# Supplementary material
Source: publisher site journal article supplement (https://www.dovepress.com/article/569457)
Supplement: Supplementary file 1 [file 569457%20Revised%20Supplementary_1.docx]

**Table S1.** Complete and adapted search strategies for all databases and registries. The table reports the full electronic search strings (including controlled vocabulary and free-text terms), database-specific syntax and limits/filters, and the corresponding registries queried to support transparent and reproducible evidence retrieval.

| **Database** | **Search Strategy / Query (Variant)** | **Rationale / Adaptation Notes** |
| --- | --- | --- |
| PubMed | **V1 (MeSH-anchored):** | **V1:** Standard approach using MeSH for clinical and device diagnostics. **V2:**Supplemental broad search to maximize sensitivity for any diagnostic study. **V3:**Targets emerging computational diagnostic approaches (AI/ML). |
| ("Toxoplasmosis"[MeSH] OR toxoplasmosis[tiab] OR "Toxoplasma gondii"[tiab]) |
| AND |
| ("Point-of-Care Testing"[MeSH] OR "Diagnostic Equipment"[MeSH] OR "point-of-care"[tiab] OR "diagnostic device"[tiab] OR biosensor*[tiab] OR microfluidic*[tiab]) |
|  |
| **V2 (Broad Text):** |
| (toxoplasmosis[tiab] OR "Toxoplasma gondii"[tiab]) |
| AND |
| (diagnos*[tiab] OR test*[tiab] OR detect*[tiab]) |
|  |
| **V3 (AI/ML Focus):** |
| ("Toxoplasmosis"[MeSH] OR toxoplasmosis[tiab] OR "Toxoplasma gondii"[tiab]) |
| AND |
| ("Artificial Intelligence"[MeSH] OR "Machine Learning"[MeSH] OR "Deep Learning"[MeSH] OR "computer aided diagnosis"[tiab] OR "convolutional neural network"[tiab]) |
| Embase (via Embase.com) | **V1 (Comprehensive - Advanced Search):** | Syntax for embase.com: • '/exp' = Explode Emtree term • ':ti,ab,kw' = Search in Title, Abstract, Keywords • * = Truncation • Queries built using Advanced Search interface with line numbers (#1, #2, etc.) |
| #1: 'toxoplasmosis'/exp OR (toxoplasmosis OR 'toxoplasma gondii'):ti,ab,kw |
| #2: 'point of care testing'/exp OR 'diagnostic equipment'/exp OR 'biosensor'/exp OR 'microfluidics'/exp |
| #3: 'artificial intelligence'/exp OR 'machine learning'/exp OR 'deep learning'/exp |
| #4: #2 OR #3 |
| #5: #1 AND #4 |
|  |
| **V2 (Device-focused):** |
| ('toxoplasmosis'/exp) AND (biosensor*:ti,ab,kw OR microfluidic*:ti,ab,kw OR 'lateral flow':ti,ab,kw OR lamp:ti,ab,kw) |
|  |
| **V3 (AI/ML Focus):** |
| 'toxoplasmosis'/exp AND ('artificial intelligence'/exp OR 'machine learning'/exp OR (('computer aided diagnosis' OR cnn):ti,ab,kw)) |
| Scopus | **Main Strategy:** | No controlled vocabulary. Separate queries optimize retrieval for device technologies and AI/ML literature. |
| TITLE-ABS-KEY( ( toxoplasmosis OR "toxoplasma gondii" ) |
| AND |
| ( "point of care" OR "diagnostic device" OR biosensor* OR microfluidic* OR "lateral flow" OR LAMP ) ) |
|  |
| **AI/ML Strategy:** |
| TITLE-ABS-KEY( ( toxoplasmosis OR "toxoplasma gondii" ) |
| AND |
| ( "artificial intelligence" OR "machine learning" OR "deep learning" OR "computer aided diagnosis" OR "convolutional neural network" OR cnn ) ) |
| Web of Science (Core Collection) | **Device/POCT Query:** | Uses the Topic (TS) field. Parallel searches for device and AI concepts ensure comprehensive coverage. |
| TS=( (toxoplasmosis OR "toxoplasma gondii") |
| AND |
| ("point of care" OR "diagnostic device" OR biosensor* OR microfluidic*) ) |
|  |
| **AI/ML Query:** |
| TS=( (toxoplasmosis OR "toxoplasma gondii") |
| AND |
| ("artificial intelligence" OR "machine learning" OR "deep learning") ) |
| IEEE Xplore | ("Abstract":toxoplasma OR "Abstract":toxoplasmosis) | Simple syntax focusing on terms most likely to appear in engineering and computer science abstracts. |
| AND |
| ("Abstract":biosensor OR "Abstract":microfluidic OR "Abstract":"point of care" OR "Abstract":diagnostic) |
| Engineering Village (Compendex) | **Query 1 (Controlled Vocabulary):** | **Query 1:** Uses the *Controlled Vocabulary (CV)* field for precision via engineering thesaurus. **Query 2:**Broad search in ALL fields to capture mentions outside the controlled vocabulary. |
| ((toxoplasmosis) WN CV) |
| AND |
| ((biosensors OR microfluidics OR "point of care systems") WN CV) |
|  |
| **Query 2 (All Fields):** |
| ({toxoplasma gondii} WN ALL) |
| AND |
| ({diagnostic device} OR {lateral flow} OR {LAMP}) WN ALL) |
| [ClinicalTrials.gov](https://clinicaltrials.gov/) | **Approach 1 (Filter-based):** | Uses the platform's built-in filters for diagnostic studies, supplemented by a complementary broad text search. |
| Condition: "Toxoplasmosis" | Status: All | Study Type: "Diagnostic" |
|  |
| **Approach 2 (Text search):** |
| Search Terms: "Toxoplasma gondii diagnostic" |
| ProQuest Dissertations & Theses Global | **Query A (General Diagnostics):** | Uses the noft (Citation and abstract) field. Two queries to capture both clinical diagnostic theses and technical/engineering dissertations. |
| noft(toxoplasmosis) AND noft(diagnos* OR test*) |
|  |
| **Query B (Tech/AI Focus):** |
| noft("toxoplasma gondii") AND noft(biosensor OR microfluidic OR "artificial intelligence" OR "machine learning") |

**Table S2.** Overview of included diagnostic studies and test evaluations for toxoplasmosis (N = 309). The table summarizes study-level characteristics and index test evaluations (distinct index test/cohort combinations), including key descriptors such as setting/population, specimen type, target/analyte, technology platform, reference standard, and data availability for meta-analysis.

| **First Author (Year)** | **Country** | **Study Design** | **Technology Category** | **Platform Type** | **Reference Standard** | **Detection Target** | **Sample Type** | **Clinical Population** | **Time to Result (Hours/Minutes)** | **Validation Stage** | **LOD** | **LOD Unit** | **TP** | **FP** | **FN** | **TN** | **Sensitivity (%)** | **Specificity (%)** |
| --- | --- | --- | --- | --- | --- | --- | --- | --- | --- | --- | --- | --- | --- | --- | --- | --- | --- | --- |
| Binnicker, 2010 [6] | USA | Prospective | Conventional / Gold Standard | Other / unclear | Serology (ELISA/ELFA/other) | IgG | Serum | General/mixed / other | 1.7 h (≈102 min) for 100 specimens | Clinical Samples (lab evaluation of clinical specimens) |  |  | 63 | 2 | 0 | 528 | 100 | 99.62 |
| Binnicker, 2010 [6] | USA | Prospective | Conventional / Gold Standard | Other / unclear | Serology (ELISA/ELFA/other) | IgG | Serum | General/mixed / other | 1.7 h (≈102 min) for 100 specimens | Clinical Samples (lab evaluation of clinical specimens) |  |  | 520 | 13 | 26 | 36 | 95.24 | 73.47 |
| Binnicker, 2010 [6] | USA | Prospective | Conventional / Gold Standard | Other / unclear | Serology (ELISA/ELFA/other) | IgG | Serum | General/mixed / other | 1.7 h (≈102 min) for 100 specimens | Clinical Samples (lab evaluation of clinical specimens) |  |  | 336 | 2 | 3 | 254 | 99.12 | 99.22 |
| Binnicker, 2010 [6] | USA | Prospective | Conventional / Gold Standard | Other / unclear | Serology (ELISA/ELFA/other) | IgM | Serum | General/mixed / other | 1.7 h (≈102 min) for 100 specimens | Clinical Samples (lab evaluation of clinical specimens) |  |  | 2 | 53 | 0 | 545 | 100 | 91.14 |
| Binnicker, 2010 [6] | USA | Prospective | Conventional / Gold Standard | Other / unclear | Serology (ELISA/ELFA/other) | IgM | Serum | General/mixed / other | 1.7 h (≈102 min) for 100 specimens | Clinical Samples (lab evaluation of clinical specimens) |  |  | 0 | 66 | 9 | 524 | 0 | 88.81 |
| Binnicker, 2010 [6] | USA | Prospective | Conventional / Gold Standard | Other / unclear | Serology (ELISA/ELFA/other) | IgM | Serum | General/mixed / other | 1.7 h (≈102 min) for 100 specimens | Clinical Samples (lab evaluation of clinical specimens) |  |  | 13 | 20 | 2 | 555 | 86.67 | 96.52 |
| Canales, 2010 [7] | Chile | Other / unclear | Conventional / Gold Standard | ELISA/ELFA | Composite / clinical adjudication | IgG avidity | Serum | General/mixed / other |  | Clinical samples (lab-based) | NR/NA | NR/NA | 14 | 0 | 0 | 21 | 100 | 100 |
| Holec-Gąsior, 2010 [8] | Poland | Case-control | Conventional / Gold Standard | ELISA/ELFA | Serology (ELISA/ELFA/other) | IgG | Serum | General/mixed / other |  | Clinical samples (lab-only) |  |  | 134 | 0 | 55 | 21 | 70.9 | 100 |
| Holec-Gąsior, 2010 [8] | Poland | Case-control | Conventional / Gold Standard | ELISA/ELFA | Serology (ELISA/ELFA/other) | IgG | Serum | General/mixed / other |  | Clinical samples (lab-only) |  |  | 178 | 0 | 11 | 21 | 94.18 | 100 |
| Holec-Gąsior, 2010 [8] | Poland | Case-control | Conventional / Gold Standard | ELISA/ELFA | Serology (ELISA/ELFA/other) | IgG | Serum | General/mixed / other |  | Clinical samples (lab-only) |  |  | 175 | 0 | 14 | 21 | 92.59 | 100 |
| Holec-Gąsior, 2010 [8] | Poland | Case-control | Conventional / Gold Standard | ELISA/ELFA | Serology (ELISA/ELFA/other) | IgG | Serum | General/mixed / other |  | Clinical samples (lab-only) |  |  | 155 | 0 | 34 | 21 | 82.01 | 100 |
| Holec-Gąsior, 2010 [8] | Poland | Case-control | Conventional / Gold Standard | ELISA/ELFA | Serology (ELISA/ELFA/other) | IgG | Serum | General/mixed / other |  | Clinical samples (lab-only) |  |  | 176 | 0 | 13 | 21 | 93.12 | 100 |
| Holec-Gąsior, 2010 [8] | Poland | Case-control | Conventional / Gold Standard | ELISA/ELFA | Serology (ELISA/ELFA/other) | IgG | Serum | General/mixed / other |  | Clinical samples (lab-only) |  |  | 163 | 0 | 26 | 21 | 86.24 | 100 |
| Holec-Gąsior, 2010 [8] | Poland | Case-control | Conventional / Gold Standard | ELISA/ELFA | Serology (ELISA/ELFA/other) | IgG | Serum | General/mixed / other |  | Clinical samples (lab-only) |  |  | 178 | 0 | 11 | 21 | 94.18 | 100 |
| Holec-Gąsior, 2010 [8] | Poland | Case-control | Conventional / Gold Standard | ELISA/ELFA | Serology (ELISA/ELFA/other) | IgG | Serum | General/mixed / other |  | Clinical samples (lab-only) |  |  | 166 | 0 | 23 | 21 | 87.83 | 100 |
| Lau, 2010 [9] | Malaysia | Case-control | POCT | LAMP | PCR/qPCR | Nucleic acid (DNA) | Whole blood | General/mixed / other | 30–60 min (amplification) | Clinical Samples (lab-only) + Analytical | 0.10 | tachyzoite equivalents | 32 | 0 | 8 | 65 | 80 | 100 |
| Lau, 2010 [9] | Malaysia | Case-control | POCT | LAMP | PCR/qPCR | Nucleic acid (DNA) | Whole blood | General/mixed / other | 30–60 min (amplification) | Clinical Samples (lab-only) + Analytical | 0.10 | tachyzoite equivalents | 35 | 0 | 5 | 65 | 87.5 | 100 |
| Lau, 2010 [9] | Malaysia | Case-control | POCT | LAMP | PCR/qPCR | Nucleic acid (DNA) | Whole blood | General/mixed / other | 30–60 min (amplification) | Clinical Samples (lab-only) + Analytical | 0.10 | tachyzoite equivalents | 32 | 0 | 8 | 65 | 80 | 100 |
| Machado, 2010 [10] | Brazil | Cohort | Conventional / Gold Standard | Immunoblot / Western blot | Serology (ELISA/ELFA/other) | IgG | Serum | Congenital/newborn/infant |  | Clinical samples |  |  | 130 | 1 | 47 | 37 | 73.45 | 97.37 |
| Machado, 2010 [10] | Brazil | Cohort | Conventional / Gold Standard | Immunoblot / Western blot | Serology (ELISA/ELFA/other) | IgM | Serum | Congenital/newborn/infant |  | Clinical samples |  |  | 97 | 2 | 80 | 36 | 54.8 | 94.74 |
| Machado, 2010 [10] | Brazil | Cohort | Conventional / Gold Standard | Immunoblot / Western blot | Serology (ELISA/ELFA/other) | IgG + IgM | Serum | Congenital/newborn/infant |  | Clinical samples |  |  | 153 | 2 | 24 | 36 | 86.44 | 94.74 |
| Prusa, 2010 [11] | Austria | Diagnostic evaluation | Conventional / Gold Standard | Other / unclear | Composite / clinical adjudication | IgG + IgM | Serum | Pregnancy/antenatal | 18 minutes | Clinical Samples; Lab-only |  |  |  |  |  |  |  |  |
| Saraei, 2010 [12] | Iran | Method development / analytical validation | Conventional / Gold Standard | Immunofluorescence | Other / unclear | IgG | Serum | General/mixed / other | NR (procedure includes 30 min incubation; total turnaround not stated) | Clinical Samples; Lab-only |  |  |  |  |  |  |  |  |
| Liang, 2011 [13] | Turkey | Retrospective | Machine Learning | Other / unclear | Serology (ELISA/ELFA/other) | IgG + IgM | Serum | General/mixed / other |  | Clinical samples; lab-only (retrospective sera) |  |  |  |  |  |  |  |  |
| Okusaga, 2011 [14] | Germany | Cross-sectional | Conventional / Gold Standard | ELISA/ELFA | Composite / clinical adjudication | IgG | Plasma | General/mixed / other |  | Clinical samples (human plasma) |  |  |  |  |  |  |  |  |
| Sugita, 2011 [15] | Japan | Diagnostic evaluation | Conventional / Gold Standard | PCR/qPCR | Composite / clinical adjudication | Nucleic acid (DNA) | Ocular fluid | Ocular toxoplasmosis / ophthalmology |  | Clinical Samples | qPCR threshold: “significant” if >10 copies/mL | copies/mL |  | 0 |  | 30 |  | 100 |
| Busemann, 2012 [16] | Germany | Case series | Conventional / Gold Standard | PCR/qPCR | PCR/qPCR | IgG + IgM | Blood (unspecified) | General/mixed / other |  | Clinical samples + retrospective (post-mortem) analytical comparison | Nested PCR: 480 fg/µl; qPCR (manufacturer): 10 copies | fg/µl; copies |  |  |  |  |  |  |
| Chiang, 2012 [17] | USA | Case report | Conventional / Gold Standard | Imaging | Serology (ELISA/ELFA/other) | Other / unclear | Serum | Ocular toxoplasmosis / ophthalmology |  | Clinical samples (single clinical case) |  |  |  |  |  |  |  |  |
| Jalallou, 2012 [18] | Iran | Case-control | Conventional / Gold Standard | ELISA/ELFA | Serology (ELISA/ELFA/other) | IgM | Serum | General/mixed / other | ≈4–5 h assay run (+ overnight coating) | Clinical Samples (lab-based) |  |  | 24 | 4 | 6 | 36 | 80 | 90 |
| Khammari, 2012 [19] | Tunisia | Diagnostic evaluation | Conventional / Gold Standard | Immunoblot / Western blot | Serology (ELISA/ELFA/other) | IgG | Serum | Pregnancy/antenatal | ≈8 hours (protocol-based; electrophoresis time not explicitly reported) | Clinical Samples; Lab-only (laboratory evaluation on patient sera) | NR/NA | NR/NA | 76 | 1 | 11 | 32 | 87.36 | 96.97 |
| Selseleh, 2012 [20] | Iran | Case-control | Conventional / Gold Standard | ELISA/ELFA | Serology (ELISA/ELFA/other) | IgM | Serum | General/mixed / other |  | Clinical Samples (lab-based) + cross-reactivity panel |  |  | 68 |  | 2 |  | 97.14 |  |
| Selseleh, 2012 [20] | Iran | Case-control | Conventional / Gold Standard | ELISA/ELFA | Serology (ELISA/ELFA/other) | IgG | Serum | General/mixed / other |  | Clinical Samples (lab-based) + cross-reactivity panel |  |  | 66 |  | 8 |  | 89.19 |  |
| Silva-dos-Santos, 2012 [21] | Brazil | Diagnostic evaluation | Conventional / Gold Standard | Immunofluorescence | Serology (ELISA/ELFA/other) | IgG avidity | Serum | General/mixed / other | N/S (protocol includes multiple 30-min incubations + 5-min urea step) | Clinical samples (serum bank; lab-based evaluation) | N/S | N/S | 30 | 3 | 0 | 49 | 100 | 94.23 |
| Villard, 2012 [22] | France | Retrospective | Conventional / Gold Standard | Agglutination | Serology (ELISA/ELFA/other) | IgG + IgM | Serum | Pregnancy/antenatal |  | Clinical samples (lab-only; retrospective panels) | 10 | IU/mL | 237 | 6 | 16 | 193 | 93.68 | 96.98 |
| Villard, 2012 [22] | France | Retrospective | Conventional / Gold Standard | Agglutination | Serology (ELISA/ELFA/other) | IgG + IgM | Serum | Pregnancy/antenatal |  | Clinical samples (lab-only; retrospective panels) | 10 | IU/mL | 245 | 5 | 8 | 194 | 96.84 | 97.49 |
| Villard, 2012 [22] | France | Retrospective | Conventional / Gold Standard | Agglutination | Serology (ELISA/ELFA/other) | IgG + IgM | Serum | Pregnancy/antenatal |  | Clinical samples (lab-only; retrospective panels) |  |  | 250 | 2 | 3 | 197 | 98.81 | 98.99 |
| Villard, 2012 [22] | France | Retrospective | Conventional / Gold Standard | Agglutination | Serology (ELISA/ELFA/other) | IgG + IgM | Serum | Pregnancy/antenatal |  | Clinical samples (lab-only; retrospective panels) | 5 | IU/mL | 253 | 2 | 0 | 197 | 100 | 98.99 |
| Villard, 2012 [22] | France | Retrospective | Conventional / Gold Standard | Agglutination | Serology (ELISA/ELFA/other) | IgG + IgM | Serum | Pregnancy/antenatal |  | Clinical samples (lab-only; retrospective panels) | 8 | IU/mL | 253 | 2 | 0 | 197 | 100 | 98.99 |
| Villard, 2012 [22] | France | Retrospective | Conventional / Gold Standard | Agglutination | Serology (ELISA/ELFA/other) | IgG + IgM | Serum | Pregnancy/antenatal |  | Clinical samples (lab-only; retrospective panels) | 4 | IU/mL | 253 | 2 | 0 | 197 | 100 | 98.99 |
| Asai, 2013 [23] | Japan | Case-control | Conventional / Gold Standard | LAMP | Other / unclear | Nucleic acid (DNA) | CSF | General/mixed / other |  | Analytical + Clinical Samples (CSF) | 1.0 × 10⁻⁸ | ng/mL |  |  |  |  |  |  |
| Bhattacharyya, 2013 [24] | India | Case-control | Conventional / Gold Standard | ELISA/ELFA | Serology (ELISA/ELFA/other) | IgG + IgM | Serum | HIV/AIDS |  | Clinical Samples (Lab-only) |  |  |  |  |  |  |  |  |
| Chemoh, 2013 [25] | Thailand | Cross-sectional | Conventional / Gold Standard | ELISA/ELFA | Serology (ELISA/ELFA/other) | IgG | Serum | Pregnancy/antenatal |  | Clinical samples (hospital-based) |  |  | 95 | 142 | 10 | 503 | 90.48 | 77.98 |
| Chemoh, 2013 [25] | Thailand | Cross-sectional | Conventional / Gold Standard | ELISA/ELFA | Serology (ELISA/ELFA/other) | IgG | Serum | Pregnancy/antenatal |  | Clinical samples (hospital-based) |  |  | 100 | 183 | 5 | 462 | 95.24 | 71.63 |
| Dai, 2013 [26] | China | Diagnostic evaluation | Conventional / Gold Standard | ELISA/ELFA | Serology (ELISA/ELFA/other) | IgM | Serum | Pregnancy/antenatal |  | Clinical Samples (Lab-only) |  |  | 56 | 0 | 2 | 103 | 96.55 | 100 |
| Dai, 2013 [26] | China | Diagnostic evaluation | Conventional / Gold Standard | ELISA/ELFA | Serology (ELISA/ELFA/other) | IgG | Serum | Pregnancy/antenatal |  | Clinical Samples (Lab-only) |  |  | 80 | 1 | 3 | 77 | 96.39 | 98.72 |
| Deshpande, 2013 [27] | Malaysia | Case-control | Conventional / Gold Standard | Immunoblot / Western blot | Serology (ELISA/ELFA/other) | IgG avidity | Serum | Pregnancy/antenatal | NR (multi-hour Western blot procedure; step times described but total not stated) | Clinical Samples; Lab-only (banked sera tested in laboratory) |  |  |  |  |  |  |  |  |
| Khammari, 2013 [28] | Tunisia | Cross-sectional | Conventional / Gold Standard | ELISA/ELFA | Other / unclear | IgG | Serum | Pregnancy/antenatal | N/S | Clinical samples (routine hospital laboratory series) | N/S | N/S |  |  |  |  |  |  |
| Mikita, 2013 [29] | Japan | Retrospective | POCT | LAMP | Composite / clinical adjudication | Nucleic acid (DNA) | CSF | HIV/AIDS | LAMP: 60 min (63 °C); nested PCR: NR | Analytical + Clinical samples (stored human CSF) | 1.0 × 10−8 | ng/μL DNA | 8 | 0 | 8 | 12 | 50 | 100 |
| Mikita, 2013 [29] | Japan | Retrospective | Conventional / Gold Standard | PCR/qPCR | Composite / clinical adjudication | Nucleic acid (DNA) | CSF | HIV/AIDS |  | Clinical Samples (plus analytical LOD work) | 1.0 × 10⁻⁸ | ng/µL (genomic DNA) | 8 | 0 | 8 | 12 | 50 | 100 |
| Murat, 2013 [30] | France | Diagnostic evaluation | Conventional / Gold Standard | Other / unclear | Composite / clinical adjudication | IgG | Serum | Pregnancy/antenatal |  | Clinical samples |  |  |  |  |  |  |  |  |
| Murat, 2013 [30] | France | Diagnostic evaluation | Conventional / Gold Standard | Other / unclear | Composite / clinical adjudication | IgM | Serum | Pregnancy/antenatal |  | Clinical samples |  |  |  |  |  |  |  |  |
| Prusa, 2013 [31] | Austria | Prospective | Conventional / Gold Standard | Other / unclear | Composite / clinical adjudication | IgG + IgM | Serum | Pregnancy/antenatal |  | Clinical Samples (real-world prenatal screening + delivery testing; single-center cohort) |  |  |  |  |  |  |  |  |
| Song, 2013 [32] | Republic of Korea | Diagnostic evaluation | POCT | LFIA / rapid immunoassay | Serology (ELISA/ELFA/other) | Other / unclear | Serum | General/mixed / other |  | Clinical samples; Lab-only (stored sera tested in duplicate) |  |  | 33 | 0 | 1 | 33 | 97.06 | 100 |
| Villard, 2013 [33] | France | Retrospective | Conventional / Gold Standard | Other / unclear | Composite / clinical adjudication | IgG avidity | Serum | Pregnancy/antenatal | 5 min | Clinical Samples + Pilot Field |  |  | 121 | 0 | 18 | 56 | 87.05 | 100 |
| Villard, 2013 [33] | France | Retrospective | Conventional / Gold Standard | ELISA/ELFA | Composite / clinical adjudication | IgG avidity | Serum | Pregnancy/antenatal |  | Clinical samples; lab-based evaluation + retrospective audit |  |  | 122 | 0 | 17 | 56 | 87.77 | 100 |
| Villard, 2013 [33] | France | Retrospective | Conventional / Gold Standard | ELISA/ELFA | Composite / clinical adjudication | IgG avidity | Serum | Pregnancy/antenatal |  | Clinical samples; lab-based evaluation + retrospective audit |  |  | 104 | 0 | 35 | 56 | 74.82 | 100 |
| Villard, 2013 [33] | France | Retrospective | Conventional / Gold Standard | Other / unclear | Composite / clinical adjudication | IgG avidity | Serum | Pregnancy/antenatal |  | Clinical samples; lab-based evaluation + retrospective audit |  |  | 121 | 0 | 18 | 56 | 87.05 | 100 |
| Caballero-Ortega, 2014 [34] | Mexico | Cross-sectional | Conventional / Gold Standard | ELISA/ELFA | Composite / clinical adjudication | IgG | Serum | General/mixed / other |  | Clinical samples; lab-based evaluation + retrospective audit |  |  | 63 | 64 | 2 | 105 | 96.92 | 62.13 |
| Caballero-Ortega, 2014 [34] | Mexico | Cross-sectional | Conventional / Gold Standard | Immunoblot / Western blot | Composite / clinical adjudication | IgG | Serum | General/mixed / other |  | Clinical samples; lab-only |  |  | 63 | 12 | 14 | 105 | 81.82 | 89.74 |
| Caballero-Ortega, 2014 [34] | Mexico | Cross-sectional | Conventional / Gold Standard | ELISA/ELFA | Composite / clinical adjudication | IgG | Serum | General/mixed / other |  | Clinical samples; lab-only |  |  | 63 | 2 | 43 | 105 | 59.43 | 98.13 |
| Khammari, 2014 [35] | Tunisia | Method development / analytical validation | Conventional / Gold Standard | Immunoblot / Western blot | Serology (ELISA/ELFA/other) | IgG | Serum | Pregnancy/antenatal |  | Clinical samples; lab-only | N/S | N/S | 150 | 1 | 4 | 99 | 97.4 | 99 |
| Ogouyèmi-Hounto, 2014 [36] | Benin | Cohort | POCT | Other / unclear | Serology (ELISA/ELFA/other) | IgG | Serum | Pregnancy/antenatal | N/S | Clinical Samples; Lab-only (serum-based confirmatory testing) |  |  | 129 | 0 | 4 | 133 | 96.99 | 100 |
| Ogouyèmi-Hounto, 2014 [36] | Benin | Cohort | POCT | Other / unclear | Serology (ELISA/ELFA/other) | IgM | Serum | Pregnancy/antenatal |  | Clinical Samples |  |  | 1 | 0 | 2 | 263 | 33.33 | 100 |
| Varlet-Marie, 2014 [37] | France | Method development / analytical validation | Conventional / Gold Standard | PCR/qPCR | PCR/qPCR | Nucleic acid (DNA) | Amniotic fluid | General/mixed / other |  | Clinical Samples | 0.01 | T. gondii genome equivalents per PCR tube (Tgg/PCR tube); stated equivalent 0.1 Tgg/ml AF |  |  |  |  |  |  |
| Blay, 2015 [38] | Ghana | Cross-sectional | Conventional / Gold Standard | PCR/qPCR | PCR/qPCR | IgG + IgM | Plasma | Pregnancy/antenatal |  | Analytical Only + multicenter lab validation (eight laboratories; spiked clinical matrix AF) |  |  | 20 | 4 | 40 | 15 | 33.33 | 78.95 |
| Capobiango, 2015 [39] | Brazil | Diagnostic evaluation | Conventional / Gold Standard | ELISA/ELFA | Serology (ELISA/ELFA/other) | IgG | Serum | Pregnancy/antenatal |  | N/Mechanism: clinical history/serology suggests past infection with reactivation under immunosuppression; not assay-based |  |  |  | 32 |  |  |  | 0 |
| Filisetti et al., 2015 [40] | France | Retrospective | Conventional / Gold Standard | PCR/qPCR | Other / unclear | Nucleic acid (DNA) | Amniotic fluid | Pregnancy/antenatal |  | Clinical Samples | 5 | tachyzoites/mL (AF) | 54 | 0 |  | 29 | 100 | 100 |
| Hallur, 2015 [41] | India | Diagnostic evaluation | Conventional / Gold Standard | PCR/qPCR | Composite / clinical adjudication | Nucleic acid (DNA) | CSF | General/mixed / other | NR (protocol includes overnight coating + multiple incubations) | Clinical samples (lab-based evaluation on prenatal sera) | 10 pg | pg (DNA) | 5 | 0 | 1 | 18 | 83.33 | 100 |
| Li, 2015 [42] | China | Case-control | POCT | LFIA / rapid immunoassay | Other / unclear | IgM | Serum | General/mixed / other |  | Clinical Samples (multicenter; largely retrospective biobank) |  |  |  | 0 | 0 | 121 |  | 100 |
| Previato, 2015 [43] | Brazil | Case series | Conventional / Gold Standard | PCR/qPCR | Composite / clinical adjudication | IgG + IgM | Blood (unspecified) | Ocular toxoplasmosis / ophthalmology |  | Analytical + Clinical samples |  |  |  |  |  |  |  |  |
| Prusa, 2015 [44] | Austria | Cohort | Conventional / Gold Standard | PCR/qPCR | Serology (ELISA/ELFA/other) | Nucleic acid (DNA) | Amniotic fluid | Pregnancy/antenatal | 15 minutes | Clinical Samples; Lab-only (retrospective serum re-testing) |  |  | 34 | 2 | 5 | 666 | 87.18 | 99.7 |
| Robert-Gangneux, 2015 [45] | France | Retrospective | Conventional / Gold Standard | PCR/qPCR | Composite / clinical adjudication | Nucleic acid (DNA) | Blood (unspecified) | HIV/AIDS |  | Clinical samples (hospital-based follow-up; immunocompetent adults) |  |  |  |  |  |  |  |  |
| Rodrigues, 2015 [46] | Brazil | Retrospective | Conventional / Gold Standard | Other / unclear | Serology (ELISA/ELFA/other) | IgG + IgM | Serum | Pregnancy/antenatal | ≤24 h (DNA extracted within 24 h; PCR performed thereafter) | Clinical samples (nationwide prenatal screening register; routine-care cohort) | NA / NR (antibody assay; cut-offs reported instead) |  |  |  |  |  |  |  |
| Arab-Mazar, 2016 [47] | Iran | Case-control | Conventional / Gold Standard | ELISA/ELFA | Serology (ELISA/ELFA/other) | Nucleic acid (DNA) | Serum | General/mixed / other |  | Clinical Samples (routine diagnostic; multicenter retrospective) |  |  |  |  |  |  |  |  |
| Avci, 2016 [48] | Turkey | Retrospective | Conventional / Gold Standard | PCR/qPCR | Composite / clinical adjudication | Nucleic acid (DNA) | Amniotic fluid | Pregnancy/antenatal | NR (qualitatively described as “time-efficient”; direct measurement without time-control steps) | Clinical samples (lab-based evaluation; includes subset comparison vs commercial system) |  |  |  |  |  |  |  |  |
| Costa, 2016 [49] | Argentina | Retrospective | Conventional / Gold Standard | ELISA/ELFA | Serology (ELISA/ELFA/other) | IgG | Serum | Pregnancy/antenatal |  | Clinical samples + lab-based molecular validation (LAMP) |  |  | 15 | 3 | 3 | 15 | 83.33 | 83.33 |
| Costa, 2016 [49] | Argentina | Retrospective | Conventional / Gold Standard | ELISA/ELFA | Serology (ELISA/ELFA/other) | IgG | Serum | Pregnancy/antenatal |  | Clinical Samples (lab-based PCR + clinical follow-up) |  |  | 15 | 5 | 3 | 13 | 83.33 | 72.22 |
| Costa, 2016 [49] | Argentina | Retrospective | Conventional / Gold Standard | ELISA/ELFA | Serology (ELISA/ELFA/other) | IgG avidity | Serum | Pregnancy/antenatal |  | Clinical Samples; Lab-only |  |  |  |  |  |  |  |  |
| Costa, 2016 [49] | Argentina | Retrospective | Conventional / Gold Standard | ELISA/ELFA | Serology (ELISA/ELFA/other) | IgG avidity | Serum | Pregnancy/antenatal |  | Clinical Samples; Lab-only |  |  |  |  |  |  |  |  |
| de Oliveira, 2016 [50] | Brazil | Case series | Conventional / Gold Standard | ELISA/ELFA | Composite / clinical adjudication | IgG + IgM | CSF | HIV/AIDS |  | Clinical Samples; Lab-only |  |  |  |  |  |  |  |  |
| El-Bali, 2016 [51] | Saudi Arabia | Diagnostic evaluation | Conventional / Gold Standard | ELISA/ELFA | Composite / clinical adjudication | IgG avidity | Serum | Pregnancy/antenatal |  | Clinical Samples; Lab-only |  |  |  |  |  |  |  |  |
| Fan, 2016 [52] | China | Other / unclear | Conventional / Gold Standard | ELISA/ELFA | Not stated / none | IgG + IgM | Serum | Pregnancy/antenatal |  | Clinical samples (hospital cases) |  |  |  |  |  |  |  |  |
| Mohammadpour, 2016 [53] | Iran | Case-control | Conventional / Gold Standard | ELISA/ELFA | Serology (ELISA/ELFA/other) | IgG | Serum | General/mixed / other |  | Clinical Samples (lab-based antenatal screening) |  |  | 98 | 0 | 2 | 40 | 98 | 100 |
| Mohammadpour, 2016 [53] | Iran | Case-control | Conventional / Gold Standard | ELISA/ELFA | Serology (ELISA/ELFA/other) | IgM | Serum | General/mixed / other |  | Clinical samples; lab-based testing |  |  | 99 |  | 1 |  | 99 |  |
| Mohammadpour, 2016 [53] | Iran | Diagnostic evaluation | Conventional / Gold Standard | ELISA/ELFA | Serology (ELISA/ELFA/other) | IgG | Serum | General/mixed / other | ≈7 hours (≈420 min incubation steps; excluding wash/handling) | Clinical samples; Lab-only evaluation |  |  | 98 | 0 | 2 | 40 | 98 | 100 |
| Mohammadpour, 2016 [53] | Iran | Diagnostic evaluation | Conventional / Gold Standard | ELISA/ELFA | Serology (ELISA/ELFA/other) | IgM | Serum | General/mixed / other | ≈7 hours (≈420 min incubation steps; excluding wash/handling) | Clinical samples; Lab-only evaluation |  |  | 99 |  | 1 |  | 99 |  |
| Poltavchenko, 2016 [54] | Russia | Diagnostic evaluation | POCT | Other / unclear | Serology (ELISA/ELFA/other) | IgG | Plasma | General/mixed / other | ~7 hours (incubation schedule reported; excludes antigen preparation) | Clinical samples (lab-only; retrospective selection by prior commercial ELISA status) | 10 | pg (per stain/spot) | 47 | 0 | 1 | 26 | 97.92 | 100 |
| Sroka, 2016 [55] | Poland | Other / unclear | Conventional / Gold Standard | ELISA/ELFA | Serology (ELISA/ELFA/other) | IgG avidity | Serum | Pregnancy/antenatal | ~7 hours (incubation schedule reported; excludes antigen preparation) | Clinical samples (lab-only; retrospective selection by prior commercial ELISA status) |  |  |  |  |  |  |  |  |
| Stajner, 2016 [56] | Serbia | Cross-sectional | Conventional / Gold Standard | PCR/qPCR | Serology (ELISA/ELFA/other) | Nucleic acid (DNA) | Blood (unspecified) | Pregnancy/antenatal | 70 min | Lab-only (sera panels; comparative vs ELISA) | Analytical LOD NR; observed quantification in clinical samples: 3–24 parasites/mL by qPCR; bioassay sensitivity noted as 10 cysts/mL | parasites/mL (observed); cysts/mL (bioassay sensitivity statement) |  |  |  |  |  |  |
| Armengol, 2017 [57] | France | Cohort | Conventional / Gold Standard | Immunoblot / Western blot | Composite / clinical adjudication | IgG | Serum | Pregnancy/antenatal |  | Clinical samples (human sera) |  |  |  |  |  |  |  |  |
| Barros, 2017 [58] | Brazil | Cohort | Conventional / Gold Standard | ELISA/ELFA | Other / unclear | IgG avidity | Serum | Pregnancy/antenatal | qPCR: NR; Bioassay: 5–6 weeks | Clinical Samples (real-world referral cohort; prenatal + postnatal diagnostic workflow) | NA (serology/avidity; not reported as LOD) |  |  |  |  |  |  |  |
| Barros, 2017 [58] | Brazil | Cohort | Conventional / Gold Standard | ELISA/ELFA | Composite / clinical adjudication | IgG avidity | Serum | Pregnancy/antenatal |  | Clinical samples; lab-based evaluation (routine prospective sampling + retrospective testing on stored sera) | NA (not applicable for serology) |  |  |  |  |  |  |  |
| Begeman, 2017 [59] | USA | Retrospective | POCT | LFIA / rapid immunoassay | Serology (ELISA/ELFA/other) | IgG + IgM | Serum | HIV/AIDS |  | Clinical Samples; Lab-only (prospective cohort; lab assays) |  |  | 129 | 0 | 0 | 51 | 100 | 100 |
| Begeman, 2017 [59] | USA | Case-control | POCT | LFIA / rapid immunoassay | Serology (ELISA/ELFA/other) | IgG + IgM | Serum | General/mixed / other |  | Clinical samples (prospective cohort); Lab-only |  |  | 129 | 0 | 0 | 51 | 100 | 100 |
| Berredjem, 2017 [60] | Algeria | Prospective | Conventional / Gold Standard | PCR/qPCR | Composite / clinical adjudication | IgG avidity | Serum | Pregnancy/antenatal | 20 minutes | Clinical samples; lab-only | “Detection level” cited (B1 PCR): 1–10 parasites in presence of 10^5 leukocytes | parasites / 10^5 leukocytes |  |  |  |  |  |  |
| Berredjem, 2017 [60] | Algeria | Prospective | Conventional / Gold Standard | PCR/qPCR | Serology (ELISA/ELFA/other) | IgG avidity | Serum | Pregnancy/antenatal | 20 minutes | Clinical samples; Lab-only (stored sera) | 1–10 parasites (stated for PCR detection level in cited method) | parasites per 10^5 human leukocytes |  |  |  |  |  |  |
| Chapey, 2017 [61] | France | Diagnostic evaluation | POCT | LFIA / rapid immunoassay | Serology (ELISA/ELFA/other) | IgG + IgM | Serum | Pregnancy/antenatal |  | Clinical Samples (PBL and AF from pregnant women) |  |  | 96 | 13 | 3 | 288 | 96.97 | 95.68 |
| Laboudi, 2017 [62] | Morocco | Retrospective | Conventional / Gold Standard | ELISA/ELFA | Serology (ELISA/ELFA/other) | IgG avidity | Serum | Pregnancy/antenatal | -- | Clinical Samples (hospital-based pregnant women; serum/PBL/AF collected during diagnosis) |  |  |  |  |  |  |  |  |
| Matin, 2017 [63] | Iran | Cross-sectional | Conventional / Gold Standard | PCR/qPCR | Serology (ELISA/ELFA/other) | IgG + IgM | Serum | Pregnancy/antenatal | 20–30 min | Clinical samples; Lab-only |  |  |  |  |  |  |  |  |
| Mazzu-Nascimento, 2017 [64] | Brazil | Cross-sectional | POCT | ELISA/ELFA | Serology (ELISA/ELFA/other) | IgG | Serum | Pregnancy/antenatal |  | Clinical samples; Lab-only |  |  | 60 | 4 | 2 | 29 | 96.77 | 87.88 |
| Murata, 2017 [65] | Brazil | Retrospective | Conventional / Gold Standard | ELISA/ELFA | PCR/qPCR | IgG | Serum | Pregnancy/antenatal |  | Clinical Samples; Lab-only |  |  | 53 | 50 | 0 | 44 | 100 | 46.81 |
| Murata, 2017 [65] | Brazil | Retrospective | Conventional / Gold Standard | ELISA/ELFA | PCR/qPCR | IgM | Serum | Pregnancy/antenatal | ~60 minutes | Clinical Samples; Lab-only |  |  | 40 | 0 | 13 | 94 | 75.47 | 100 |
| Murata, 2017 [65] | Brazil | Retrospective | Conventional / Gold Standard | ELISA/ELFA | PCR/qPCR | Other / unclear | Serum | Pregnancy/antenatal |  | Clinical samples (lab-only) |  |  | 30 | 1 | 23 | 93 | 56.6 | 98.94 |
| Murata, 2017 [65] | Brazil | Retrospective | Conventional / Gold Standard | ELISA/ELFA | PCR/qPCR | IgG | Serum | Pregnancy/antenatal |  | Clinical samples (lab-only) |  |  | 53 | 58 | 0 | 36 | 100 | 38.3 |
| Murata, 2017 [65] | Brazil | Retrospective | Conventional / Gold Standard | ELISA/ELFA | PCR/qPCR | IgM | Serum | Pregnancy/antenatal |  | Clinical samples (lab-only) |  |  | 42 | 0 | 11 | 94 | 79.25 | 100 |
| Murata, 2017 [65] | Brazil | Retrospective | Conventional / Gold Standard | PCR/qPCR | PCR/qPCR | Nucleic acid (DNA) | Whole blood | Pregnancy/antenatal |  | Clinical samples (lab-only) |  |  | 0 | 0 | 53 | 94 | 0 | 100 |
| Murata, 2017 [65] | Brazil | Retrospective | Conventional / Gold Standard | PCR/qPCR | PCR/qPCR | Nucleic acid (DNA) | Whole blood | Pregnancy/antenatal |  | Clinical samples (lab-only) |  |  | 3 | 0 | 50 | 94 | 5.66 | 100 |
| Murata, 2017 [65] | Brazil | Retrospective | Conventional / Gold Standard | PCR/qPCR | PCR/qPCR | Nucleic acid (DNA) | Whole blood | Pregnancy/antenatal |  | Clinical samples (lab-only) |  |  | 4 | 1 | 49 | 93 | 7.55 | 98.94 |
| Murata, 2017 [65] | Brazil | Retrospective | Conventional / Gold Standard | PCR/qPCR | PCR/qPCR | Nucleic acid (DNA) | Whole blood | Pregnancy/antenatal |  | Clinical samples (lab-only) |  |  | 1 | 0 | 52 | 94 | 1.89 | 100 |
| Murata, 2017 [65] | Brazil | Retrospective | Conventional / Gold Standard | ELISA/ELFA | Other / unclear | IgG avidity | Serum | Pregnancy/antenatal |  | Clinical samples (lab-only) |  |  |  |  |  |  |  |  |
| Naghili, 2017 [66] | Iran | Diagnostic evaluation | Conventional / Gold Standard | ELISA/ELFA | Serology (ELISA/ELFA/other) | IgG avidity | Serum | Pregnancy/antenatal |  | Clinical samples (lab-only) |  |  |  |  |  |  |  |  |
| Peretti, 2017 [67] | Argentina | Retrospective | POCT | Agglutination | Composite / clinical adjudication | IgG avidity | Serum | Pregnancy/antenatal |  | Clinical samples (lab-only) |  |  | 18 | 8 | 0 | 10 | 100 | 55.56 |
| Robert-Gangneux, 2017 [68] | France | Retrospective | Conventional / Gold Standard | PCR/qPCR | Composite / clinical adjudication | Nucleic acid (DNA) | CSF | Congenital/newborn/infant |  | Clinical Samples (Lab-only) | Manufacturer-announced (95%): AF 1.91–5.47 parasites/extraction; blood 34.29–88.72 parasites/mL | parasites/extraction (AF); parasites/mL (blood) | 85 | 0 | 10 | 33 | 89.47 | 100 |
| Sun, 2017 [69] | China | Cross-sectional | POCT | LAMP | PCR/qPCR | Nucleic acid (DNA) | Blood (unspecified) | Pregnancy/antenatal | 5 minutes | Clinical samples; Lab-only | 10 copies (recombinant plasmid) and ≥5 tachyzoites in 200 µL blood | copies/reaction; tachyzoites per 200 µL blood | 5 | 8 | 0 | 187 | 100 | 95.9 |
| Sun, 2017 [69] | China | Cross-sectional | POCT | LAMP | PCR/qPCR | Nucleic acid (DNA) | Blood (unspecified) | Pregnancy/antenatal | NR (extraction + qPCR run; exact duration not stated) | Analytical + Clinical samples | 10 copies (recombinant plasmid) and ≥5 tachyzoites in 200 µL blood | copies/reaction; tachyzoites per 200 µL blood | 5 | 9 | 0 | 186 | 100 | 95.38 |
| Zacche-Tonini, 2017 [70] | Brazil | Prospective | Conventional / Gold Standard | Other / unclear | Serology (ELISA/ELFA/other) | IgG avidity | Serum | Congenital/newborn/infant | Readout ≤1 h; as early as ~35 min (with loop primers) | Clinical samples + lab analytical sensitivity/specificity |  |  |  |  |  |  |  |  |
| Zhang, 2017 [71] | China | Method development / analytical validation | Conventional / Gold Standard | Other / unclear | Not stated / none | IgG | Serum | Pregnancy/antenatal | Readout ≤1 h; as early as ~35 min (with loop primers) | Clinical samples + lab analytical sensitivity/specificity | N/S | N/S |  |  |  |  |  |  |
| Zhang, 2017 [71] | China | Method development / analytical validation | Conventional / Gold Standard | Other / unclear | Not stated / none | IgG | Serum | Pregnancy/antenatal |  | Clinical Samples | N/S | N/S |  |  |  |  |  |  |
| Zhang, 2017 [71] | China | Method development / analytical validation | Conventional / Gold Standard | Other / unclear | Not stated / none | IgG | Serum | Pregnancy/antenatal | N/S | Clinical samples + Lab-only (analytical comparison) | N/S | N/S |  |  |  |  |  |  |
| Zhang, 2017 [71] | China | Method development / analytical validation | Conventional / Gold Standard | Other / unclear | Not stated / none | IgG | Serum | Pregnancy/antenatal | N/S | Clinical samples + Lab-only (analytical comparison) | N/S | N/S |  |  |  |  |  |  |
| Zhang, 2017 [71] | China | Method development / analytical validation | Conventional / Gold Standard | ELISA/ELFA | Not stated / none | IgG | Serum | Pregnancy/antenatal | N/S | Clinical samples + Lab-only (analytical comparison) | N/S | N/S |  |  |  |  |  |  |
| Abd El Aal, 2018 [72] | Egypt | Cross-sectional | POCT | LAMP | PCR/qPCR | Nucleic acid (DNA) | Blood (unspecified) | General/mixed / other | N/S | Clinical samples + Lab-only (analytical comparison) | 10 | genomic equivalents/reaction | 8 | 0 | 0 | 69 | 100 | 100 |
| Aly, 2018 [73] | Egypt | Cross-sectional | Conventional / Gold Standard | ELISA/ELFA | Composite / clinical adjudication | Antigen | Serum | Pregnancy/antenatal | N/S | Clinical samples + Lab-only (analytical comparison) | 20 | ng/mL | 60 | 8 | 10 | 42 | 85.71 | 84 |
| Aly, 2018 [73] | Egypt | Cross-sectional | Conventional / Gold Standard | ELISA/ELFA | Composite / clinical adjudication | Antigen | Serum | Pregnancy/antenatal | ≤30 min (LAMP) | Lab-only (analytical controls + clinical samples) | 5 | ng/mL | 63 | 4 | 7 | 46 | 90 | 92 |
| Aly, 2018 [73] | Egypt | Cross-sectional | Conventional / Gold Standard | ELISA/ELFA | Composite / clinical adjudication | Antigen | Urine | Pregnancy/antenatal |  | Clinical Samples (lab-based evaluation) | 20 | ng/mL | 55 | 11 | 15 | 39 | 78.57 | 78 |
| Aly, 2018 [73] | Egypt | Cross-sectional | Conventional / Gold Standard | ELISA/ELFA | Composite / clinical adjudication | Antigen | Urine | Pregnancy/antenatal |  | Clinical Samples (lab-based evaluation) | 5 | ng/mL | 58 | 9 | 12 | 41 | 82.86 | 82 |
| Barakat, 2018 [74] | Egypt | Cross-sectional | Conventional / Gold Standard | PCR/qPCR | PCR/qPCR | IgG + IgM | Serum | Pregnancy/antenatal |  | Clinical Samples (lab-based evaluation) |  |  | 25 | 12 | 2 | 34 | 92.59 | 73.91 |
| Bispo, 2018 [75] | USA | Method development / analytical validation | Conventional / Gold Standard | PCR/qPCR | Composite / clinical adjudication | Nucleic acid (DNA) | Ocular fluid | Ocular toxoplasmosis / ophthalmology |  | Clinical Samples (lab-based evaluation) | 20 (herpesviruses); 200 (T. gondii) | genome copies/reaction |  |  |  | 78 |  | 100 |
| Boudaouara, 2018 [76] | Tunisia | Case series | Conventional / Gold Standard | PCR/qPCR | Composite / clinical adjudication | IgG avidity | Serum | Congenital/newborn/infant |  | Clinical samples (hospital-based lab testing) | “< 1–10 parasites per sample” (PCR) | parasites/sample |  |  |  |  |  |  |
| Boudaouara, 2018 [76] | Tunisia | Case series | Conventional / Gold Standard | PCR/qPCR | Composite / clinical adjudication | IgG + IgM | CSF | Pregnancy/antenatal | 1 h 40 min (<2 h) | Analytical + Clinical Samples (Lab-only) | <1–10 parasites per sample | parasites/sample |  |  |  |  |  |  |
| Carral, 2018 [77] | Argentina | Cohort | Conventional / Gold Standard | Other / unclear | Composite / clinical adjudication | IgM | Serum | Pregnancy/antenatal |  | Clinical Samples (retrospective clinical cohort/case series) |  |  | 21 | 0 | 3 | 43 | 87.5 | 100 |
| Carral, 2018 [77] | Argentina | Cohort | Conventional / Gold Standard | Other / unclear | Composite / clinical adjudication | Other / unclear | Serum | Pregnancy/antenatal |  | Clinical samples (retrospective) |  |  | 22 | 0 | 2 | 43 | 91.67 | 100 |
| Carral, 2018 [77] | Argentina | Cohort | Conventional / Gold Standard | Other / unclear | Composite / clinical adjudication | IgM | Serum | Pregnancy/antenatal |  | Clinical samples (newborns) + follow-up |  |  | 23 | 0 | 1 | 43 | 95.83 | 100 |
| Carral, 2018 [77] | Argentina | Cohort | Conventional / Gold Standard | Other / unclear | Composite / clinical adjudication | Other / unclear | Serum | Pregnancy/antenatal |  | Clinical samples (newborns) + follow-up |  |  | 6 | 0 | 8 | 22 | 42.86 | 100 |
| Carral, 2018 [77] | Argentina | Cohort | Conventional / Gold Standard | Other / unclear | Composite / clinical adjudication | Other / unclear | Blood (unspecified) | Congenital/newborn/infant |  | Clinical samples (newborns) + follow-up |  |  | 4 | 0 | 1 | 36 | 80 | 100 |
| Carral, 2018 [77] | Argentina | Cohort | Conventional / Gold Standard | PCR/qPCR | Composite / clinical adjudication | Nucleic acid (DNA) | Blood (unspecified) | Congenital/newborn/infant |  | Clinical samples (newborns) + follow-up |  |  | 1 | 2 | 1 | 14 | 50 | 87.5 |
| Çınar Tanrıverdi, 2018 [78] | Turkey | Retrospective | Conventional / Gold Standard | ELISA/ELFA | Not stated / none | IgG avidity | Blood (unspecified) | Pregnancy/antenatal |  | Clinical samples + lab confirmation |  |  |  |  |  |  |  |  |
| Masini, 2018 [79] | Italy | Cohort | Conventional / Gold Standard | PCR/qPCR | PCR/qPCR | Nucleic acid (DNA) | Blood (unspecified) | Pregnancy/antenatal |  | Clinical samples + lab-only molecular testing |  |  |  |  |  |  |  |  |
| Roiko, 2018 [80] | USA | Diagnostic evaluation | Conventional / Gold Standard | ELISA/ELFA | Composite / clinical adjudication | IgG + IgM | Serum | General/mixed / other |  | Clinical Samples; Lab-only (retrospective hospital lab results) | Tachyzoite IFA: ~35 h incubation + staining; Bradyzoite IFA: 4–5 days induction + staining |  |  |  |  |  |  |  |
| Sardarian, 2018 [81] | Iran | Cross-sectional | Conventional / Gold Standard | PCR/qPCR | PCR/qPCR | Nucleic acid (DNA) | Blood (unspecified) | Pregnancy/antenatal |  | Clinical Samples (retrospective cohort; tertiary referral center) |  |  |  |  |  |  |  |  |
| Varlet-Marie, 2018 [82] | France | Retrospective | POCT | LAMP | PCR/qPCR | Nucleic acid (DNA) | Blood (unspecified) | Pregnancy/antenatal |  | Mechanism proposed: anti-bradyzoite antibodies not detected in IgM+/IgG− sera (suggesting potential stage-timing signal) | Analytical sensitivity threshold: <0.04 Tgg per LAMP reaction; reduced detection at 0.1 Tgg/mL noted | T. gondii genome equivalents (Tgg) per reaction; also discussed as Tgg/mL |  |  |  |  |  |  |
| Boquel, 2019 [83] | France | Retrospective | Conventional / Gold Standard | Other / unclear | Serology (ELISA/ELFA/other) | IgG avidity | Serum | General/mixed / other |  | Others (methods/practices survey + guideline proposal; not a clinical diagnostic accuracy validation) |  |  |  |  |  |  |  |  |
| Botein, 2019 [84] | Egypt | Cross-sectional | Conventional / Gold Standard | ELISA/ELFA | PCR/qPCR | IgM | Serum | Pregnancy/antenatal |  | Clinical samples, Lab-only |  |  | 6 | 0 | 5 | 89 | 54.55 | 100 |
| Botein, 2019 [84] | Egypt | Cross-sectional | Conventional / Gold Standard | ELISA/ELFA | PCR/qPCR | IgG | Serum | Pregnancy/antenatal | 115 minutes for 8 samples (hands-on 75 min; run 40 min) | Analytical + Clinical samples; lab-only evaluation |  |  | 6 | 30 | 5 | 59 | 54.55 | 66.29 |
| Döşkaya, 2019 [85] | Turkey | Cross-sectional | Conventional / Gold Standard | PCR/qPCR | PCR/qPCR | Nucleic acid (DNA) | Blood (unspecified) | General/mixed / other |  | Clinical Samples (retrospective lab-based analysis of routine/referral sera) | In-house analytical sensitivity: 1 parasite/reaction; Commercial analytical sensitivity: 10 copy plasmid/reaction | parasites/reaction; copies/reaction | 7 | 0 | 1 | 30 | 87.5 | 100 |
| Douet, 2019 [86] | France | Cross-sectional | Conventional / Gold Standard | Other / unclear | Immunoblot / Western blot | IgG | Serum | Other immunocompromised |  | Clinical samples (lab-only) |  |  | 82 | 39 | 0 | 233 | 100 | 85.66 |
| Douet, 2019 [86] | France | Cross-sectional | Conventional / Gold Standard | Other / unclear | Immunoblot / Western blot | IgG | Serum | Other immunocompromised |  | Clinical samples (lab-only) |  |  | 36 | 0 | 46 | 272 | 43.9 | 100 |
| Douet, 2019 [86] | France | Cross-sectional | Conventional / Gold Standard | ELISA/ELFA | Immunoblot / Western blot | IgG | Serum | Other immunocompromised |  | Clinical samples, lab-based (hospital specimens) |  |  | 30 | 0 | 52 | 272 | 36.59 | 100 |
| Douet, 2019 [86] | France | Cross-sectional | Conventional / Gold Standard | Other / unclear | Immunoblot / Western blot | IgG | Serum | Other immunocompromised |  | Clinical Samples; Lab-only |  |  | 27 | 2 | 55 | 270 | 32.93 | 99.26 |
| Douet, 2019 [86] | France | Cross-sectional | Conventional / Gold Standard | Other / unclear | Immunoblot / Western blot | IgG | Serum | Other immunocompromised |  | Clinical Samples; Lab-only |  |  | 38 | 9 | 44 | 263 | 46.34 | 96.69 |
| Douet, 2019 [86] | France | Cross-sectional | Conventional / Gold Standard | ELISA/ELFA | Immunoblot / Western blot | IgG | Serum | Other immunocompromised |  | Clinical Samples; Lab-only |  |  | 31 | 0 | 51 | 272 | 37.8 | 100 |
| Douet, 2019 [86] | France | Cross-sectional | Conventional / Gold Standard | Other / unclear | Immunoblot / Western blot | IgG | Serum | Other immunocompromised |  | Clinical Samples; Lab-only |  |  | 11 | 0 | 71 | 272 | 13.41 | 100 |
| Hanifehpour, 2019 [87] | Iran | Case-control | POCT | ELISA/ELFA | Other / unclear | IgG + IgM | Serum | General/mixed / other |  | Clinical Samples; Lab-only |  |  |  |  |  |  |  |  |
| Lévêque, 2019 [88] | France | Case report | Conventional / Gold Standard | PCR/qPCR | Composite / clinical adjudication | Nucleic acid (DNA) | Blood (unspecified) | General/mixed / other |  | Clinical Samples; Lab-only | 0.1 | Toxoplasma/ml |  |  |  |  |  |  |
| Martins, 2019 [89] | Brazil | Case report | Conventional / Gold Standard | Other / unclear | Serology (ELISA/ELFA/other) | IgG + IgM | Serum | General/mixed / other |  | Clinical Samples; Lab-only |  |  |  |  |  |  |  |  |
| Medawar-Aguilar, 2019 [90] | Argentina | Method development / analytical validation | POCT | Imaging | Serology (ELISA/ELFA/other) | IgG | Serum | General/mixed / other | LAMP amplification: 60 min (plus extraction); ELISA: NR | Clinical samples (lab-based) | 3.9×10^-4 | U/mL |  |  |  |  |  |  |
| Moghaddas, 2019 [91] | Iran | Cross-sectional | Conventional / Gold Standard | ELISA/ELFA | Composite / clinical adjudication | IgG avidity | Serum | Ocular toxoplasmosis / ophthalmology |  | Clinical Samples (case report); Analytical LOD referenced from spiked fluid work |  |  |  |  |  |  |  |  |
| Moghaddas, 2019 [91] | Iran | Cross-sectional | Conventional / Gold Standard | ELISA/ELFA | Composite / clinical adjudication | IgM | Serum | Ocular toxoplasmosis / ophthalmology |  | Clinical samples (single patient; case report) |  |  |  |  |  |  |  |  |
| Morovati et al., 2019 [92] | Iran | Diagnostic evaluation | POCT | LFIA / rapid immunoassay | Serology (ELISA/ELFA/other) | IgG | Serum | General/mixed / other | 31 min | Clinical Samples (small set; compared with commercial ELISA) | 01:08:00 | Serum dilution (1:x) | 61 | 1 | 0 | 29 | 100 | 96.67 |
| Olariu, 2019 [93] | USA | Cohort | Conventional / Gold Standard | ELISA/ELFA | Composite / clinical adjudication | Other / unclear | Serum | Pregnancy/antenatal | NR (ELISA; 30 min incubation step reported) | Clinical samples; lab-based ELISA |  |  | 61 | 20 | 24 | 523 | 71.76 | 96.32 |
| Rahimi Esboei, 2019 [94] | Iran | Cross-sectional | Conventional / Gold Standard | PCR/qPCR | Composite / clinical adjudication | Nucleic acid (DNA) | Blood (unspecified) | Ocular toxoplasmosis / ophthalmology |  | Clinical samples; lab-based ELISA | RE: 1; B1: 5 | tachyzoite/reaction |  |  |  |  |  |  |
| Takara, 2019 [95] | Argentina | Case-control | POCT | Other / unclear | Serology (ELISA/ELFA/other) | IgG | Serum | General/mixed / other | 10 min | Clinical Samples (lab-based) | 0.012 | U mL−1 |  |  |  |  |  |  |
| Thangarajah, 2019 [96] | Malaysia | Diagnostic evaluation | Conventional / Gold Standard | Other / unclear | Composite / clinical adjudication | IgG + IgM | Serum | Pregnancy/antenatal |  | Clinical Samples (Lab-only reference lab; retrospective) |  |  |  |  |  |  |  |  |
| Vargas-Montes, 2019 [97] | Colombia | Case-control | Conventional / Gold Standard | ELISA/ELFA | PCR/qPCR | Antigen | Serum | Congenital/newborn/infant |  | Clinical samples + Analytical (serial dilutions; cross-reactivity panel) | 1.56 | µg/mL | 14 |  | 48 |  | 22.58 |  |
| Wassef, 2019 [98] | Egypt | Cross-sectional | POCT | LFIA / rapid immunoassay | Serology (ELISA/ELFA/other) | IgG + IgM | Serum | Other immunocompromised | ≈25 min (5 min block + 10 min serum + 10 min anti-IgG–HRP; amperometry seconds; excludes electrode functionalization) | Clinical Samples (small set) + analytical validation |  |  | 74 | 10 | 26 | 70 | 74 | 87.5 |
| Ahmedani, 2020 [99] | Saudi Arabia | Cross-sectional | POCT | LAMP | PCR/qPCR | Nucleic acid (DNA) | Whole blood | General/mixed / other | Index assay time: NR; paired-serum algorithm requires 2-week interval for the second sample | Clinical Samples (hospital cohort; paired sera + records traced) | NR (dilution series 16000→2 copies/µL used for analytical sensitivity) | copies/µL | 7 |  | 4 |  | 63.64 |  |
| Ahmedani, 2020 [99] | Saudi Arabia | Cross-sectional | POCT | LAMP | PCR/qPCR | Nucleic acid (DNA) | Urine | General/mixed / other | Overnight coating + ~3 h 15 min assay (excl. wash time) | Analytical + Clinical samples | NR (dilution series 16000→2 copies/µL used for analytical sensitivity) | copies/µL | 10 |  | 1 |  | 90.91 |  |
| Ait Ammar, 2020 [100] | France | Retrospective | Conventional / Gold Standard | PCR/qPCR | Composite / clinical adjudication | Nucleic acid (DNA) | Whole blood | HIV/AIDS | 15 min | Clinical Samples; Lab-only |  |  | 88 | 0 | 1 | 106 | 98.88 | 100 |
| Brandão-de-Resende, 2020 [101] | Brazil | Cohort | Conventional / Gold Standard | Imaging | Serology (ELISA/ELFA/other) | Other / unclear | Other / unclear | General/mixed / other | ~62 min (65°C 60 min + 80°C 2 min) | Clinical samples + Lab-only analytical specificity/sensitivity |  |  |  |  |  |  |  |  |
| Chiquet, 2020 [102] | France | Cross-sectional | Conventional / Gold Standard | ELISA/ELFA | Immunoblot / Western blot | IgG | Serum | Ocular toxoplasmosis / ophthalmology | ~62 min (65°C 60 min + 80°C 2 min) | Clinical samples + Lab-only analytical specificity/sensitivity |  |  |  |  |  |  |  |  |
| de Oliveira Dias, 2020 [103] | Brazil | Case series | Conventional / Gold Standard | Imaging | Composite / clinical adjudication | Antigen | Ocular fluid | Ocular toxoplasmosis / ophthalmology |  | Clinical Samples (retrospective multicenter) |  |  |  |  |  |  |  |  |
| Echeverri, 2020 [104] | Colombia | Method development / analytical validation | POCT | Other / unclear | PCR/qPCR | IgG + IgM | Serum | General/mixed / other |  | Clinical samples (prospective observational cohort) | 0.31 | IU mL⁻¹ |  |  |  |  |  |  |
| Ferra, 2020 [105] | Poland | Diagnostic evaluation | Conventional / Gold Standard | ELISA/ELFA | Serology (ELISA/ELFA/other) | IgG | Serum | General/mixed / other | NR (not stated) | Clinical Samples (multicentre hospital-based) |  |  | 64 | 0 | 111 | 112 | 36.57 | 100 |
| Ferra, 2020 [105] | Poland | Diagnostic evaluation | Conventional / Gold Standard | ELISA/ELFA | Serology (ELISA/ELFA/other) | IgG | Serum | General/mixed / other |  | Clinical samples (prospective case series) |  |  | 148 | 0 | 27 | 112 | 84.57 | 100 |
| Ferra, 2020 [105] | Poland | Diagnostic evaluation | Conventional / Gold Standard | ELISA/ELFA | Serology (ELISA/ELFA/other) | IgG | Serum | General/mixed / other | ≈35 min pretreatment + binding incubation (EIS runtime not stated); sensor functionalization adds ~1 h + 30 min blocking | Analytical + clinical samples (lab-only proof-of-concept) |  |  | 174 | 0 | 1 | 112 | 99.43 | 100 |
| Ferra, 2020 [105] | Poland | Diagnostic evaluation | Conventional / Gold Standard | ELISA/ELFA | Serology (ELISA/ELFA/other) | IgG | Serum | General/mixed / other |  | Clinical samples, lab-only |  |  | 175 | 0 | 0 | 112 | 100 | 100 |
| Hegazy, 2020 [106] | Egypt | Other / unclear | Conventional / Gold Standard | ELISA/ELFA | Serology (ELISA/ELFA/other) | IgG | Serum | General/mixed / other |  | Clinical samples, lab-only |  |  | 55 | 0 | 0 | 46 | 100 | 100 |
| Hegazy, 2020 [106] | Egypt | Other / unclear | Conventional / Gold Standard | ELISA/ELFA | Serology (ELISA/ELFA/other) | IgG | Serum | General/mixed / other |  | Clinical samples, lab-only |  |  | 54 | 0 | 1 | 46 | 98.18 | 100 |
| Hegazy, 2020 [106] | Egypt | Other / unclear | Conventional / Gold Standard | ELISA/ELFA | Serology (ELISA/ELFA/other) | IgG | Serum | General/mixed / other |  | Clinical samples, lab-only |  |  | 53 | 0 | 2 | 46 | 96.36 | 100 |
| Hegazy, 2020 [106] | Egypt | Other / unclear | Conventional / Gold Standard | ELISA/ELFA | Serology (ELISA/ELFA/other) | IgG | Serum | General/mixed / other | Not fully stated; ELISA incubations total 15+15+5 min (+wash steps) | Clinical samples; lab-only validation under simulated storage scenarios |  |  | 51 | 0 | 4 | 46 | 92.73 | 100 |
| Hegazy, 2020 [106] | Egypt | Other / unclear | Conventional / Gold Standard | ELISA/ELFA | Serology (ELISA/ELFA/other) | IgG | Serum | General/mixed / other | Not fully stated; ELISA incubations 15+15+5 min (+wash) | Clinical samples; lab-only validation |  |  | 54 | 0 | 1 | 46 | 98.18 | 100 |
| Leroy, 2020 [107] | France | Case series | Conventional / Gold Standard | PCR/qPCR | PCR/qPCR | IgG + IgM | Serum | General/mixed / other | Not fully stated; ELISA incubations 15+15+5 min (+wash) | Clinical samples; lab-only validation |  |  |  |  |  |  |  |  |
| Morovati Khamsi, 2020 [108] | Iran | Diagnostic evaluation | POCT | LFIA / rapid immunoassay | Serology (ELISA/ELFA/other) | IgG | Serum | General/mixed / other | Not fully stated; ELISA incubations 15+15+5 min (+wash) | Clinical samples; lab-only validation |  |  |  |  |  |  |  |  |
| Ozcelik, 2020 [109] | Turkey | Cross-sectional | Conventional / Gold Standard | ELISA/ELFA | Serology (ELISA/ELFA/other) | IgG + IgM | Serum | General/mixed / other | Not fully stated; ELISA incubations 15+15+5 min (+wash) | Clinical samples; lab-only validation | N/S | N/S |  |  |  |  |  |  |
| Pomares, 2020 [110] | USA | Retrospective | Conventional / Gold Standard | PCR/qPCR | Not stated / none | Nucleic acid (DNA) | Whole blood | Congenital/newborn/infant |  | Clinical samples (retrospective, hospital-based case series) | N/S | N/S |  |  |  |  |  |  |
| Simon, 2020 [111] | France | Retrospective | Conventional / Gold Standard | Immunoblot / Western blot | Composite / clinical adjudication | IgG | Serum | General/mixed / other | 3 minutes | Clinical samples(+ cross-reactivity panel) |  |  |  |  |  |  |  |  |
| Soltani Tehrani, 2020 [112] | Iran | Cross-sectional | Conventional / Gold Standard | LAMP | Not stated / none | Other / unclear | Whole blood | Other immunocompromised | N/S | Clinical Samples | qPCR: 1 tachyzoite/mL; LAMP: 5 tachyzoites/mL | tachyzoites/mL (spiked seronegative blood) |  |  |  |  |  |  |
| Wang, 2020 [113] | Finland | Cohort | Conventional / Gold Standard | Other / unclear | Serology (ELISA/ELFA/other) | IgM | Serum | Pregnancy/antenatal | N/S | Clinical Samples (retrospective; lab-based) |  |  | 44 | 1 | 1 | 51 | 97.78 | 98.08 |
| Wang, 2020 [113] | Finland | Cohort | Conventional / Gold Standard | Other / unclear | Serology (ELISA/ELFA/other) | IgG avidity | Serum | HIV/AIDS |  | Clinical samples (lab-only; case–control) |  |  | 37 | 3 | 1 | 56 | 97.37 | 94.92 |
| Wang, 2020 [113] | Finland | Method development / analytical validation | Conventional / Gold Standard | Other / unclear | Serology (ELISA/ELFA/other) | IgM | Serum | HIV/AIDS |  | Clinical samples (lab-only; case–control) |  |  | 47 | 0 | 0 | 47 | 100 | 100 |
| Wang, 2020 [113] | Finland | Method development / analytical validation | Conventional / Gold Standard | Other / unclear | Serology (ELISA/ELFA/other) | IgG avidity | Serum | HIV/AIDS |  | N (IgG-only focus; no acute/chronic differentiation described) |  |  | 47 | 0 | 0 | 47 | 100 | 100 |
| Wang, 2020 [113] | Finland | Method development / analytical validation | Conventional / Gold Standard | Other / unclear | Serology (ELISA/ELFA/other) | IgM | Serum | HIV/AIDS | LAMP: 1 h (63°C) | Clinical Samples + Analytical (spiked blood dilution series + analytical specificity with other-parasite DNA) |  |  | 38 | 0 | 2 | 87 | 95 | 100 |
| Wang, 2020 [113] | Finland | Method development / analytical validation | Conventional / Gold Standard | Other / unclear | Serology (ELISA/ELFA/other) | IgG avidity | Serum | General/mixed / other |  | Clinical Samples (archival panel) |  |  | 36 | 0 | 3 | 55 | 92.31 | 100 |
| Ybañez, 2020 [114] | Philippines | Cross-sectional | POCT | LFIA / rapid immunoassay | Serology (ELISA/ELFA/other) | IgG + IgM | Serum | General/mixed / other |  | Clinical Samples (archival panel) |  |  | 27 | 0 | 2 | 59 | 93.1 | 100 |
| Ybañez, 2020 [114] | Philippines | Cross-sectional | POCT | LFIA / rapid immunoassay | Serology (ELISA/ELFA/other) | IgG + IgM | Serum | General/mixed / other |  | Clinical Samples (archival panel) |  |  | 27 | 0 | 2 | 59 | 93.1 | 100 |
| Ben-Abdallah, 2021 [115] | Tunisia | Retrospective | POCT | LFIA / rapid immunoassay | Immunoblot / Western blot | IgG + IgM | Serum | Pregnancy/antenatal |  | Clinical Samples (archival panel) |  |  | 17 | 1 | 0 | 1 | 100 | 50 |
| Ben-Abdallah, 2021 [115] | Tunisia | Retrospective | POCT | LFIA / rapid immunoassay | Composite / clinical adjudication | IgG + IgM | Serum | Pregnancy/antenatal |  | Clinical Samples (archival panel + student negatives) |  |  | 7 | 3 | 0 | 10 | 100 | 76.92 |
| Brenier-Pinchart, 2021 [116] | France | Prospective | Conventional / Gold Standard | PCR/qPCR | PCR/qPCR | Antigen | Whole blood | Congenital/newborn/infant |  | Clinical Samples (archival panel) | ~0.01 | T. gondii genome equivalents per reaction | 72 | 2 | 1 | 58 | 98.63 | 96.67 |
| El Mansouri, 2021 [117] | Morocco | Cross-sectional | POCT | LFIA / rapid immunoassay | Serology (ELISA/ELFA/other) | IgG + IgM | Serum | Pregnancy/antenatal | 20 min | Clinical samples; Lab-only validation |  |  | 108 | 1 | 4 | 236 | 96.43 | 99.58 |
| El Mansouri, 2021 [117] | Morocco | Cross-sectional | POCT | LFIA / rapid immunoassay | Immunoblot / Western blot | IgG + IgM | Serum | Pregnancy/antenatal | 20 minutes | Clinical samples (lab-only testing of stored sera) |  |  | 108 | 1 | 4 | 236 | 96.43 | 99.58 |
| El-Sayad, 2021 [118] | Egypt | Cross-sectional | Conventional / Gold Standard | PCR/qPCR | Serology (ELISA/ELFA/other) | Nucleic acid (DNA) | Serum | General/mixed / other |  | Clinical samples (lab-only; routine screening sera) |  |  | 43 | 3 | 30 | 24 | 58.9 | 88.89 |
| Hashemi, 2021 [119] | Iran | Cross-sectional | Conventional / Gold Standard | PCR/qPCR | Serology (ELISA/ELFA/other) | Nucleic acid (DNA) | Whole blood | Other immunocompromised |  | Clinical samples (lab-only; routine screening sera) |  |  | 26 | 20 | 35 | 73 | 42.62 | 78.49 |
| Hashemi, 2021 [119] | Iran | Cross-sectional | POCT | LAMP | Serology (ELISA/ELFA/other) | Nucleic acid (DNA) | Whole blood | Other immunocompromised |  | Clinical Samples + Analytical evaluation (standards/EQA) |  |  | 34 | 18 | 27 | 74 | 55.74 | 80.43 |
| Khalili Pour, 2021 [120] | Iran | Case report | Conventional / Gold Standard | ELISA/ELFA | Composite / clinical adjudication | IgG + IgM | Blood (unspecified) | Ocular toxoplasmosis / ophthalmology | 20 minutes | Clinical samples; multi-site field/community implementation; additional blinded WB validation on matrix-study samples | N/S | N/S |  |  |  |  |  |  |
| Kheirandish, 2021 [121] | Iran | Cross-sectional | POCT | LAMP | Serology (ELISA/ELFA/other) | Nucleic acid (DNA) | Blood (unspecified) | General/mixed / other | 20 minutes | Clinical samples; pilot field/community implementation |  |  | 5 | 0 | 3 | 132 | 62.5 | 100 |
| Lijeskić, 2021 [122] | Serbia | Case series | Conventional / Gold Standard | PCR/qPCR | Composite / clinical adjudication | IgG avidity | Serum | Ocular toxoplasmosis / ophthalmology |  | Clinical samples |  |  |  |  |  |  |  |  |
| Logroño Wiese, 2021 [123] | Germany | Cross-sectional | POCT | Imaging | Serology (ELISA/ELFA/other) | Other / unclear | Serum | General/mixed / other |  | Clinical samples (hospital patients) |  |  |  |  |  |  |  |  |
| Logroño Wiese, 2021 [123] | Germany | Cross-sectional | Conventional / Gold Standard | Imaging | Serology (ELISA/ELFA/other) | Other / unclear | Serum | Ocular toxoplasmosis / ophthalmology | 60 min amplification (reaction time; excludes extraction) | Clinical samples (hospital patients) |  |  |  |  |  |  |  |  |
| Mirahmadi, 2021 [124] | Iran | Cross-sectional | Conventional / Gold Standard | PCR/qPCR | Not stated / none | Nucleic acid (DNA) | Plasma | Other immunocompromised | N/S | Clinical Samples (single-patient case report) |  |  |  |  |  |  |  |  |
| Nourrisson, 2021 [125] | France | Retrospective | Conventional / Gold Standard | PCR/qPCR | Composite / clinical adjudication | Nucleic acid (DNA) | Plasma | Congenital/newborn/infant | 60 min (amplification; excluding extraction) | Clinical Samples (Lab-only) | 1 (analytical detection threshold definition: lowest dilution with ≥50% positive tubes) | parasite/mL |  |  |  |  |  |  |
| Nourrisson, 2021 [125] | France | Retrospective | Conventional / Gold Standard | PCR/qPCR | Composite / clinical adjudication | Nucleic acid (DNA) | Plasma | Congenital/newborn/infant | NR (bioassay evaluated at ~6 weeks; qPCR/serology time not reported) | Clinical samples | 0.1 (analytical detection threshold definition: lowest dilution with ≥50% positive tubes) | parasite/mL |  |  |  |  |  |  |
| Parra, 2021 [126] | Paraguay | Retrospective | Machine Learning | Imaging | Composite / clinical adjudication | Other / unclear | Other / unclear | General/mixed / other | <7 min per person (image capture <0.4 s) | Pilot Field (clinical screening) | Not applicable | Not applicable |  |  |  |  |  |  |
| Safarpour, 2021 [127] | Iran | Method development / analytical validation | POCT | Other / unclear | Serology (ELISA/ELFA/other) | IgG + IgM | Serum | Pregnancy/antenatal | Image capture <0.4 s; total exam time <7 min/person | Pilot Field (clinic-based screening in real patients) | IgG: 2; IgM: 10 | IU/mL |  |  |  |  |  |  |
| Sousa, 2021 [128] | Portugal | Method development / analytical validation | POCT | Other / unclear | Serology (ELISA/ELFA/other) | Nucleic acid (DNA) | Serum | General/mixed / other |  | Analytical + Clinical samples (lab-only): standard curve from RH strain + human blood testing | 0.481 | Not specified (reported as LOD value; unit not provided) |  |  |  |  |  |  |
| Souza, 2021 [129] | Brazil | Prospective | Conventional / Gold Standard | ELISA/ELFA | Immunoblot / Western blot | IgG avidity | Serum | Congenital/newborn/infant | ~2.5 hours (setup to result) | Analytical Only + Clinical Samples (retrospective) |  |  |  |  |  |  |  |  |
| Steinberg, 2021 [130] | Peru | Method development / analytical validation | Conventional / Gold Standard | Immunoblot / Western blot | PCR/qPCR | Nucleic acid (DNA) | Urine | HIV/AIDS | ~2.5 hours (setup to result) | Analytical Only + Clinical Samples (retrospective) | 7.8 | pg/mL | 5 | 1 | 6 | 29 | 45.45 | 96.67 |
| Steinberg, 2021 [130] | Peru | Method development / analytical validation | Conventional / Gold Standard | Immunoblot / Western blot | PCR/qPCR | Nucleic acid (DNA) | Urine | HIV/AIDS |  | Clinical samples (retrospective labeled images) | 31.3 | pg/mL | 0 | 3 | 11 | 27 | 0 | 90 |
| SUN Working Group, 2021 [131] | USA | Method development / analytical validation | Machine Learning | PCR/qPCR | Composite / clinical adjudication | Other / unclear | Serum | Ocular toxoplasmosis / ophthalmology | ~2 h 30 min to ~3 h (derived from stated incubation steps; excludes washing/handling variability) | Analytical + Clinical Samples (very limited; lab-only n=4) |  |  |  |  |  |  |  |  |
| Trotta, 2021 [132] | Italy | Cohort | Conventional / Gold Standard | PCR/qPCR | Composite / clinical adjudication | Nucleic acid (DNA) | Amniotic fluid | Pregnancy/antenatal | ~2 h serum incubation + overnight incubation after NaCl addition (≈16 h, not explicitly quantified) | Lab-only + Clinical samples (retrospective pooled human sera; proof-of-concept; broader validation stated as ongoing) |  |  | 1 | 0 | 0 | 212 | 100 | 100 |
| Wu, 2021 [133] | China | Cross-sectional | Conventional / Gold Standard | PCR/qPCR | Composite / clinical adjudication | Other / unclear | Mixed specimens | General/mixed / other | NR (protocol includes 30-min incubation + additional steps in ELISA workflow) | Clinical Samples (newborn DBS) + Lab-only method adaptation/standardization | 5 | copies/µL (spiked sputum matrix) | 31 | 6 | 0 | 55 | 100 | 90.16 |
| Wu, 2021 [133] | China | Cross-sectional | Conventional / Gold Standard | PCR/qPCR | Composite / clinical adjudication | Other / unclear | Blood (unspecified) | General/mixed / other | ≥45 min (nanoparticle capture) + Western blot workflow (hours) | Analytical + Clinical Samples (hospital cohort; proof-of-concept) | 10 | copies/µL (spiked sputum matrix) | 2 | 0 | 0 | 20 | 100 | 100 |
| Zhao, 2021 [134] | China | Cross-sectional | POCT | LFIA / rapid immunoassay | PCR/qPCR | Other / unclear | Serum | General/mixed / other | ≥45 min (nanoparticle capture) + Western blot workflow (hours; SAG1 primary antibody incubation described as longer/overnight in protocol context) | Analytical + Clinical Samples (hospital cohort; proof-of-concept) | 1×10⁻⁶ | ng/µL | 4 | 0 | 0 | 263 | 100 | 100 |
| Aerts, 2022 [135] | Belgium | Case-control | Conventional / Gold Standard | PCR/qPCR | Composite / clinical adjudication | Nucleic acid (DNA) | Blood (unspecified) | General/mixed / other |  | Clinical samples (retrospective case collection); internal validation on held-out validation set |  |  |  |  |  |  |  |  |
| Azimi, 2022 [136] | Iran | Cross-sectional | Conventional / Gold Standard | ELISA/ELFA | Serology (ELISA/ELFA/other) | IgG avidity | Serum | Pregnancy/antenatal |  | Clinical Samples (retrospective cohort) |  |  |  |  |  |  |  |  |
| Brenier-Pinchart, 2022 [137] | France | Retrospective | Conventional / Gold Standard | PCR/qPCR | Composite / clinical adjudication | Nucleic acid (DNA) | Serum | Congenital/newborn/infant | ≈45 min (qPCR cycling only; sample prep not included) | Analytical + Clinical Samples | 0.01–1 | Tachyzoites/mL | 133 | 0 | 3 | 27 | 97.79 | 100 |
| Brenier-Pinchart, 2022 [137] | France | Retrospective | Conventional / Gold Standard | PCR/qPCR | Composite / clinical adjudication | Nucleic acid (DNA) | Serum | Congenital/newborn/infant | ≈45 min (qPCR cycling only; sample prep not included) | Analytical + Clinical Samples | 0.01–1 | tachyzoites/mL | 133 | 0 | 3 | 27 | 97.79 | 100 |
| Jean-Pierre, 2022 [138] | France | Retrospective | Conventional / Gold Standard | Immunoblot / Western blot | Serology (ELISA/ELFA/other) | IgG | Serum | General/mixed / other | ≤2 h (excluding DNA extraction) | Clinical Samples + Analytical (plasmid dilutions) |  |  | 33 | 0 | 1 | 16 | 97.06 | 100 |
| Jean-Pierre, 2022 [138] | France | Retrospective | Conventional / Gold Standard | Immunoblot / Western blot | Serology (ELISA/ELFA/other) | IgG | Serum | General/mixed / other |  | Clinical samples (routine clinical monitoring; retrospective evaluation) |  |  | 18 | 2 | 13 | 14 | 58.06 | 87.5 |
| Jean-Pierre, 2022 [138] | France | Retrospective | Conventional / Gold Standard | Immunoblot / Western blot | Serology (ELISA/ELFA/other) | IgG | Serum | Pregnancy/antenatal |  | Clinical samples (cross-sectional serology on pregnant women) |  |  |  |  |  |  |  |  |
| Kim, 2022 [139] | Republic of Korea | Diagnostic evaluation | Conventional / Gold Standard | ELISA/ELFA | Other / unclear | IgG | Serum | General/mixed / other |  | Analytical + Clinical Samples (multicenter lab-only evaluation; includes calibrated standards and external quality controls) |  |  |  |  |  |  |  |  |
| Ksiaa, 2022 [140] | Tunisia | Prospective | Other / hybrid | Imaging | Composite / clinical adjudication | Other / unclear | Ocular fluid | General/mixed / other |  | Clinical samples + analytical standards/EQC; multicenter lab evaluation |  |  | 39 | 1 | 4 | 53 | 90.7 | 98.15 |
| Lévêque, 2022 [141] | France | Retrospective | Conventional / Gold Standard | ELISA/ELFA | Composite / clinical adjudication | Other / unclear | Serum | Pregnancy/antenatal |  | Clinical samples; Lab-only (retrospective) |  |  | 172 | 15 | 112 | 204 | 60.56 | 93.15 |
| Meroni, 2022 [142] | France | Retrospective | Conventional / Gold Standard | Immunoblot / Western blot | Composite / clinical adjudication | IgG | Serum | Pregnancy/antenatal |  | Clinical samples; Lab-only (retrospective) |  |  | 92 | 0 | 1 | 68 | 98.92 | 100 |
| Meroni, 2022 [142] | France | Retrospective | Conventional / Gold Standard | Immunoblot / Western blot | Composite / clinical adjudication | IgM | Serum | Pregnancy/antenatal |  | Clinical samples; Lab-only (retrospective) |  |  | 91 | 7 | 2 |  | 97.85 | 0 |
| Meroni, 2022 [142] | France | Retrospective | Conventional / Gold Standard | Immunoblot / Western blot | Composite / clinical adjudication | IgM | Serum | Pregnancy/antenatal | Overnight coating + ~4 h incubations (block 1 h + primary 2 h + secondary 1 h; substrate time NR) | Clinical samples (human sera) + Lab-only (mouse infection) |  |  |  |  |  |  |  |  |
| Mirahmadi, 2022 [143] | Iran | Case-control | POCT | LAMP | Serology (ELISA/ELFA/other) | Nucleic acid (DNA) | Blood (unspecified) | Other immunocompromised | NR (same-day imaging; acquisition time not reported) | Clinical samples (prospective diagnostic) |  |  | 29 | 32 | 85 | 174 | 25.44 | 84.47 |
| Rodrigues, 2022 [144] | Brazil | Cross-sectional | Conventional / Gold Standard | Other / unclear | Serology (ELISA/ELFA/other) | IgG + IgM | Serum | Pregnancy/antenatal |  | Clinical samples (retrospective multicenter; routine practice) |  |  |  |  |  |  |  |  |
| Stajner, 2022 [145] | Serbia | Cohort | Conventional / Gold Standard | PCR/qPCR | Composite / clinical adjudication | Nucleic acid (DNA) | Blood (unspecified) | General/mixed / other |  | Clinical Samples (retrospective multicentre) | 1 | tachyzoite/mL |  |  |  |  |  |  |
| Yéngué, 2022 [146] | Cameroon | Cross-sectional | POCT | LFIA / rapid immunoassay | Serology (ELISA/ELFA/other) | IgG | Serum | Pregnancy/antenatal |  | Clinical Samples (retrospective multicentre) |  |  | 33 | 6 | 241 | 61 | 12.04 | 91.04 |
| Yéngué, 2022 [146] | Cameroon | Cross-sectional | POCT | LFIA / rapid immunoassay | Serology (ELISA/ELFA/other) | IgG | Serum | Pregnancy/antenatal |  | Clinical Samples (retrospective multicentre) |  |  | 263 | 24 | 11 | 43 | 95.99 | 64.18 |
| Yéngué, 2022 [146] | Cameroon | Cross-sectional | Conventional / Gold Standard | ELISA/ELFA | Serology (ELISA/ELFA/other) | IgG | Serum | Pregnancy/antenatal | 30–75 min (assay optimization range) | Clinical samples (lab-based case-control) |  |  | 267 | 27 | 7 | 40 | 97.45 | 59.7 |
| Yéngué, 2022 [146] | Cameroon | Cross-sectional | Conventional / Gold Standard | ELISA/ELFA | Serology (ELISA/ELFA/other) | IgG | Serum | Pregnancy/antenatal | <10 minutes for quantification/readout of 384 wells (total workflow time NR) | Clinical samples (public hospital) |  |  | 140 | 13 | 7 | 40 | 95.24 | 75.47 |
| Yéngué, 2022 [146] | Cameroon | Cross-sectional | POCT | LFIA / rapid immunoassay | Serology (ELISA/ELFA/other) | IgG | Serum | Pregnancy/antenatal |  | Clinical Samples |  |  | 139 | 2 | 8 | 51 | 94.56 | 96.23 |
| Yéngué, 2022 [146] | Cameroon | Cross-sectional | Conventional / Gold Standard | ELISA/ELFA | Serology (ELISA/ELFA/other) | IgG | Serum | Pregnancy/antenatal |  | Clinical Samples (hospital + reference lab) |  |  | 146 | 16 | 1 | 37 | 99.32 | 69.81 |
| Yéngué, 2022 [146] | Cameroon | Cross-sectional | POCT | LFIA / rapid immunoassay | Serology (ELISA/ELFA/other) | IgM | Serum | Pregnancy/antenatal |  | Clinical Samples (hospital + reference lab) |  |  | 1 | 26 | 2 | 312 | 33.33 | 92.31 |
| Yéngué, 2022 [146] | Cameroon | Cross-sectional | POCT | LFIA / rapid immunoassay | Serology (ELISA/ELFA/other) | IgM | Serum | Pregnancy/antenatal |  | Clinical Samples (hospital + reference lab) |  |  | 1 | 1 | 2 | 337 | 33.33 | 99.7 |
| Yéngué, 2022 [146] | Cameroon | Cross-sectional | Conventional / Gold Standard | ELISA/ELFA | Serology (ELISA/ELFA/other) | IgM | Serum | Pregnancy/antenatal |  | Clinical Samples (hospital + reference lab) |  |  | 1 | 0 | 2 | 338 | 33.33 | 100 |
| Yéngué, 2022 [146] | Cameroon | Cross-sectional | Conventional / Gold Standard | ELISA/ELFA | Serology (ELISA/ELFA/other) | IgM | Serum | Pregnancy/antenatal |  | Clinical Samples (hospital + reference lab) |  |  | 3 | 17 | 5 | 175 | 37.5 | 91.15 |
| Yéngué, 2022 [146] | Cameroon | Cross-sectional | POCT | LFIA / rapid immunoassay | Serology (ELISA/ELFA/other) | IgM | Serum | Pregnancy/antenatal |  | Clinical Samples (hospital + reference lab) |  |  | 2 | 6 | 6 | 186 | 25 | 96.88 |
| Yéngué, 2022 [146] | Cameroon | Cross-sectional | Conventional / Gold Standard | ELISA/ELFA | Serology (ELISA/ELFA/other) | IgM | Serum | Pregnancy/antenatal |  | Clinical Samples (hospital + reference lab) |  |  | 1 | 3 | 7 | 189 | 12.5 | 98.44 |
| Zhao, 2022 [147] | China | Cross-sectional | POCT | LFIA / rapid immunoassay | PCR/qPCR | Other / unclear | Serum | Pregnancy/antenatal |  | Clinical Samples (hospital + reference lab) | 1 × 10^6 | ng/µL (analytical LOD using diluted recombinant plasmid standard) | 4 | 0 | 0 | 263 | 100 | 100 |
| Abraham, 2023 [148] | USA | Prospective | POCT | LFIA / rapid immunoassay | Composite / clinical adjudication | IgG + IgM | Serum | Other immunocompromised |  | Clinical Samples (hospital + reference lab) |  |  | 151 | 0 | 1 | 1218 | 99.34 | 100 |
| Aly, 2023 [149] | Egypt | Diagnostic evaluation | Conventional / Gold Standard | ELISA/ELFA | Composite / clinical adjudication | Nucleic acid (DNA) | Serum | Pregnancy/antenatal |  | Clinical Samples (hospital + reference lab) |  |  | 31 | 6 | 6 | 44 | 83.78 | 88 |
| Aly, 2023 [149] | Egypt | Diagnostic evaluation | Conventional / Gold Standard | ELISA/ELFA | Composite / clinical adjudication | Nucleic acid (DNA) | Serum | Pregnancy/antenatal |  | Clinical Samples (hospital + reference lab) |  |  | 33 | 3 | 4 | 47 | 89.19 | 94 |
| Aly, 2023 [149] | Egypt | Diagnostic evaluation | Conventional / Gold Standard | PCR/qPCR | Composite / clinical adjudication | Nucleic acid (DNA) | Whole blood | Pregnancy/antenatal |  | Clinical Samples (hospital + reference lab) |  |  | 36 | 0 | 1 | 50 | 97.3 | 100 |
| Canedo-Solares, 2023 [150] | Mexico | Case-control | Conventional / Gold Standard | ELISA/ELFA | PCR/qPCR | IgG | Serum | Congenital/newborn/infant | ≤2 hours at 37°C (LFD visual readout by naked eye) | Clinical Samples (lab-based) + analytical evaluation (LOD/specificity panel) |  |  | 22 | 3 | 5 | 10 | 81.48 | 76.92 |
| Cardozo, 2023 [151] | Paraguay | Other / unclear | Machine Learning | Imaging | Composite / clinical adjudication | Other / unclear | Mixed specimens | Congenital/newborn/infant | 20–30 minutes | Clinical samples (human sera; prospective + selected panels) |  |  |  |  |  |  |  |  |
| Dambrun, 2023 [152] | Benin | Cross-sectional | Conventional / Gold Standard | ELISA/ELFA | Serology (ELISA/ELFA/other) | IgG + IgM | Plasma | Pregnancy/antenatal |  | Clinical samples (lab-based) |  |  |  |  |  |  |  |  |
| Dambrun, 2023 [152] | Benin | Cross-sectional | Conventional / Gold Standard | ELISA/ELFA | Composite / clinical adjudication | IgG + IgM | Plasma | Pregnancy/antenatal |  | Clinical samples (lab-based) |  |  |  |  |  |  |  |  |
| Dragomir, 2023 [153] | Romania | Other / unclear | Conventional / Gold Standard | Agglutination | Not stated / none | IgG + IgM | Serum | General/mixed / other |  | Clinical samples (lab-based) |  |  |  |  |  |  |  |  |
| Hosseini, 2023 [154] | Iran | Other / unclear | Conventional / Gold Standard | PCR/qPCR | PCR/qPCR | IgG + IgM | Serum | Pregnancy/antenatal |  | Clinical samples; Lab-only (stored sera; ELISA + ROC/logistic regression) |  |  |  |  |  |  |  |  |
| Londoño-Martinez, 2023 [155] | Colombia | Prospective | POCT | LFIA / rapid immunoassay | Serology (ELISA/ELFA/other) | IgG + IgM | Whole blood | Pregnancy/antenatal | Not applicable / not reported | Clinical samples (two hospital centers; dataset creation; no diagnostic accuracy validation reported) |  |  | 192 | 0 | 7 | 214 | 96.48 | 100 |
| Londoño-Martinez, 2023 [155] | Colombia | Prospective | POCT | LFIA / rapid immunoassay | Serology (ELISA/ELFA/other) | IgG + IgM | Blood (unspecified) | Pregnancy/antenatal |  | Clinical samples; lab-based comparative evaluation (plus reproducibility controls) |  |  |  |  |  |  |  |  |
| Nabet, 2023 [156] | France | Retrospective | Conventional / Gold Standard | PCR/qPCR | PCR/qPCR | Nucleic acid (DNA) | Blood (unspecified) | Congenital/newborn/infant |  | Clinical samples; lab-based comparative evaluation | Not reported (LOQ for a-tubulin quantification reported as 170 copies/mL DNA eluate) | copies/mL (DNA eluate) | 35 | 5 | 0 | 110 | 100 | 95.65 |
| Sofia, 2023 [157] | Indonesia | Case series | Conventional / Gold Standard | Imaging | Composite / clinical adjudication | Other / unclear | Other / unclear | Ocular toxoplasmosis / ophthalmology |  | Clinical Samples (hospital patients + blood donors; ex vivo serology) | N/S | N/S |  |  |  |  |  |  |
| Abedian, 2024 [158] | Iran | Cohort | Conventional / Gold Standard | ELISA/ELFA | Other / unclear | IgG avidity | Plasma | Pregnancy/antenatal |  | Clinical Samples; Lab-only (hospital/archived specimen testing) |  |  |  |  |  |  |  |  |
| Abedian, 2024 [158] | Iran | Cohort | Conventional / Gold Standard | PCR/qPCR | PCR/qPCR | Nucleic acid (DNA) | Amniotic fluid | Pregnancy/antenatal | 20–30 minutes | Pilot Field / Clinical samples (primary care prenatal clinics; real-world implementation) | 10 | pg |  |  |  |  |  |  |
| Aktas, 2024 [159] | Turkey | Case report | Conventional / Gold Standard | Imaging | Composite / clinical adjudication | IgG + IgM | Serum | Ocular toxoplasmosis / ophthalmology | 20–30 min | Pilot field / clinical samples (primary care implementation; phase III translational) |  |  |  |  |  |  |  |  |
| Cifuentes-Gonzalez, 2024 [160] | Colombia | Cross-sectional | Machine Learning | Imaging | Composite / clinical adjudication | Other / unclear | Other / unclear | General/mixed / other |  | Clinical Samples; Lab-only (retrospective) |  |  | 40 |  |  | 23 | 100 | 100 |
| Datta, 2024 [161] | India | Prospective | POCT | PCR/qPCR | Serology (ELISA/ELFA/other) | Nucleic acid (DNA) | Serum | Pregnancy/antenatal | N/S (scan acquisition time not reported) | Clinical samples (case series; in vivo patients) | qPCR: B1 100; RE-529 10; LAMP: B1 10; RE-529 1 | fg DNA |  |  |  |  |  |  |
| Deleplancque, 2024 [162] | France | Retrospective | Conventional / Gold Standard | Agglutination | Serology (ELISA/ELFA/other) | IgM | Serum | General/mixed / other |  | Clinical samples |  |  | 149 | 154 | 7 | 1031 | 95.51 | 87 |
| Deleplancque, 2024 [162] | France | Retrospective | Conventional / Gold Standard | ELISA/ELFA | Composite / clinical adjudication | IgM | Serum | General/mixed / other |  | Clinical samples + Analytical validation |  |  | 81 | 38 | 15 | 750 | 84.38 | 95.18 |
| Deleplancque, 2024 [162] | France | Retrospective | Conventional / Gold Standard | ELISA/ELFA | Composite / clinical adjudication | IgM | Serum | General/mixed / other | -- | Clinical samples (single-patient case report) |  |  | 43 | 123 | 4 | 243 | 91.49 | 66.39 |
| Deleplancque, 2024 [162] | France | Retrospective | Conventional / Gold Standard | ELISA/ELFA | Composite / clinical adjudication | IgM | Serum | General/mixed / other |  | Clinical images (retrospective) + external validation on unseen ASRS Image Bank images |  |  | 7 | 16 | 4 | 51 | 63.64 | 76.12 |
| Deleplancque, 2024 [162] | France | Retrospective | Conventional / Gold Standard | ELISA/ELFA | Composite / clinical adjudication | IgM | Serum | General/mixed / other | LAMP run time: 60 min; qPCR: NR | Analytical (serial dilutions) + Clinical Samples (antenatal blood) |  |  | 16 | 30 | 2 | 11 | 88.89 | 26.83 |
| Deleplancque, 2024 [162] | France | Retrospective | Conventional / Gold Standard | Agglutination | Other / unclear | IgM | Serum | Congenital/newborn/infant |  | Clinical samples (retrospective, multicenter) |  |  | 451 | 8 | 264 | 483 | 63.08 | 98.37 |
| Deleplancque, 2024 [162] | France | Retrospective | Conventional / Gold Standard | ELISA/ELFA | Other / unclear | IgM | Serum | Congenital/newborn/infant |  | Clinical samples (retrospective) |  |  |  |  |  |  |  |  |
| Deleplancque, 2024 [162] | France | Retrospective | Conventional / Gold Standard | ELISA/ELFA | Other / unclear | IgM | Serum | Congenital/newborn/infant |  | Clinical samples (retrospective) |  |  |  |  |  |  |  |  |
| Deleplancque, 2024 [162] | France | Retrospective | Conventional / Gold Standard | ELISA/ELFA | Other / unclear | IgM | Serum | Congenital/newborn/infant |  | Clinical samples (retrospective) |  |  |  |  |  |  |  |  |
| Eraghi, 2024 [163] | Germany | Cohort | Conventional / Gold Standard | Other / unclear | Composite / clinical adjudication | Other / unclear | Ocular fluid | Ocular toxoplasmosis / ophthalmology |  | Clinical samples (retrospective) |  |  |  |  |  |  |  |  |
| Guitard, 2024 [164] | France | Retrospective | Conventional / Gold Standard | PCR/qPCR | PCR/qPCR | Nucleic acid (DNA) | Blood (unspecified) | Congenital/newborn/infant |  | Clinical samples (retrospective, multicenter) | 0.01 to ≤1 | T. gondii genome/mL (T/mL) | 106 |  |  | 67 | 100 | 100 |
| Gulshan, 2024 [165] | Bangladesh | Case-control | POCT | ELISA/ELFA | Not stated / none | IgG + IgM | Serum | General/mixed / other |  | Clinical samples (retrospective) |  |  |  |  |  |  |  |  |
| Hurt, 2024 [166] | Czech Republic | Cohort | Conventional / Gold Standard | ELISA/ELFA | Serology (ELISA/ELFA/other) | IgG + IgM | Blood (unspecified) | Pregnancy/antenatal |  | Clinical samples (retrospective) |  |  | 62 | 344 | 128 | 1113 | 32.63 | 76.39 |
| Kamel, 2024 [167] | Egypt | Cohort | Conventional / Gold Standard | PCR/qPCR | PCR/qPCR | Other / unclear | Serum | General/mixed / other |  | Clinical samples (retrospective) |  |  |  |  |  |  |  |  |
| Li, 2024 [168] | China | Diagnostic evaluation | POCT | LFIA / rapid immunoassay | Serology (ELISA/ELFA/other) | IgG | Serum | General/mixed / other |  | Clinical Samples (retrospective human cohort) | 1 (analyzer under UV); 4 (visual UV); 4–8 (visual natural light) | IU/mL | 33 | 0 | 2 | 65 | 94.29 | 100 |
| Mikita et al. , 2024 [169] | Japan | Diagnostic evaluation | POCT | LAMP | Composite / clinical adjudication | Nucleic acid (DNA) | Blood (unspecified) | Congenital/newborn/infant |  | Analytical + Clinical samples | 1 | parasite/µL | 15 | 0 | 7 | 69 | 68.18 | 100 |
| Mikita et al. , 2024 [169] | Japan | Diagnostic evaluation | POCT | LAMP | Composite / clinical adjudication | Nucleic acid (DNA) | Blood (unspecified) | Congenital/newborn/infant | Rapid test readout: 15 min | Clinical Samples | 1 | parasite/µL | 14 | 0 | 8 | 69 | 63.64 | 100 |
| Mikita et al. , 2024 [169] | Japan | Diagnostic evaluation | Conventional / Gold Standard | PCR/qPCR | Composite / clinical adjudication | Nucleic acid (DNA) | Blood (unspecified) | Congenital/newborn/infant |  | Clinical samples (retrospective cohort; routine screening) | 1 | parasite/µL | 10 | 2 | 12 | 67 | 45.45 | 97.1 |
| Milad, 2024 [170] | Canada | Retrospective | Machine Learning | Imaging | Composite / clinical adjudication | Other / unclear | Other / unclear | Ocular toxoplasmosis / ophthalmology |  | Clinical samples (hospital cohort) |  |  | 187 | 20 | 0 | 97 | 100 | 82.91 |
| Ota, 2024 [171] | Japan | Cohort | Conventional / Gold Standard | ELISA/ELFA | Other / unclear | IgG avidity | Serum | Pregnancy/antenatal | ~12 min (after sample application; 5 min pre-incubation) | Clinical samples (n=100) + analytical spiked-serum evaluation |  |  |  |  |  |  |  |  |
| Ramos, 2024 [172] | Brazil | Diagnostic evaluation | Conventional / Gold Standard | ELISA/ELFA | Other / unclear | IgM | Serum | Ocular toxoplasmosis / ophthalmology | Amplification 40 min + strip readout (minutes not reported) | Clinical Samples (lab-only diagnostic testing) |  |  | 6 | 7 | 2 | 145 | 75 | 95.39 |
| Ramos, 2024 [172] | Brazil | Diagnostic evaluation | Conventional / Gold Standard | ELISA/ELFA | Other / unclear | IgG | Serum | Ocular toxoplasmosis / ophthalmology | 40 min amplification + 5 min inactivation (≈45 min) | Clinical Samples (lab-only diagnostic testing) |  |  | 98 | 7 | 1 | 54 | 98.99 | 88.52 |
| Ramos, 2024 [172] | Brazil | Diagnostic evaluation | Conventional / Gold Standard | Immunofluorescence | Serology (ELISA/ELFA/other) | IgM | Serum | Ocular toxoplasmosis / ophthalmology |  | Clinical Samples (lab-only diagnostic testing) |  |  | 6 | 2 | 7 | 145 | 46.15 | 98.64 |
| Ramos, 2024 [172] | Brazil | Diagnostic evaluation | Conventional / Gold Standard | Immunofluorescence | Serology (ELISA/ELFA/other) | IgG | Serum | Ocular toxoplasmosis / ophthalmology |  | Clinical samples (retrospective labeled clinical imaging dataset) + external validation (web images) |  |  | 98 | 1 | 7 | 54 | 93.33 | 98.18 |
| Ramos, 2024 [172] | Brazil | Diagnostic evaluation | Conventional / Gold Standard | PCR/qPCR | PCR/qPCR | Nucleic acid (DNA) | Blood (unspecified) | Ocular toxoplasmosis / ophthalmology |  | Clinical samples (stored sera; lab testing) |  |  | 30 | 12 | 11 | 107 | 73.17 | 89.92 |
| Ramos, 2024 [172] | Brazil | Diagnostic evaluation | Conventional / Gold Standard | PCR/qPCR | PCR/qPCR | Nucleic acid (DNA) | Blood (unspecified) | Ocular toxoplasmosis / ophthalmology |  | Clinical Samples (lab-based) |  |  | 30 | 11 | 12 | 107 | 71.43 | 90.68 |
| Ramos, 2024 [172] | Brazil | Diagnostic evaluation | Conventional / Gold Standard | PCR/qPCR | PCR/qPCR | Nucleic acid (DNA) | Blood (unspecified) | Ocular toxoplasmosis / ophthalmology |  | Clinical Samples (lab-based) |  |  |  |  |  |  |  |  |
| Ramos, 2024 [172] | Brazil | Diagnostic evaluation | Conventional / Gold Standard | PCR/qPCR | PCR/qPCR | Nucleic acid (DNA) | Other / unclear | Ocular toxoplasmosis / ophthalmology |  | Clinical Samples (lab-based) |  |  | 3 | 22 | 8 | 127 | 27.27 | 85.23 |
| Ramos, 2024 [172] | Brazil | Diagnostic evaluation | Conventional / Gold Standard | PCR/qPCR | PCR/qPCR | Nucleic acid (DNA) | Other / unclear | Ocular toxoplasmosis / ophthalmology |  | Clinical Samples (lab-based) |  |  | 5 | 6 | 19 | 130 | 20.83 | 95.59 |
| Ramos, 2024 [172] | Brazil | Diagnostic evaluation | Conventional / Gold Standard | PCR/qPCR | PCR/qPCR | Nucleic acid (DNA) | Other / unclear | Ocular toxoplasmosis / ophthalmology |  | Clinical Samples (lab-based) |  |  | 3 | 8 | 21 | 128 | 12.5 | 94.12 |
| Zhou, 2024 [173] | USA | Diagnostic evaluation | POCT | LFIA / rapid immunoassay | Serology (ELISA/ELFA/other) | IgG + IgM | Serum | Pregnancy/antenatal |  | Clinical Samples (lab-based) | IgG ~0.42; IgM ~0.71 (at 1:89 dilution) | IgG: IU/mL; IgM: ratio |  |  |  |  |  |  |
| Adebakin, 2025 [174] | Nigeria | Cross-sectional | Conventional / Gold Standard | Imaging | PCR/qPCR | Other / unclear | Other / unclear | Ocular toxoplasmosis / ophthalmology |  | Clinical Samples (lab-based) |  |  | 2 | 65 | 8 | 189 | 20 | 74.41 |
| Adebakin, 2025 [174] | Nigeria | Cross-sectional | Conventional / Gold Standard | ELISA/ELFA | PCR/qPCR | IgG | Serum | Ocular toxoplasmosis / ophthalmology |  | Clinical Samples (lab-based) |  |  | 9 | 89 | 1 | 165 | 90 | 64.96 |
| Marchese, 2025 [175] | Italy | Case series | Conventional / Gold Standard | PCR/qPCR | PCR/qPCR | Nucleic acid (DNA) | Ocular fluid | Ocular toxoplasmosis / ophthalmology |  | Clinical Samples (lab-based) |  |  |  |  |  |  |  |  |
| Naseem, 2025 [176] | Pakistan | Case-control | Conventional / Gold Standard | PCR/qPCR | Composite / clinical adjudication | IgG + IgM | Serum | General/mixed / other |  | Clinical Samples (lab-based) |  |  |  |  |  |  |  |  |
| Nourrisson, 2025 [177] | France | Retrospective | Conventional / Gold Standard | PCR/qPCR | PCR/qPCR | Nucleic acid (DNA) | Blood (unspecified) | Congenital/newborn/infant | ~20–30 min | Analytical (CLSI EP12-A2) + Clinical samples | <1 to 1–5 parasites/mL (center-dependent); also reported as <0.08 to 0.2–1 parasite/PCR (center-dependent) | parasites/mL (also parasites/PCR) | 71 | 0 | 4 | 66 | 94.67 | 100 |
| Umer, 2025 [178] | Paraguay | Retrospective | Machine Learning | Imaging | Other / unclear | Other / unclear | Other / unclear | Ocular toxoplasmosis / ophthalmology | ≤7 min (scan); images captured ~0.4 s | Clinical samples | N/S | N/S |  |  |  |  |  |  |
| Usluca, 2025 [179] | Turkey | Retrospective | Conventional / Gold Standard | PCR/qPCR | Other / unclear | Nucleic acid (DNA) | Tissue / biopsy | General/mixed / other |  | Clinical samples |  |  |  |  |  |  |  |  |
| Hoshina, 2026 [180] * | Japan | Cross-sectional | Conventional / Gold Standard | ELISA/ELFA | Not stated / none | IgG | Serum | HIV/AIDS |  | Clinical samples (ocular fluid PCR in real patients) |  |  |  |  |  |  |  |  |

**Table S3.** Risk of bias and applicability assessment results using QUADAS-2 for included diagnostic test evaluations. The table summarizes judgments across QUADAS-2 domains (patient selection, index test, reference standard, and flow/timing) and the corresponding applicability concerns, reporting the overall distribution of low, high, and unclear ratings.

| **First Author, Year** | **Patient Selection** | **Index Test** | **Reference Standard** | **Flow & Timing** | **Overall Risk** |
| --- | --- | --- | --- | --- | --- |
| Binnicker, 2010 [6] | Unclear | Unclear | Unclear | Low | Unclear |
| Canales, 2010 [7] | High | Unclear | Unclear | Unclear | High |
| Holec-Gąsior, 2010 [8] | High | Unclear | Unclear | High | High |
| Lau, 2010 [9] | High | Unclear | Unclear | Low | High |
| Machado, 2010 [10] | Unclear | Unclear | Unclear | High | High |
| Prusa, 2010 [11] | Unclear | Unclear | Unclear | Low | Unclear |
| Saraei, 2010 [12] | Unclear | Unclear | Unclear | Unclear | Unclear |
| Liang, 2011 [13] | High | High | Unclear | Unclear | High |
| Okusaga, 2011 [14] | Unclear | Unclear | Unclear | Unclear | Unclear |
| Sugita, 2011 [15] | High | Unclear | High | Unclear | High |
| Busemann, 2012 [16] | Unclear | Unclear | Unclear | High | High |
| Chiang, 2012 [17] | High | Unclear | High | Unclear | High |
| Jalallou, 2012 [18] | High | High | Unclear | Unclear | High |
| Khammari, 2012 [19] | High | High | Unclear | Unclear | High |
| Selseleh, 2012 [20] | High | Unclear | Unclear | Unclear | High |
| Silva-dos-Santos, 2012 [21] | High | High | Unclear | Unclear | High |
| Villard, 2012 [22] | High | Low | Unclear | Unclear | High |
| Asai, 2013 [23] | High | Unclear | Unclear | Unclear | High |
| Bhattacharyya, 2013 [24] | High | Unclear | Unclear | Low | High |
| Chemoh, 2013 [25] | Unclear | Unclear | Unclear | Unclear | Unclear |
| Dai, 2013 [26] | High | Unclear | Unclear | Unclear | High |
| Deshpande, 2013 [27] | High | Unclear | Unclear | Unclear | High |
| Khammari, 2013 [28] | Unclear | Unclear | Unclear | High | High |
| Mikita, 2013 [29] | High | Unclear | Unclear | High | High |
| Murat, 2013 [30] | Unclear | Unclear | Unclear | Unclear | Unclear |
| Prusa, 2013 [31] | Unclear | Unclear | Unclear | High | High |
| Song, 2013 [32] | High | Unclear | Unclear | Unclear | High |
| Villard, 2013 [33] | High | Unclear | Unclear | Unclear | High |
| Caballero-Ortega, 2014 [34] | Low | Unclear | Unclear | High | High |
| Khammari, 2014 [35] | High | High | Unclear | Unclear | High |
| Ogouyèmi-Hounto, 2014 [36] | Unclear | Unclear | Unclear | Unclear | Unclear |
| Varlet-Marie, 2014 [37] | Unclear | Unclear | Unclear | Unclear | Unclear |
| Blay, 2015 [38] | High | Unclear | Unclear | Low | High |
| Capobiango, 2015 [39] | High | Unclear | Unclear | Unclear | High |
| Filisetti et al., 2015 [40] | High | Unclear | Unclear | High | High |
| Hallur, 2015 [41] | Unclear | Unclear | Unclear | Unclear | Unclear |
| Li, 2015 [42] | High | Unclear | Unclear | Unclear | High |
| Previato, 2015 [43] | High | Unclear | Unclear | High | High |
| Prusa, 2015 [44] | Unclear | Low | Unclear | High | High |
| Robert-Gangneux, 2015 [45] | Unclear | Unclear | High | High | High |
| Rodrigues, 2015 [46] | High | High | Unclear | High | High |
| Arab-Mazar, 2016 [47] | High | High | Unclear | Unclear | High |
| Avci, 2016 [48] | Unclear | Unclear | Unclear | Unclear | Unclear |
| Costa, 2016 [49] | High | High | Unclear | Unclear | High |
| de Oliveira, 2016 [50] | Unclear | Unclear | High | Unclear | High |
| El-Bali, 2016 [51] | Unclear | Unclear | Unclear | High | High |
| Fan, 2016 [52] | High | Unclear | Unclear | Unclear | High |
| Mohammadpour, 2016 [53] | High | Unclear | Unclear | Unclear | High |
| Poltavchenko, 2016 [54] | High | Unclear | Unclear | High | High |
| Sroka, 2016 [55] | High | Unclear | High | Unclear | High |
| Stajner, 2016 [56] | Unclear | Unclear | Unclear | High | High |
| Armengol, 2017 [57] | Unclear | Unclear | High | High | High |
| Barros, 2017 [58] | Unclear | High | Unclear | Low | High |
| Begeman, 2017 [59] | High | Low | Unclear | High | High |
| Berredjem, 2017 [60] | Unclear | Unclear | Unclear | High | High |
| Chapey, 2017 [61] | High | Low | Unclear | Unclear | High |
| Laboudi, 2017 [62] | Unclear | Unclear | High | Low | High |
| Matin, 2017 [63] | Unclear | Unclear | Unclear | Low | Unclear |
| Mazzu-Nascimento, 2017 [64] | Unclear | High | Unclear | High | High |
| Murata, 2017 [65] | High | Unclear | High | High | High |
| Naghili, 2017 [66] | Unclear | Unclear | Unclear | High | High |
| Peretti, 2017 [67] | High | High | Unclear | Unclear | High |
| Robert-Gangneux, 2017 [68] | High | Unclear | Unclear | Unclear | High |
| Sun, 2017 [69] | Unclear | Unclear | Unclear | Low | Unclear |
| Zacche-Tonini, 2017 [70] | High | Unclear | Unclear | High | High |
| Zhang, 2017 [71] | Unclear | Unclear | Unclear | Low | Unclear |
| Abd El Aal, 2018 [72] | Unclear | Unclear | Unclear | Low | Unclear |
| Aly, 2018 [73] | High | Unclear | High | Unclear | High |
| Barakat, 2018 [74] | High | Unclear | Unclear | Low | High |
| Bispo, 2018 [75] | High | Unclear | Unclear | High | High |
| Boudaouara, 2018 [76] | Unclear | Unclear | Unclear | High | High |
| Carral, 2018 [77] | Unclear | Unclear | Unclear | Unclear | Unclear |
| Çınar Tanrıverdi, 2018 [78] | Unclear | Unclear | High | Unclear | High |
| Masini, 2018 [79] | Unclear | Unclear | Unclear | High | High |
| Roiko, 2018 [80] | High | High | Unclear | High | High |
| Sardarian, 2018 [81] | Unclear | Unclear | High | High | High |
| Varlet-Marie, 2018 [82] | High | Unclear | Unclear | Unclear | High |
| Boquel, 2019 [83] | High | High | Unclear | High | High |
| Botein, 2019 [84] | High | Unclear | Unclear | Low | High |
| Döşkaya, 2019 [85] | Unclear | Unclear | Unclear | Unclear | Unclear |
| Douet, 2019 [86] | High | High | Unclear | Unclear | High |
| Hanifehpour, 2019 [87] | High | Unclear | Unclear | Unclear | High |
| Lévêque, 2019 [88] | High | Unclear | Unclear | High | High |
| Martins, 2019 [89] | Unclear | Unclear | Unclear | Unclear | Unclear |
| Medawar-Aguilar, 2019 [90] | High | Unclear | Unclear | Unclear | High |
| Moghaddas, 2019 [91] | High | Unclear | Unclear | Unclear | High |
| Morovati et al., 2019 [92] | High | Unclear | Unclear | Unclear | High |
| Olariu, 2019 [93] | High | Unclear | Unclear | High | High |
| Rahimi Esboei, 2019 [94] | Unclear | Unclear | Unclear | Unclear | Unclear |
| Takara, 2019 [95] | High | Unclear | Unclear | Unclear | High |
| Thangarajah, 2019 [96] | High | Unclear | High | High | High |
| Vargas-Montes, 2019 [97] | High | Unclear | Unclear | High | High |
| Wassef, 2019 [98] | Unclear | Unclear | Unclear | Low | Unclear |
| Ahmedani, 2020 [99] | High | Unclear | High | Unclear | High |
| Ait Ammar, 2020 [100] | High | Unclear | Unclear | High | High |
| Brandão-de-Resende, 2020 [101] | High | High | Unclear | Unclear | High |
| Chiquet, 2020 [102] | High | Unclear | Unclear | High | High |
| de Oliveira Dias, 2020 [103] | High | Unclear | Unclear | High | High |
| Echeverri, 2020 [104] | Unclear | Unclear | Unclear | High | High |
| Ferra, 2020 [105] | High | High | Unclear | High | High |
| Hegazy, 2020 [106] | Unclear | Unclear | Unclear | Unclear | Unclear |
| Leroy, 2020 [107] | High | Unclear | Unclear | Unclear | High |
| Morovati Khamsi, 2020 [108] | High | Unclear | Unclear | High | High |
| Ozcelik, 2020 [109] | High | Unclear | Unclear | Low | High |
| Pomares, 2020 [110] | Unclear | Unclear | High | Unclear | High |
| Simon, 2020 [111] | Unclear | Unclear | High | High | High |
| Soltani Tehrani, 2020 [112] | Unclear | Unclear | High | Unclear | High |
| Wang, 2020 [113] | High | Unclear | Unclear | High | High |
| Ybañez, 2020 [114] | Unclear | Unclear | Unclear | Low | Unclear |
| Ben-Abdallah, 2021 [115] | High | Unclear | Unclear | High | High |
| Brenier-Pinchart, 2021 [116] | High | Unclear | Unclear | High | High |
| El Mansouri, 2021 [117] | High | Unclear | Low | Low | High |
| El-Sayad, 2021 [118] | Unclear | Unclear | Unclear | Low | Unclear |
| Hashemi, 2021 [119] | Unclear | Unclear | Unclear | Unclear | Unclear |
| Khalili Pour, 2021 [120] | High | Unclear | Unclear | Unclear | High |
| Kheirandish, 2021 [121] | Unclear | Unclear | High | Low | High |
| Lijeskić, 2021 [122] | High | Unclear | Unclear | High | High |
| Logroño Wiese, 2021 [123] | Low | Unclear | High | High | High |
| Mirahmadi, 2021 [124] | High | Unclear | High | Unclear | High |
| Nourrisson, 2021 [125] | High | Unclear | Unclear | High | High |
| Parra, 2021 [126] | High | Unclear | Unclear | Low | High |
| Safarpour, 2021 [127] | High | Unclear | Unclear | Unclear | High |
| Sousa, 2021 [128] | High | Unclear | Unclear | Unclear | High |
| Souza, 2021 [129] | Unclear | Unclear | Unclear | High | High |
| Steinberg, 2021 [130] | Unclear | Unclear | Unclear | High | High |
| SUN Working Group, 2021 [131] | High | Unclear | Unclear | High | High |
| Trotta, 2021 [132] | Low | Unclear | Unclear | Low | Unclear |
| Wu, 2021 [133] | High | Unclear | High | Unclear | High |
| Zhao, 2021 [134] | Unclear | Unclear | Unclear | Low | Unclear |
| Aerts, 2022 [135] | High | Unclear | High | High | High |
| Azimi, 2022 [136] | Unclear | Unclear | Unclear | Unclear | Unclear |
| Brenier-Pinchart, 2022 [137] | High | Unclear | Unclear | High | High |
| Jean-Pierre, 2022 [138] | High | Unclear | Unclear | High | High |
| Kim, 2022 [139] | High | Unclear | Unclear | Unclear | High |
| Ksiaa, 2022 [140] | High | Low | Unclear | High | High |
| Lévêque, 2022 [141] | High | Unclear | Unclear | High | High |
| Meroni, 2022 [142] | High | Low | Unclear | High | High |
| Mirahmadi, 2022 [143] | High | Unclear | High | Low | High |
| Rodrigues, 2022 [144] | Unclear | High | Unclear | Unclear | High |
| Stajner, 2022 [145] | Unclear | Unclear | High | Unclear | High |
| Yéngué, 2022 [146] | Unclear | Unclear | Unclear | Unclear | Unclear |
| Zhao, 2022 [147] | Unclear | Unclear | Unclear | Unclear | Unclear |
| Abraham, 2023 [148] | High | Low | High | High | High |
| Aly, 2023 [149] | High | Unclear | Unclear | Unclear | High |
| Canedo-Solares, 2023 [150] | High | Unclear | Unclear | Unclear | High |
| Cardozo, 2023 [151] | High | Unclear | Unclear | Unclear | High |
| Dambrun, 2023 [152] | Unclear | Unclear | Unclear | High | High |
| Dragomir, 2023 [153] | High | Unclear | Unclear | Unclear | High |
| Hosseini, 2023 [154] | Unclear | Unclear | Unclear | High | High |
| Londoño-Martinez, 2023 [155] | High | Unclear | Unclear | High | High |
| Nabet, 2023 [156] | Unclear | Unclear | Unclear | Unclear | Unclear |
| Sofia, 2023 [157] | Unclear | Unclear | Unclear | Unclear | Unclear |
| Abedian, 2024 [158] | Unclear | Unclear | Unclear | Unclear | Unclear |
| Aktas, 2024 [159] | High | Unclear | High | Low | High |
| Cifuentes-Gonzalez, 2024 [160] | High | Unclear | Unclear | High | High |
| Datta, 2024 [161] | Unclear | Unclear | Unclear | High | High |
| Deleplancque, 2024 [162] | Unclear | Unclear | Unclear | Unclear | Unclear |
| Eraghi, 2024 [163] | Unclear | Unclear | Unclear | High | High |
| Guitard, 2024 [164] | High | Unclear | Unclear | Unclear | High |
| Gulshan, 2024 [165] | High | Unclear | High | Unclear | High |
| Hurt, 2024 [166] | Low | Unclear | Unclear | Low | Unclear |
| Kamel, 2024 [167] | Unclear | Unclear | Unclear | Unclear | Unclear |
| Li, 2024 [168] | High | Unclear | Unclear | Unclear | High |
| Mikita et al. , 2024 [169] | Unclear | Unclear | High | High | High |
| Milad, 2024 [170] | High | Unclear | Unclear | Unclear | High |
| Ota, 2024 [171] | Unclear | Unclear | Unclear | Unclear | Unclear |
| Ramos, 2024 [172] | High | Unclear | High | Unclear | High |
| Zhou, 2024 [173] | High | Low | Unclear | High | High |
| Adebakin, 2025 [174] | Unclear | Unclear | Unclear | High | High |
| Marchese, 2025 [175] | Unclear | Unclear | Unclear | Unclear | Unclear |
| Naseem, 2025 [176] | High | Unclear | Unclear | Unclear | High |
| Nourrisson, 2025 [177] | High | Unclear | Unclear | High | High |
| Umer, 2025 [178] | High | Unclear | Unclear | Unclear | High |
| Usluca, 2025 [179] | High | Unclear | High | Unclear | High |
| Hoshina, 2025 [180] | High | Unclear | Unclear | High | High |


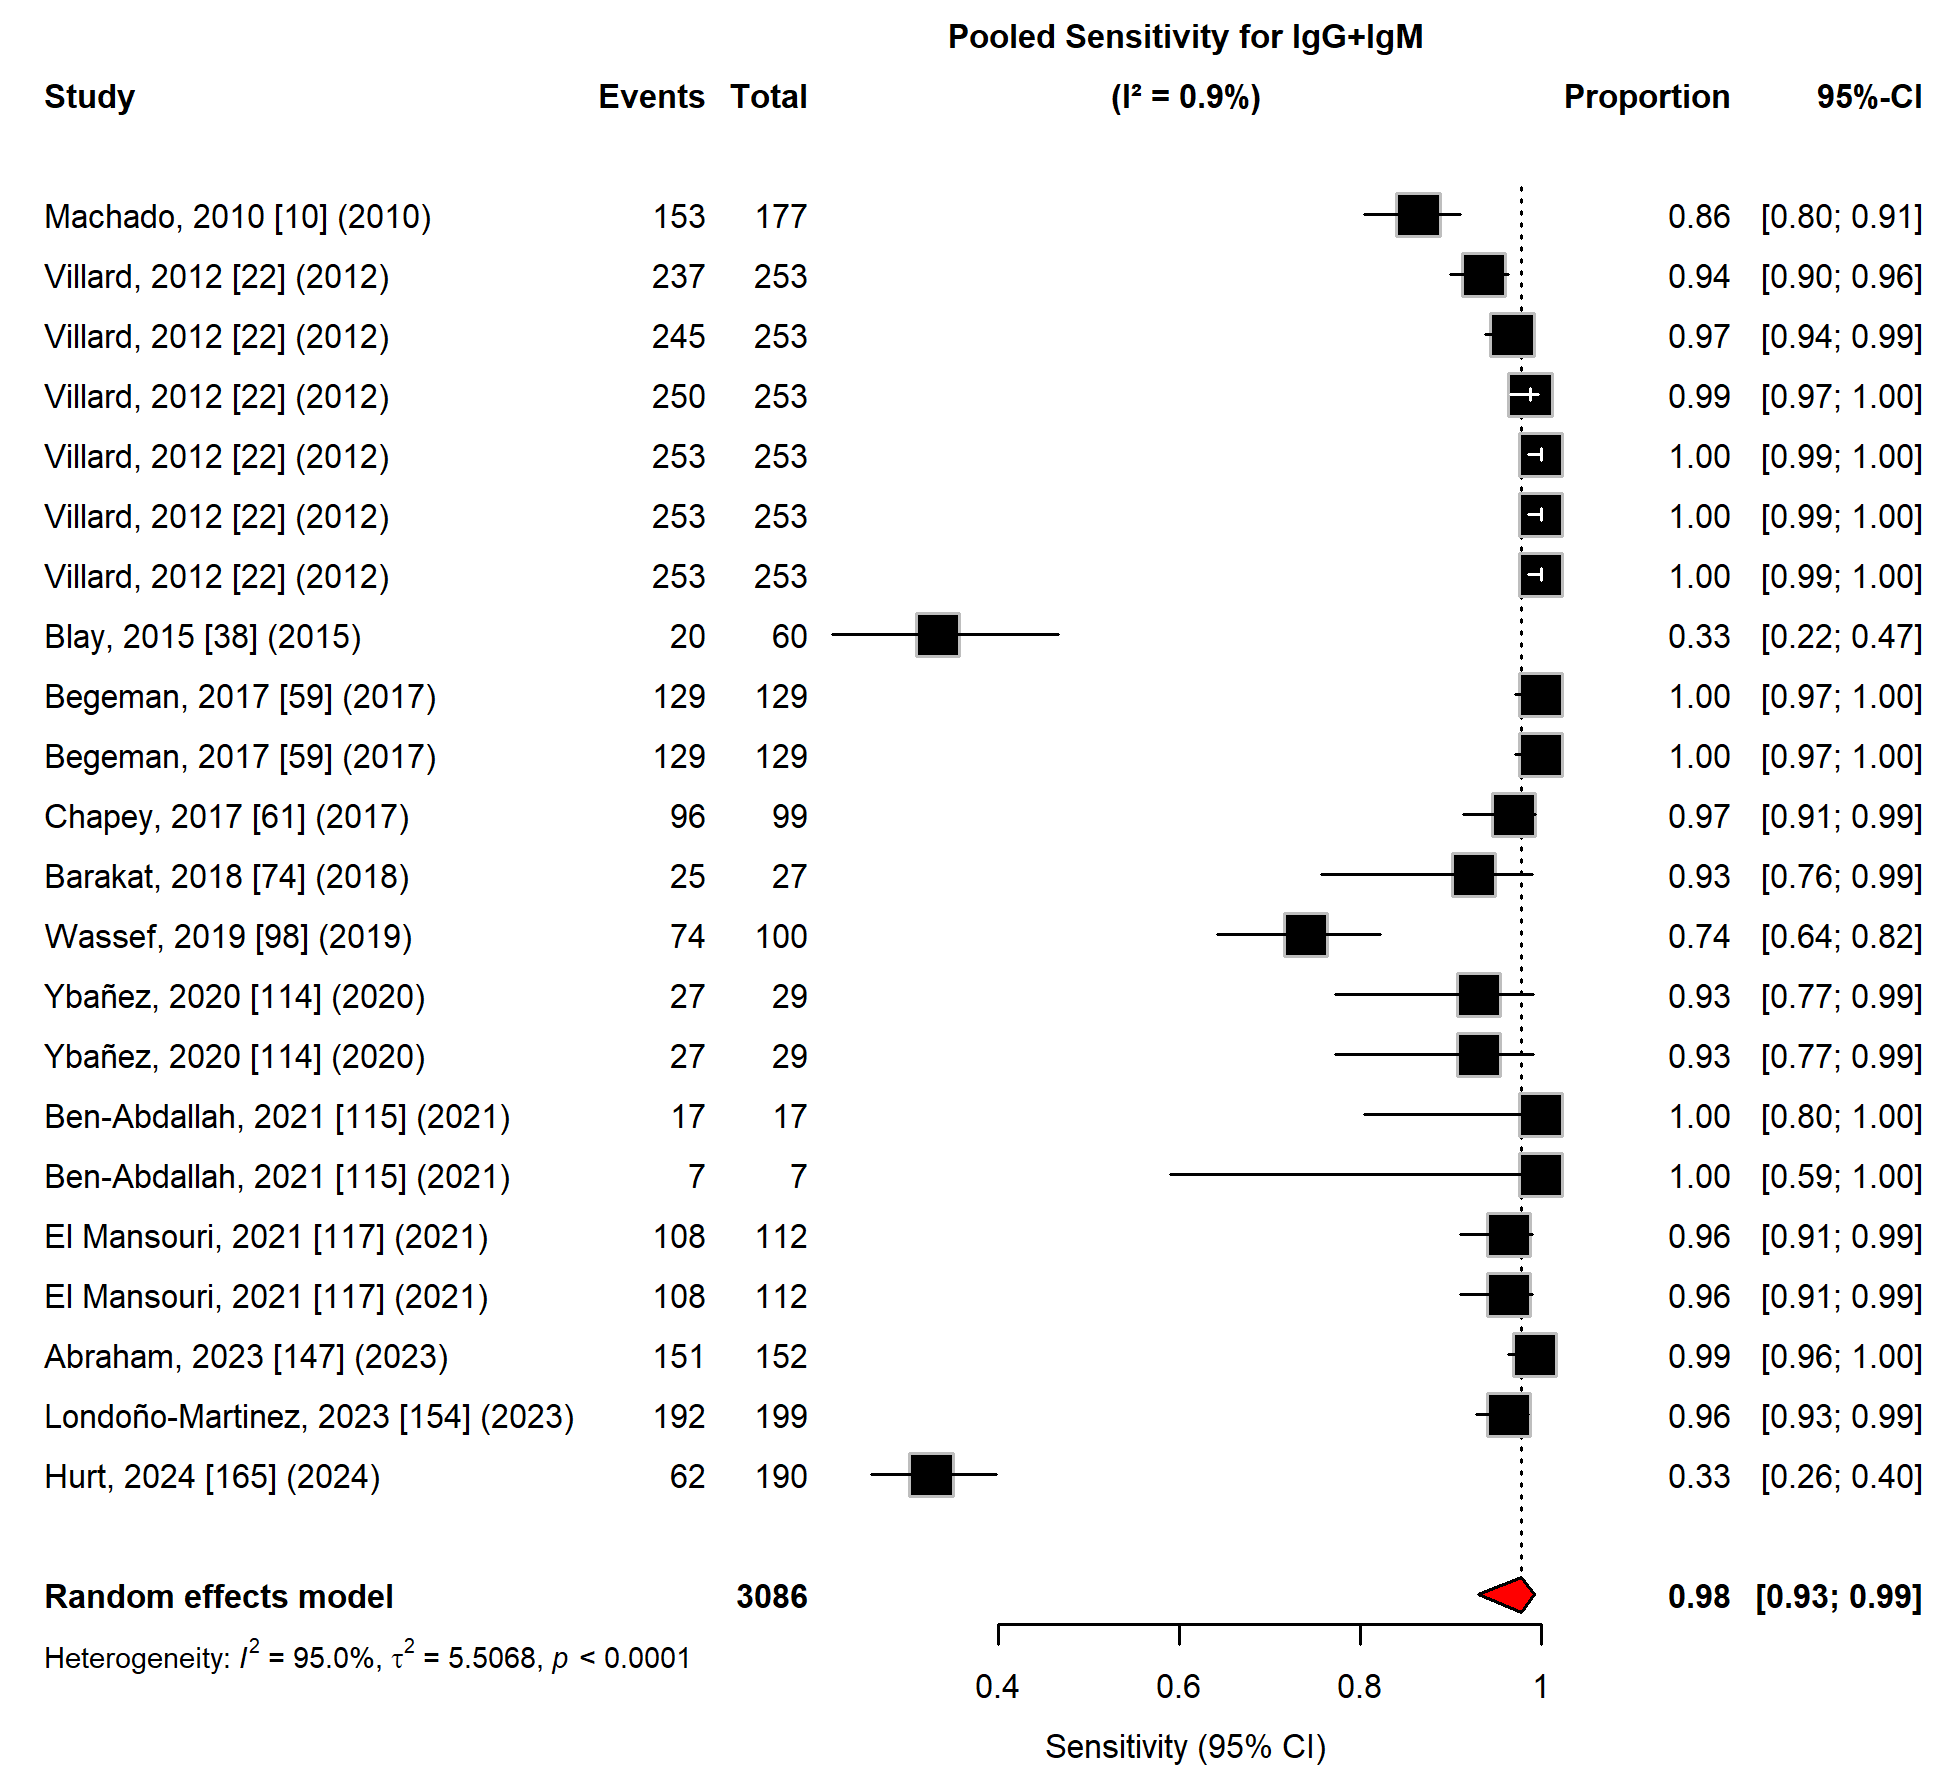


**Figure S1**. Forest plot of sensitivity for the IgG+IgM (combined) detection target subgroup (k = 22). Individual study sensitivity estimates with 95% confidence intervals are shown, illustrating between-study variability in sensitivity across combined IgG+IgM evaluations.


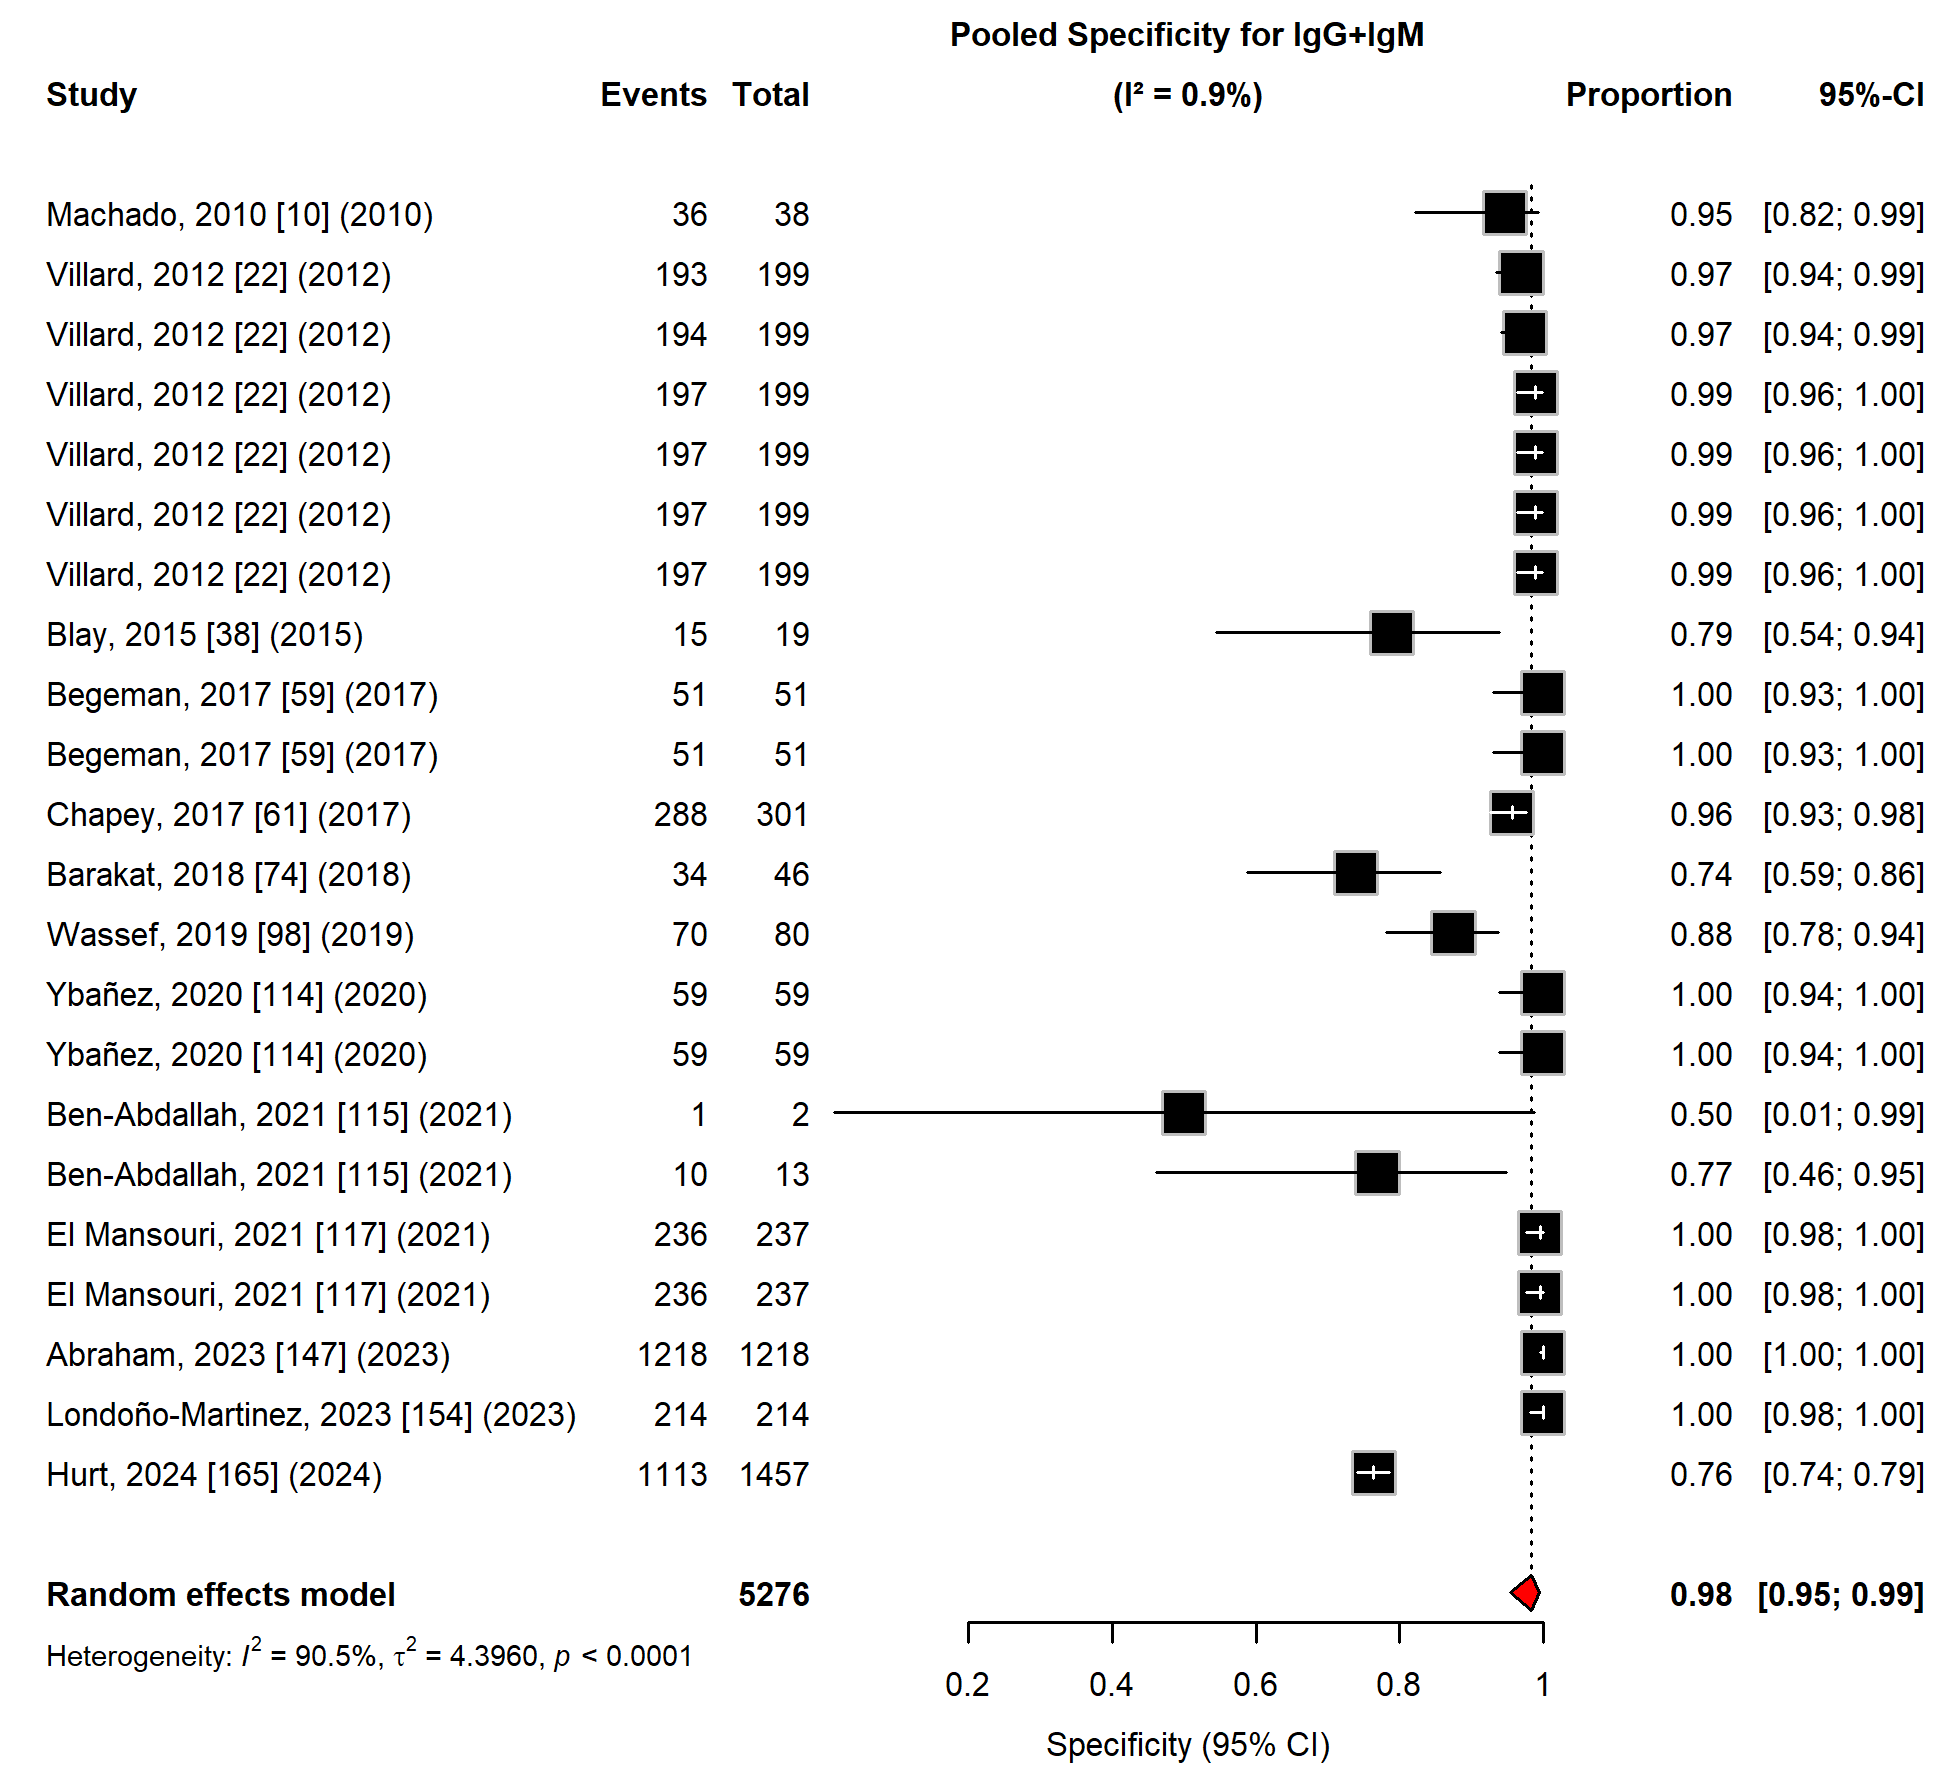


**Figure S2**. Forest plot of specificity for the IgG+IgM (combined) detection target subgroup (k = 22). Individual study specificity estimates with 95% confidence intervals are shown, illustrating between-study variability in specificity across combined IgG+IgM evaluations.


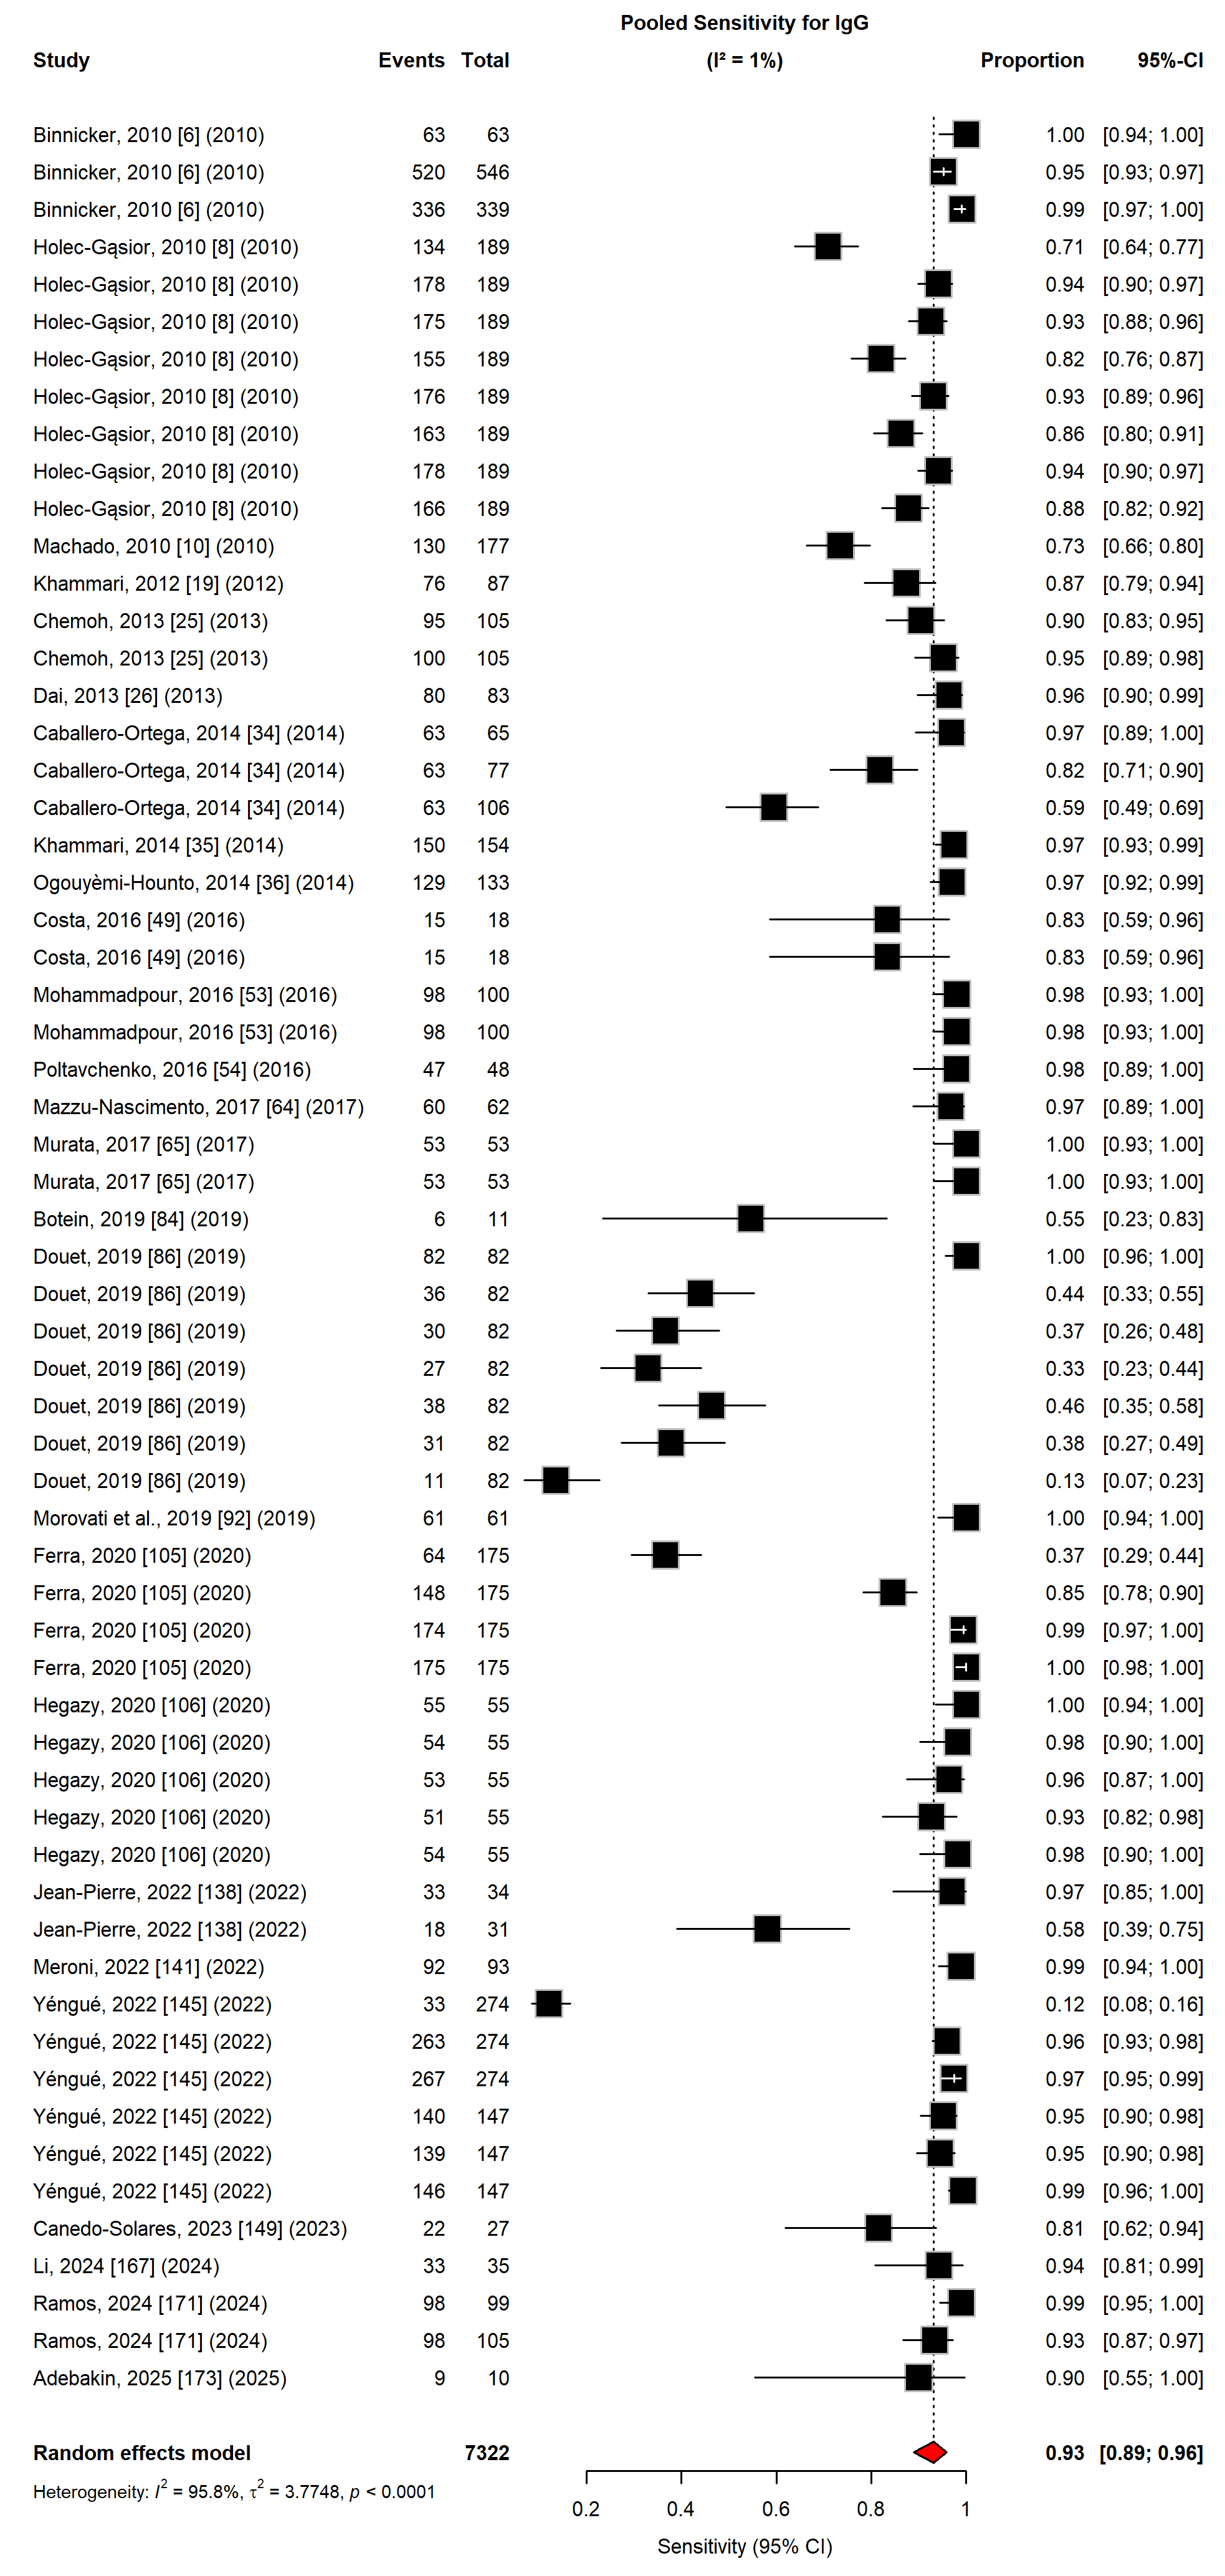


**Figure S3**. Forest plot of sensitivity for the IgG detection target subgroup (k = 61). Individual study sensitivity estimates with 95% confidence intervals are displayed, illustrating between-study heterogeneity in sensitivity across IgG evaluations.


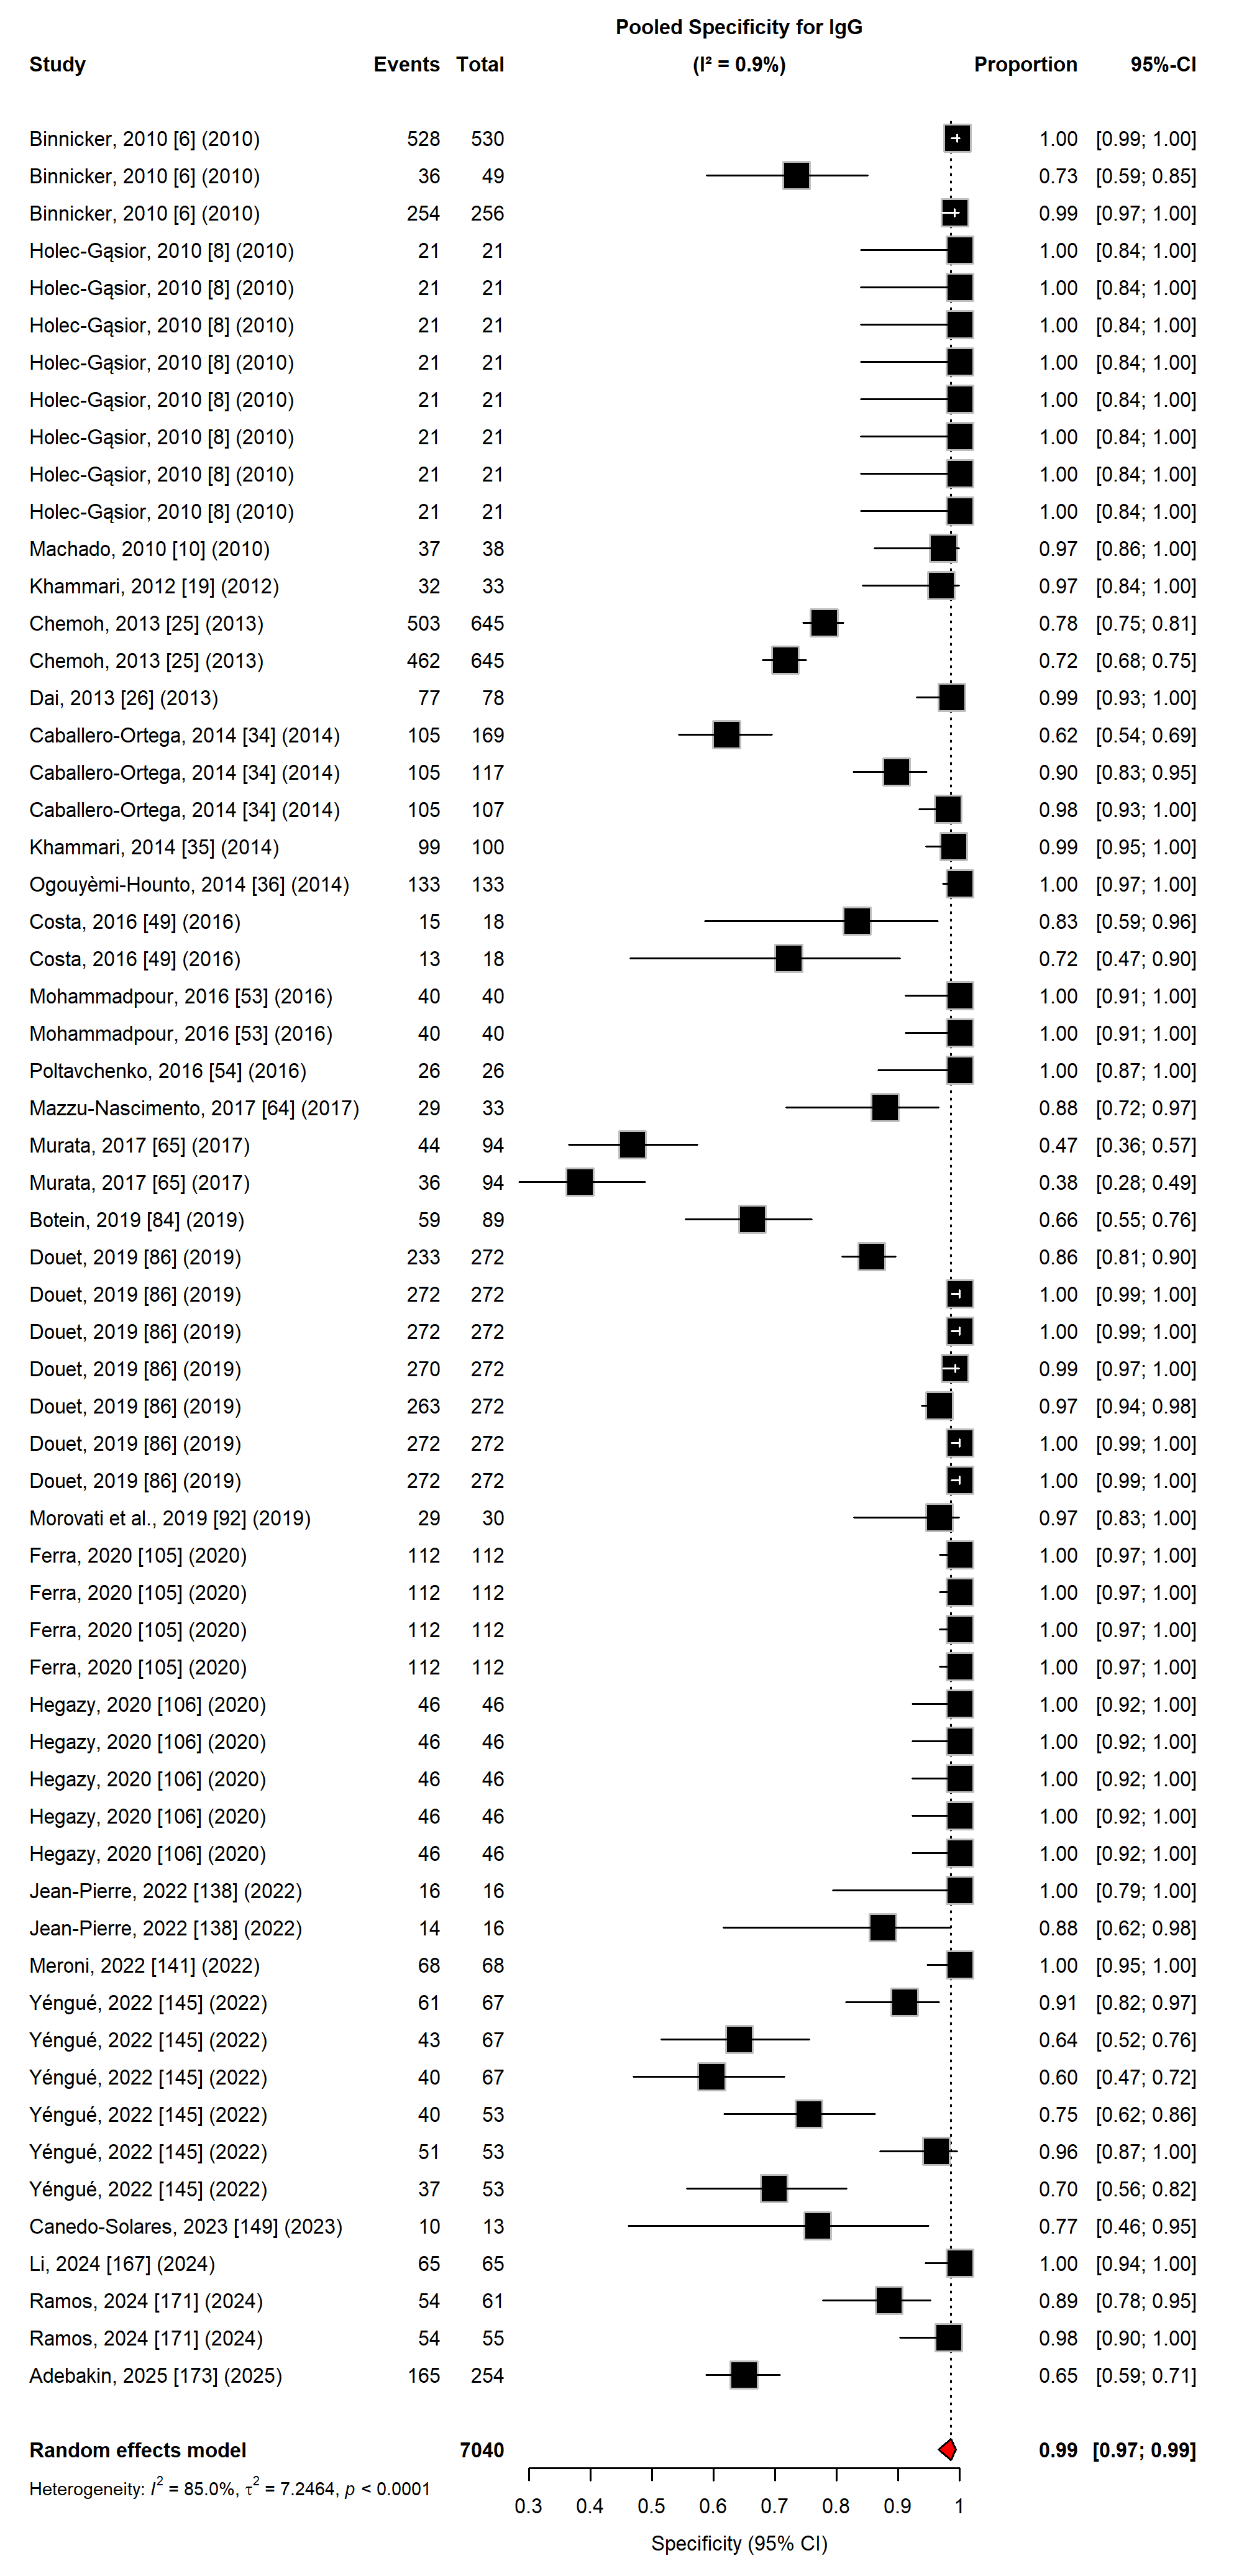


**Figure S4**. Forest plot of specificity for the IgG detection target subgroup (k = 61). Individual study specificity estimates with 95% confidence intervals are displayed, illustrating between-study heterogeneity in specificity across IgG evaluations.


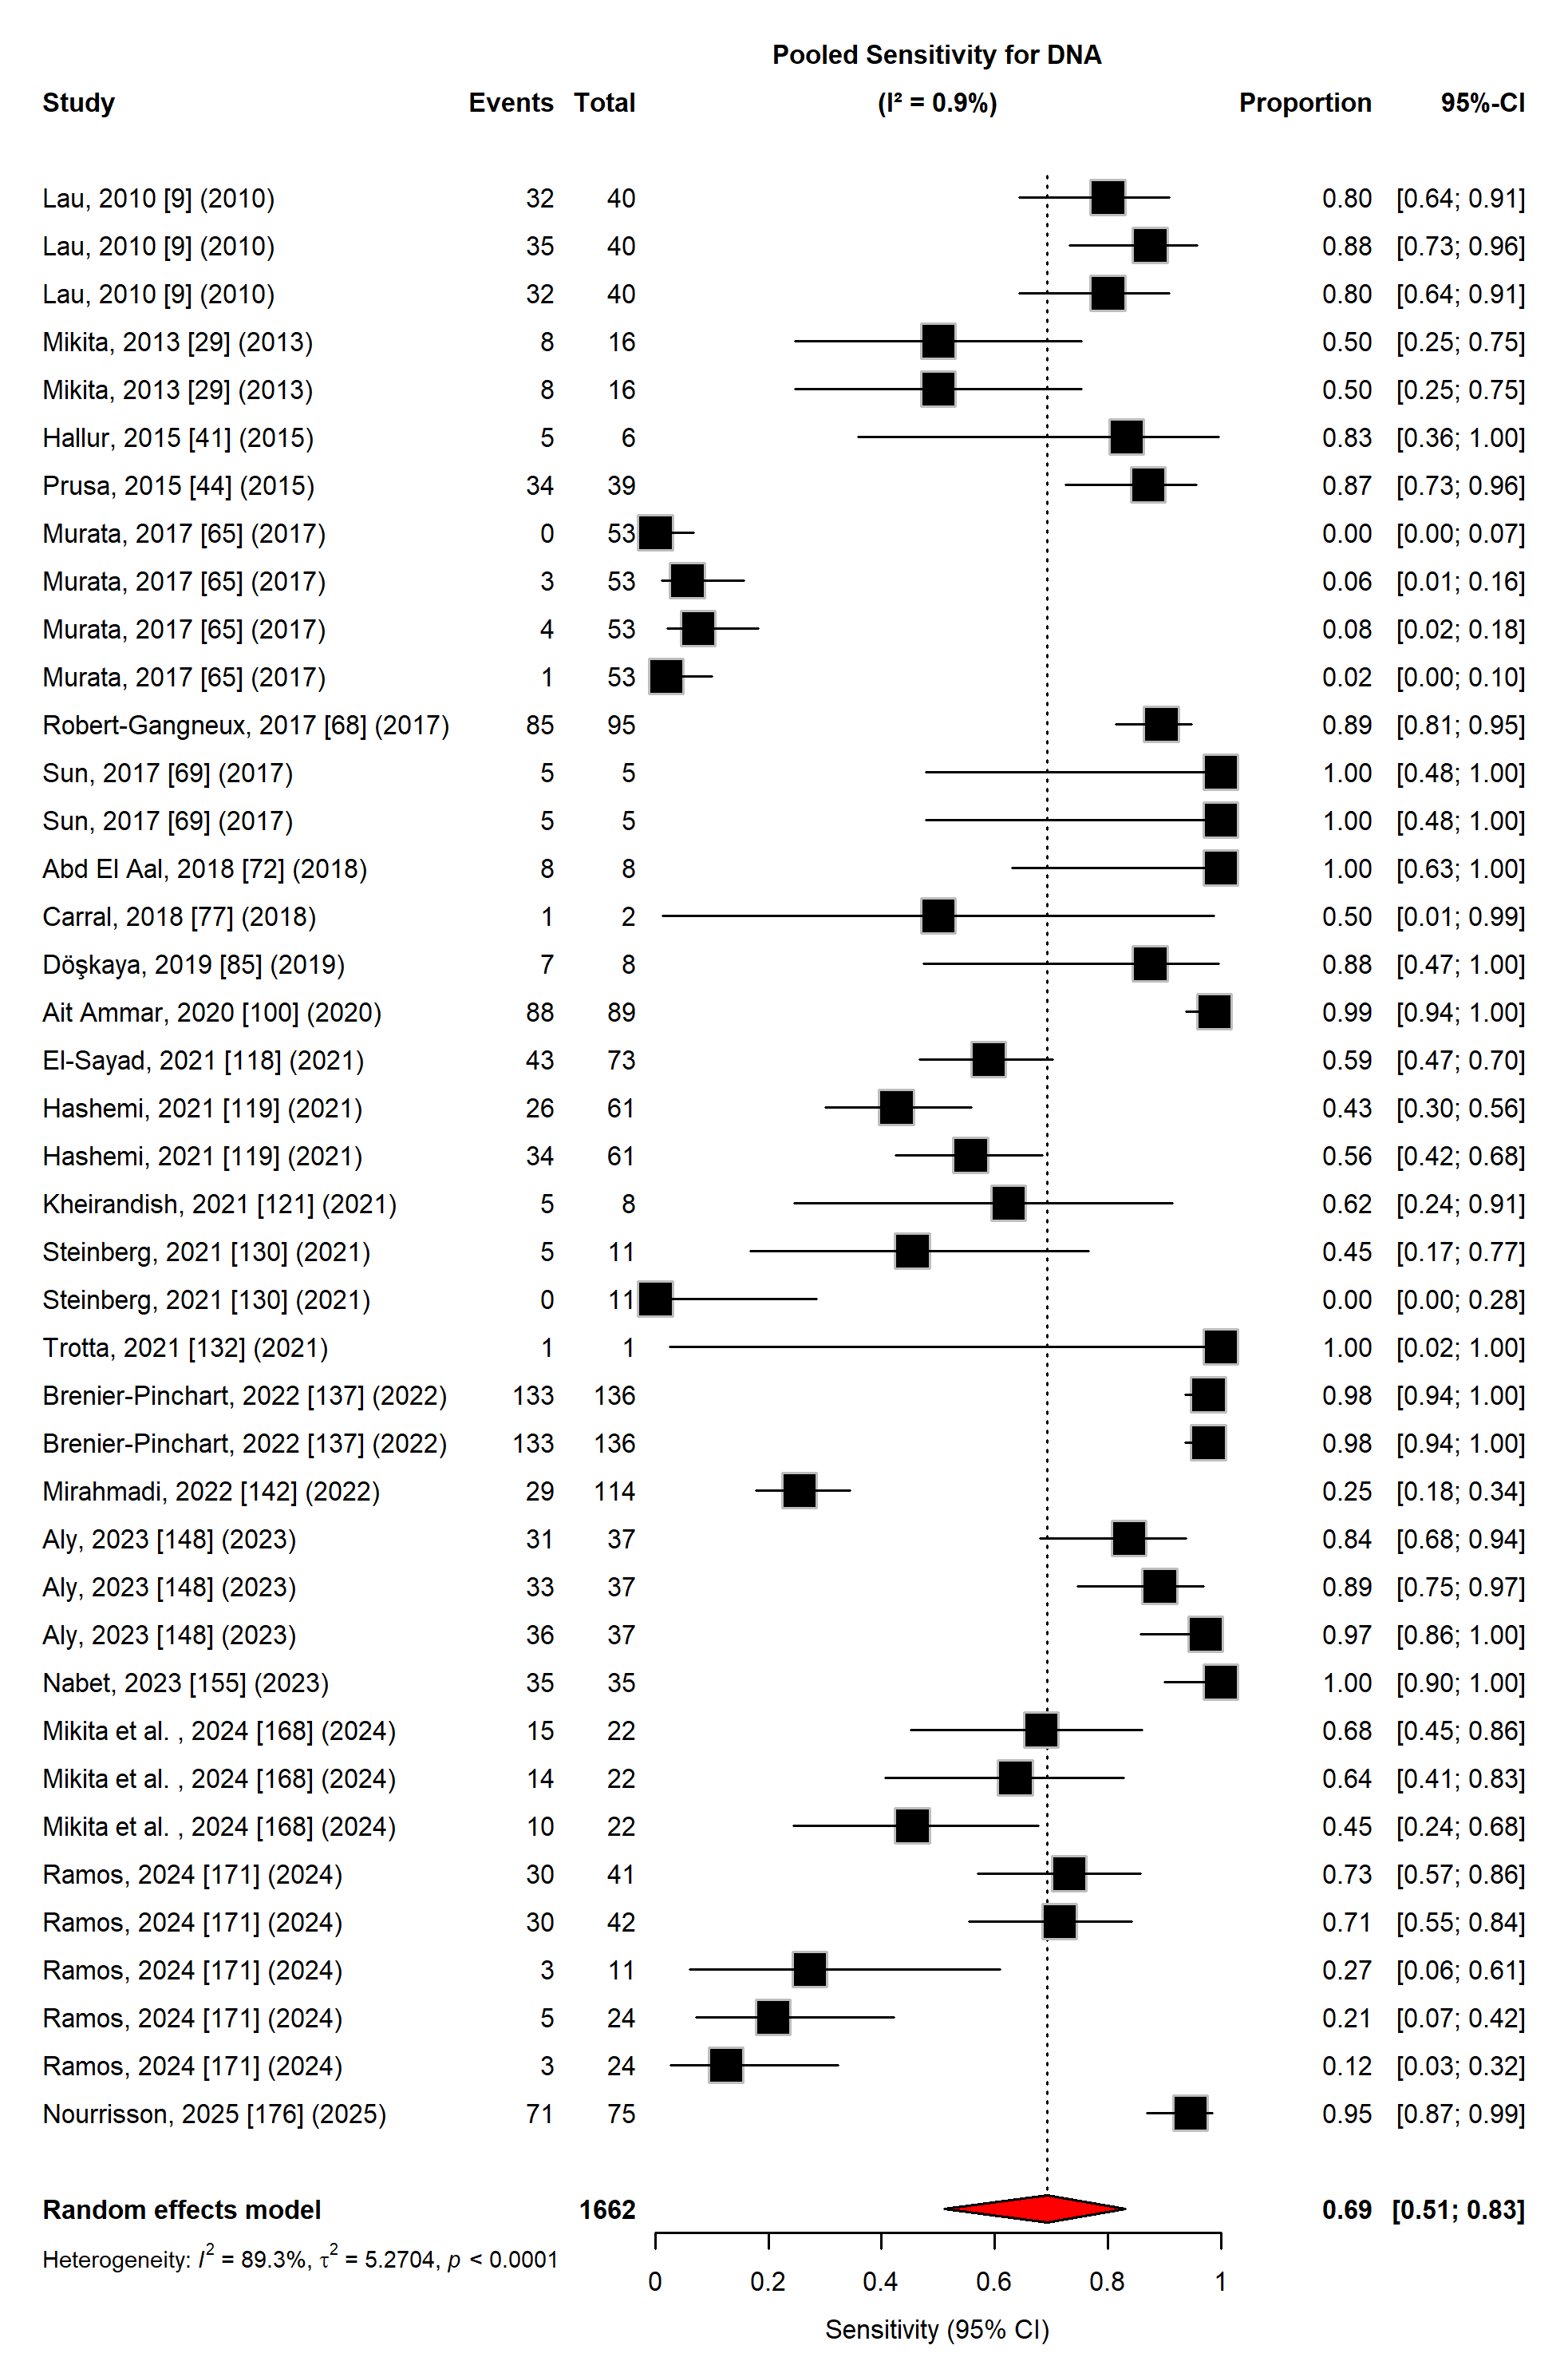


**Figure S5**. Forest plot of sensitivity for the DNA detection target subgroup (k = 41). Individual study sensitivity estimates with 95% confidence intervals are shown, highlighting between-study heterogeneity in sensitivity across DNA-based evaluations.


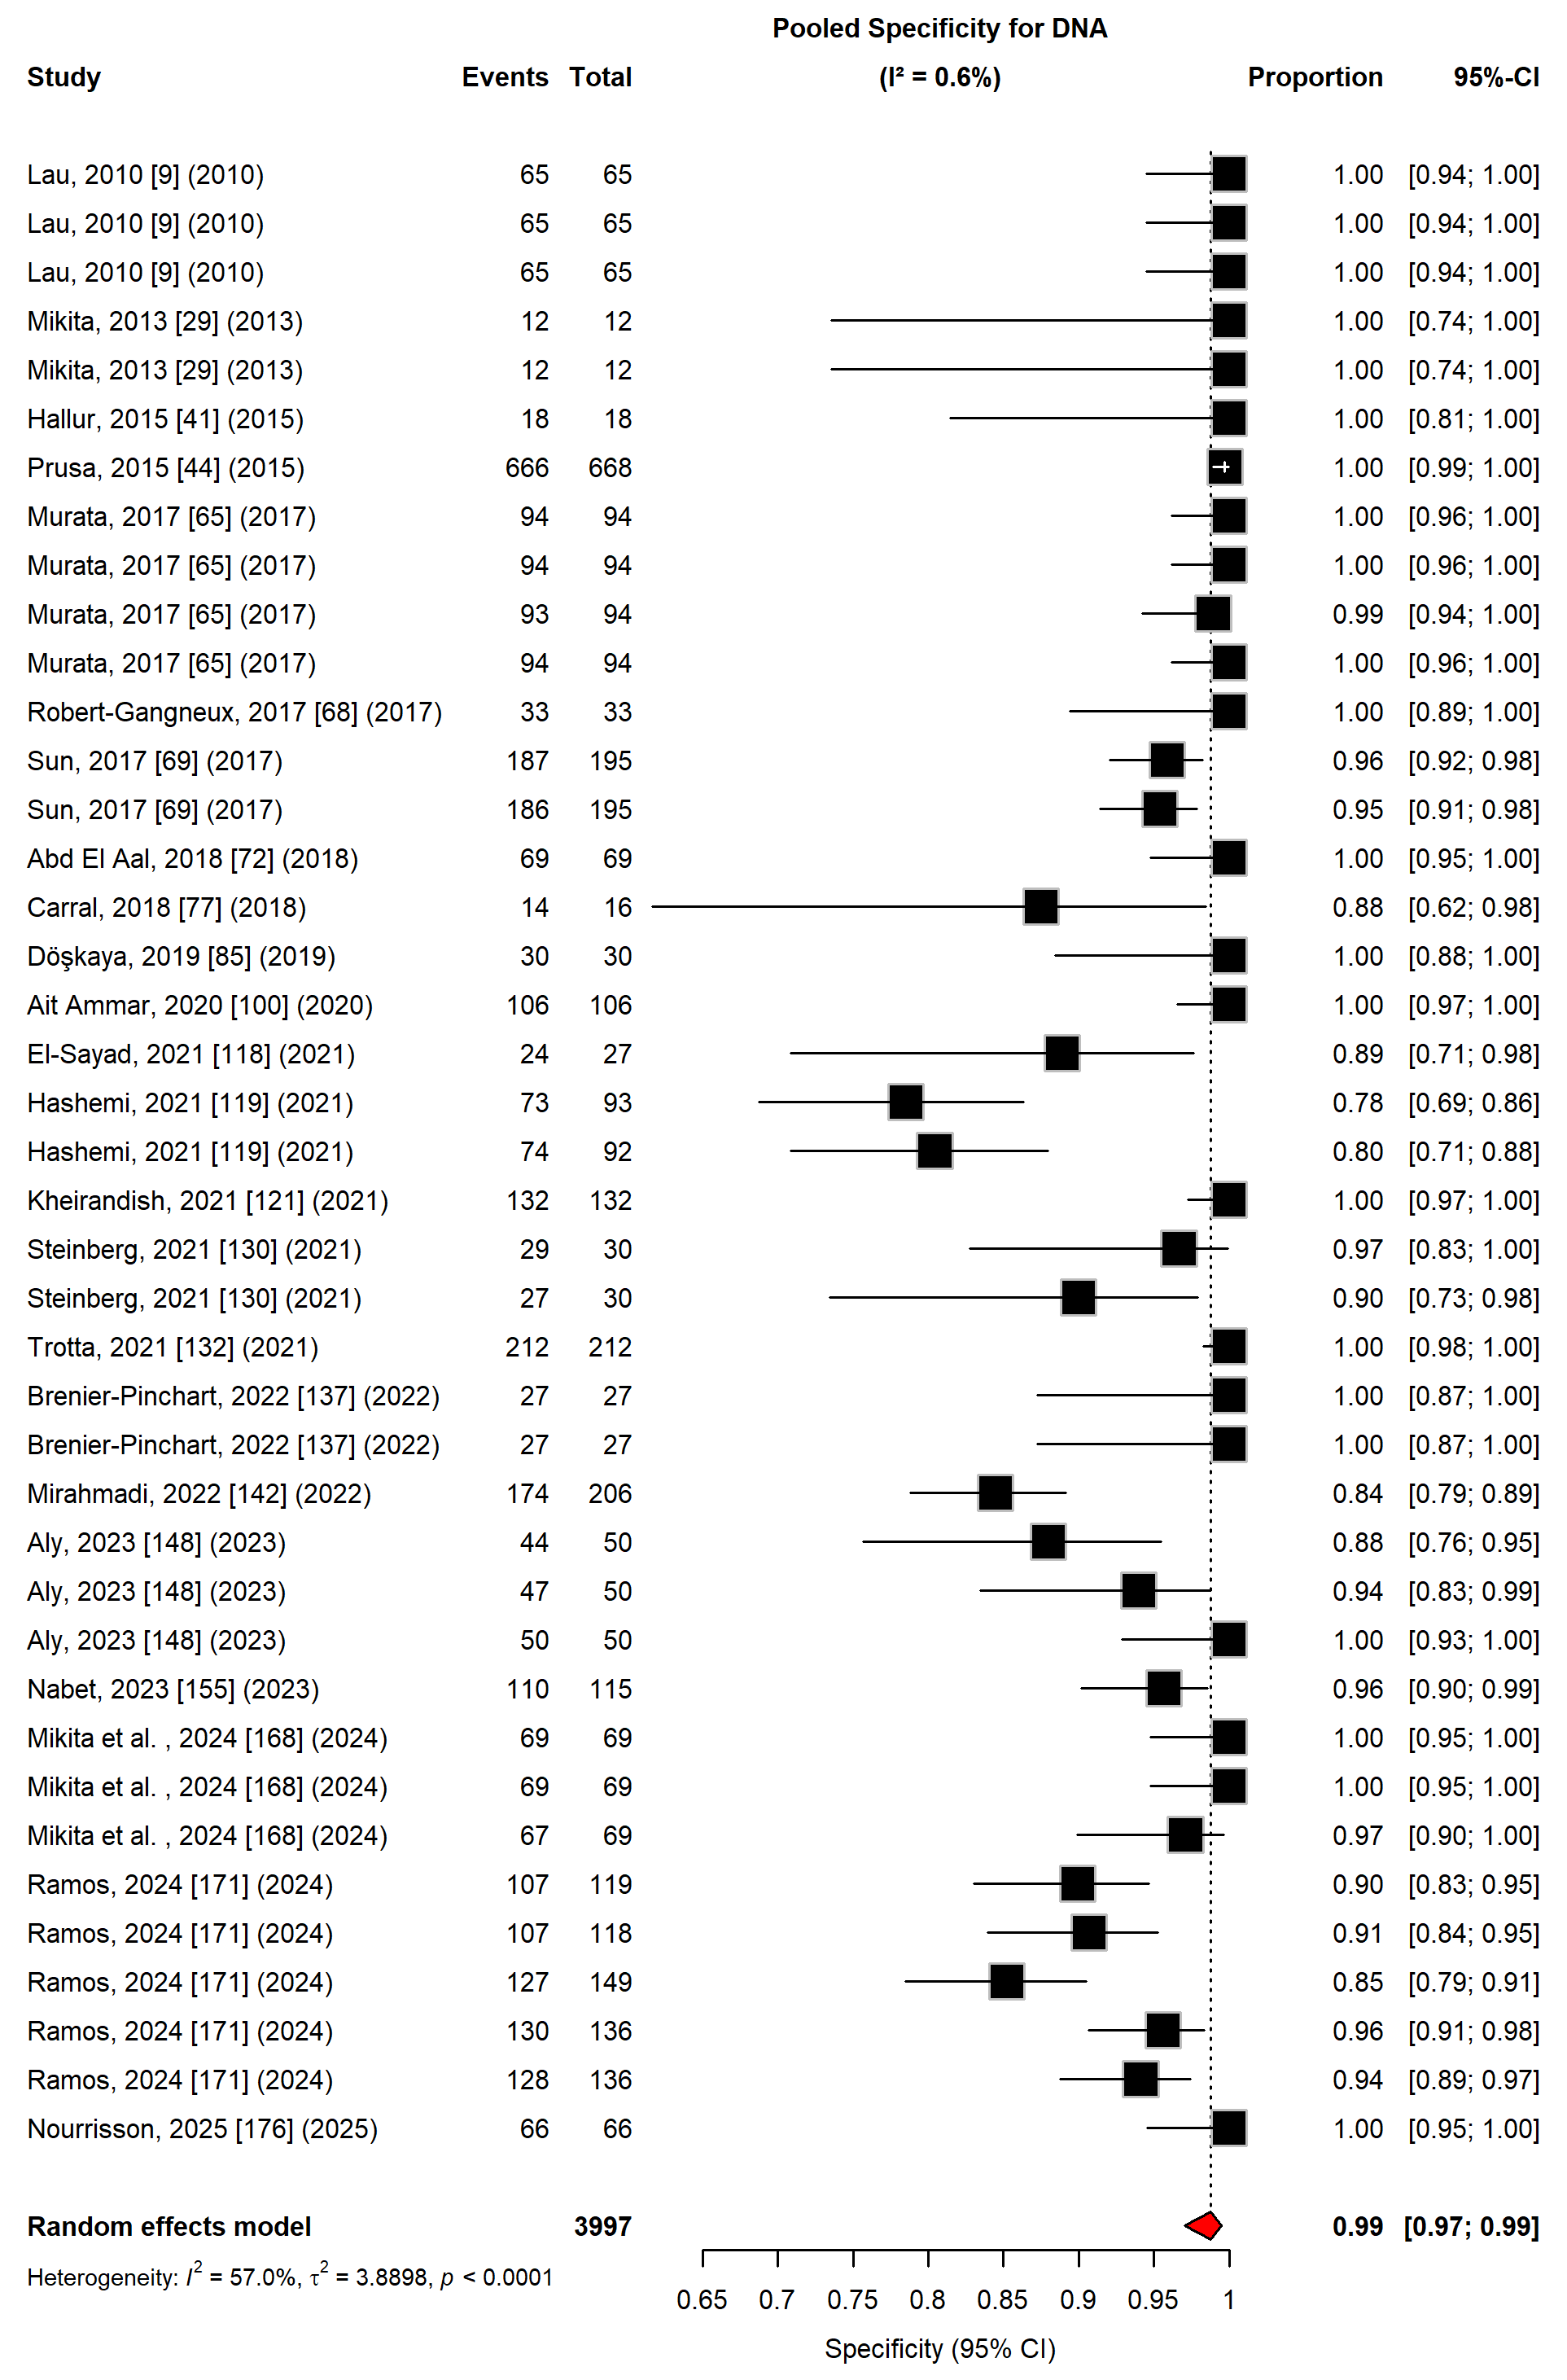


**Figure S6**. Forest plot of specificity for the DNA detection target subgroup (k = 41). Individual study specificity estimates with 95% confidence intervals are shown, illustrating between-study variability in specificity across DNA-based evaluations.


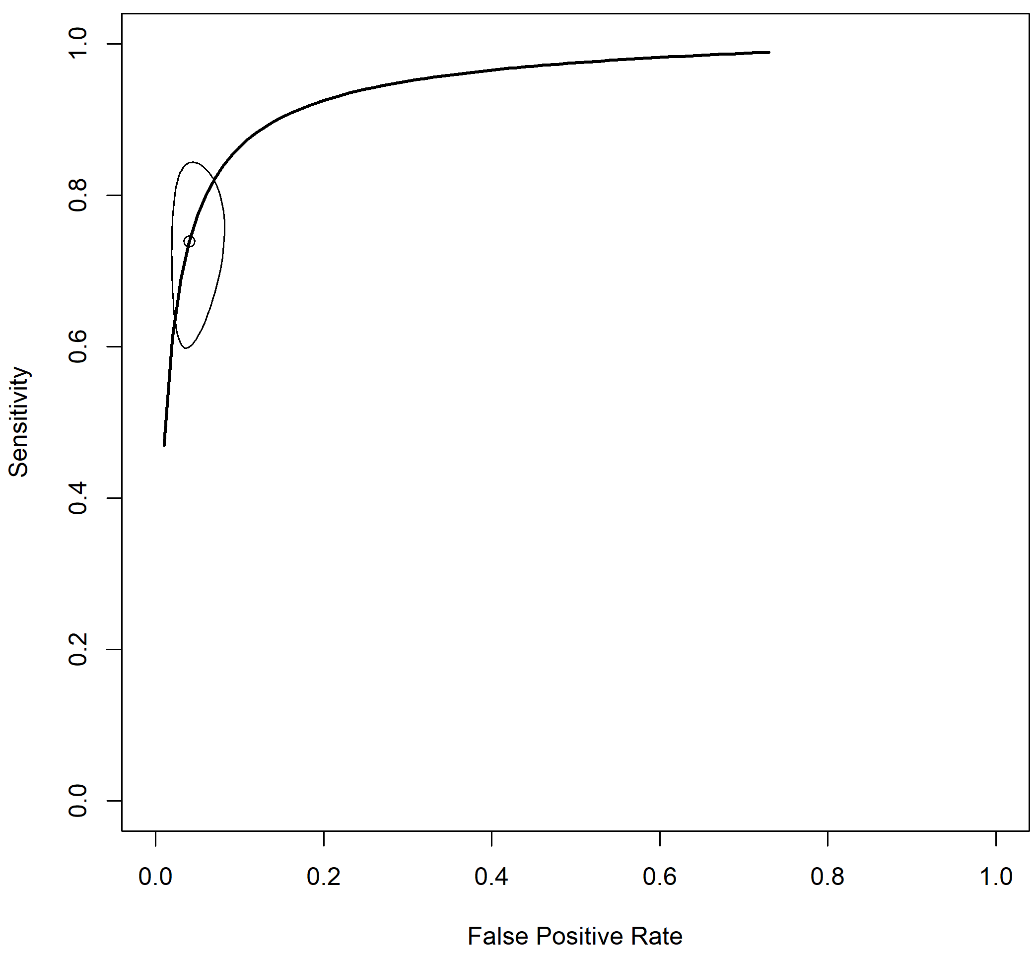


**Figure S7.** Summary ROC (SROC) plot for the IgM detection target subgroup (Reitsma; n = 29 evaluations). Study operating points are shown in ROC space together with the pooled summary estimate and confidence region, illustrating variability in sensitivity and specificity across IgM evaluations.


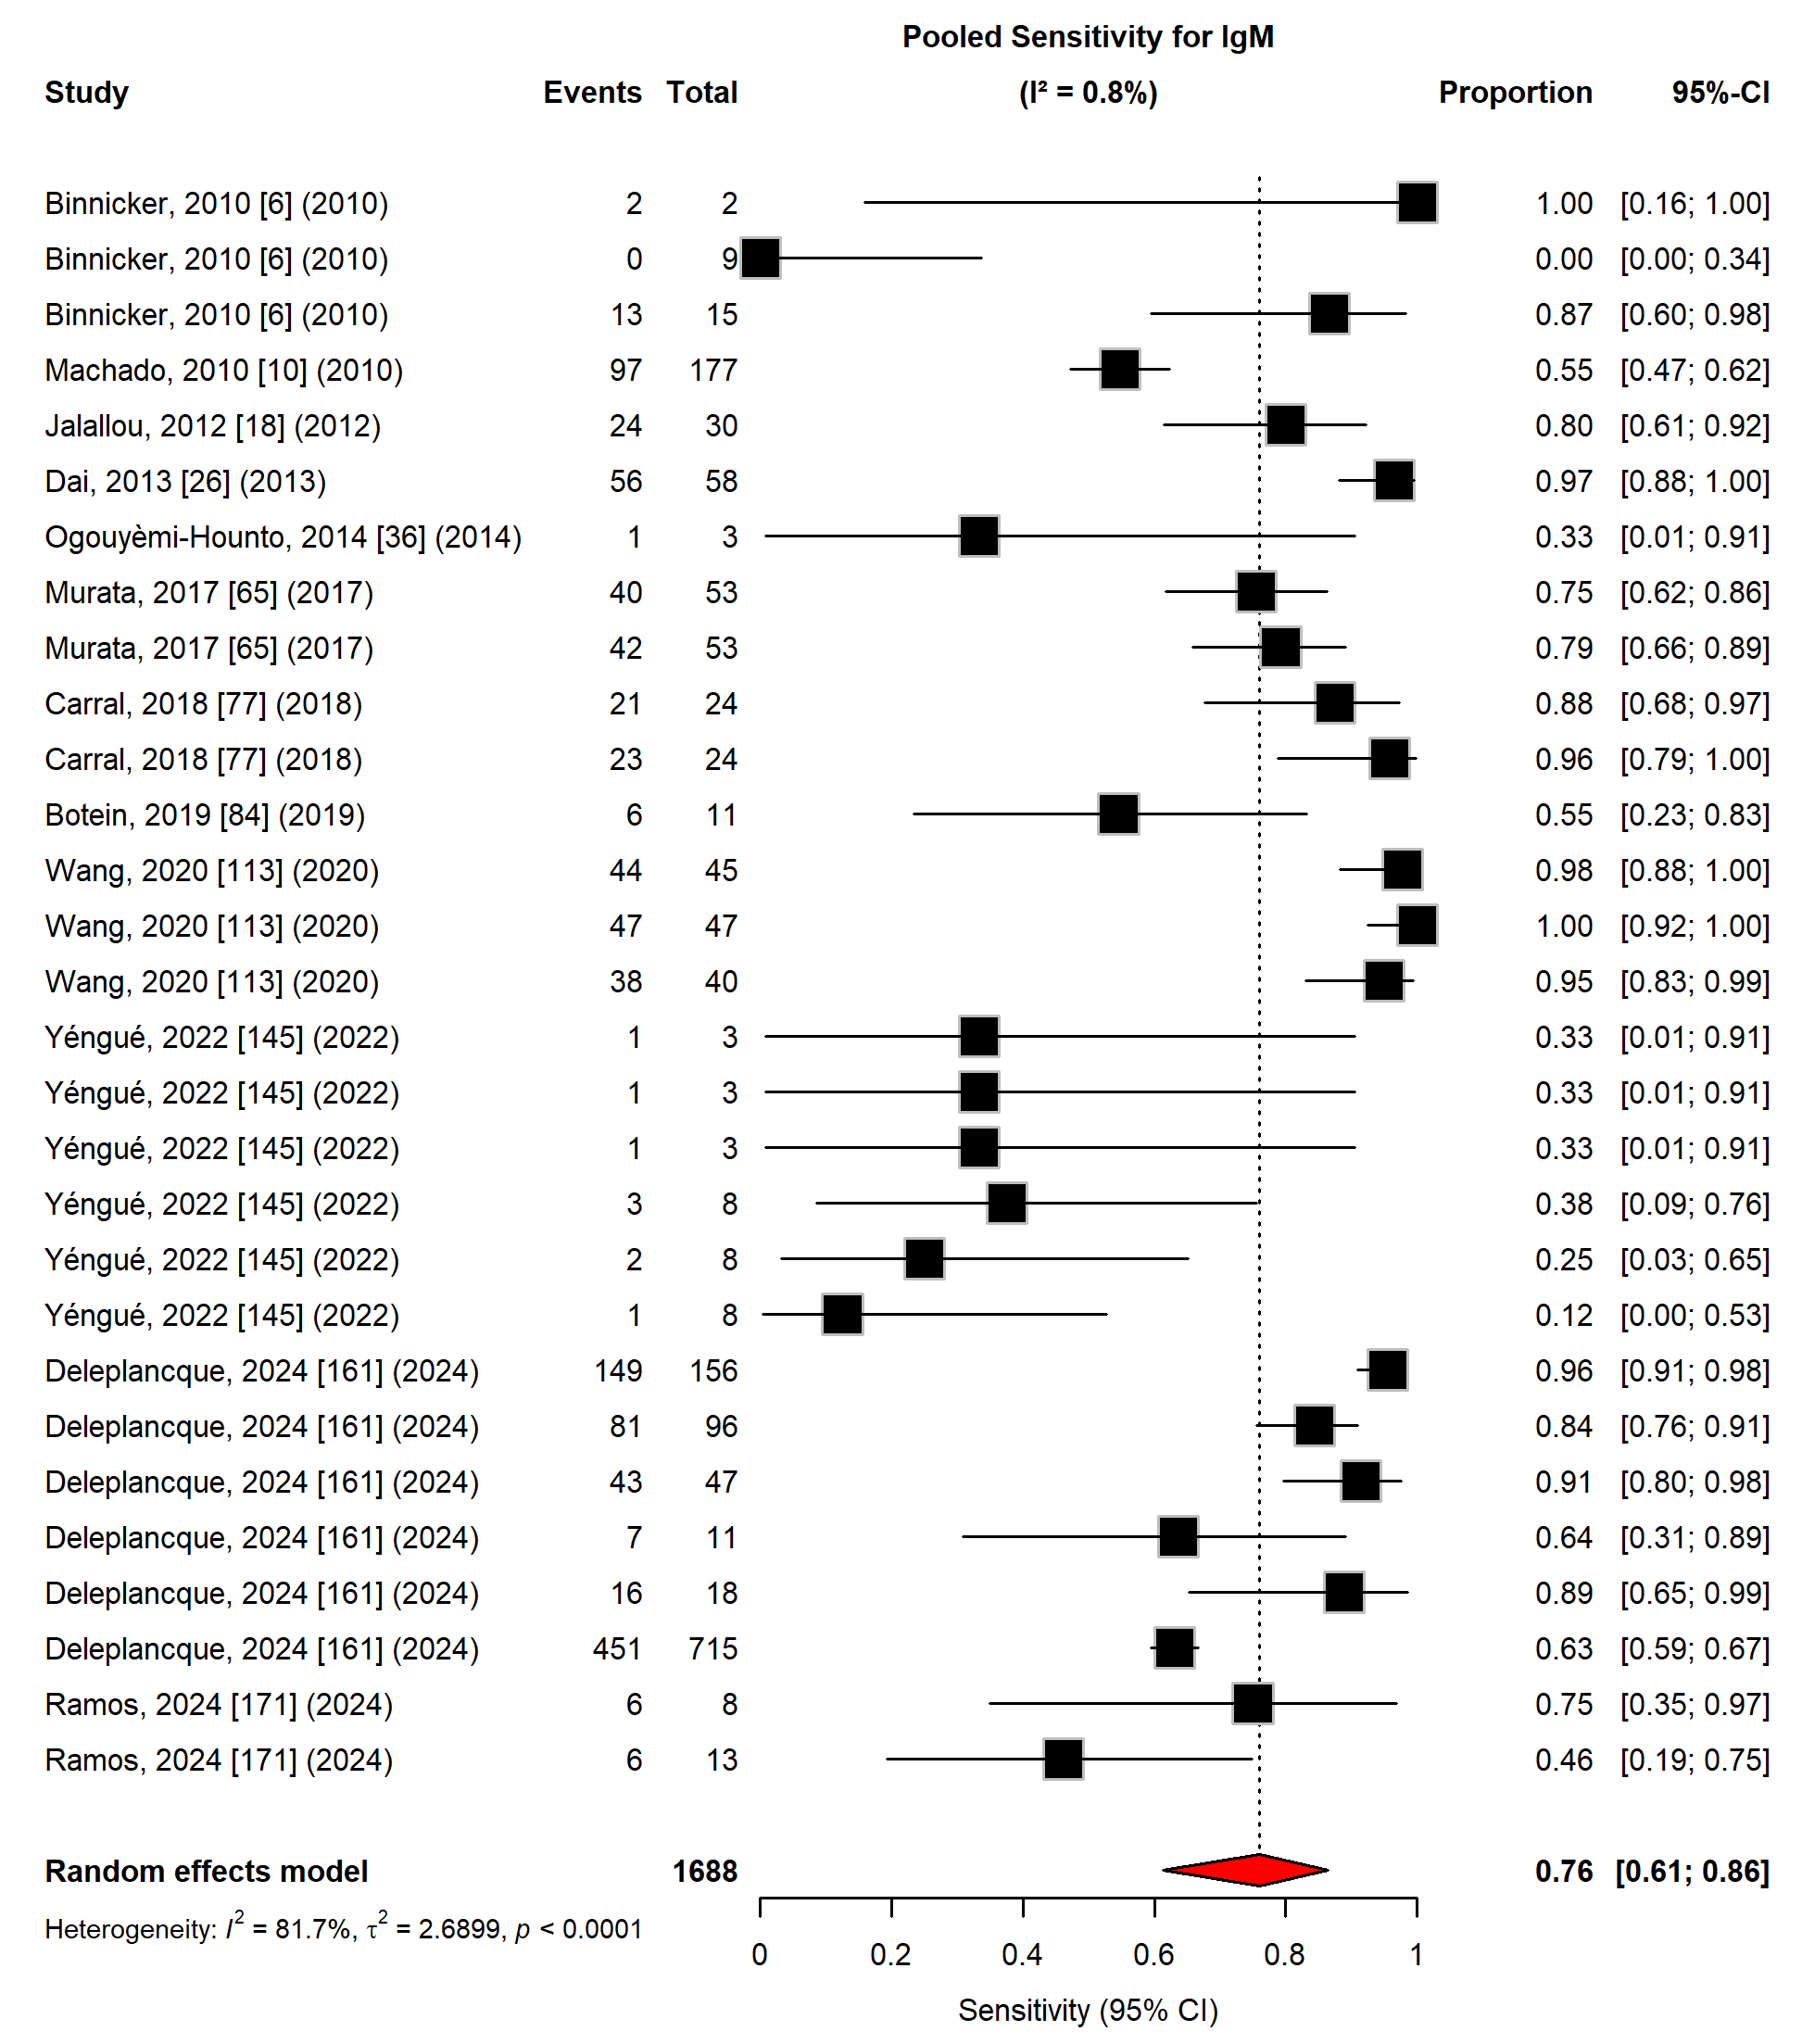


**Figure S8**. Forest plot of sensitivity for the IgM detection target subgroup (k = 29). Individual study sensitivity estimates with 95% confidence intervals are shown, highlighting variability in sensitivity across IgM evaluations.


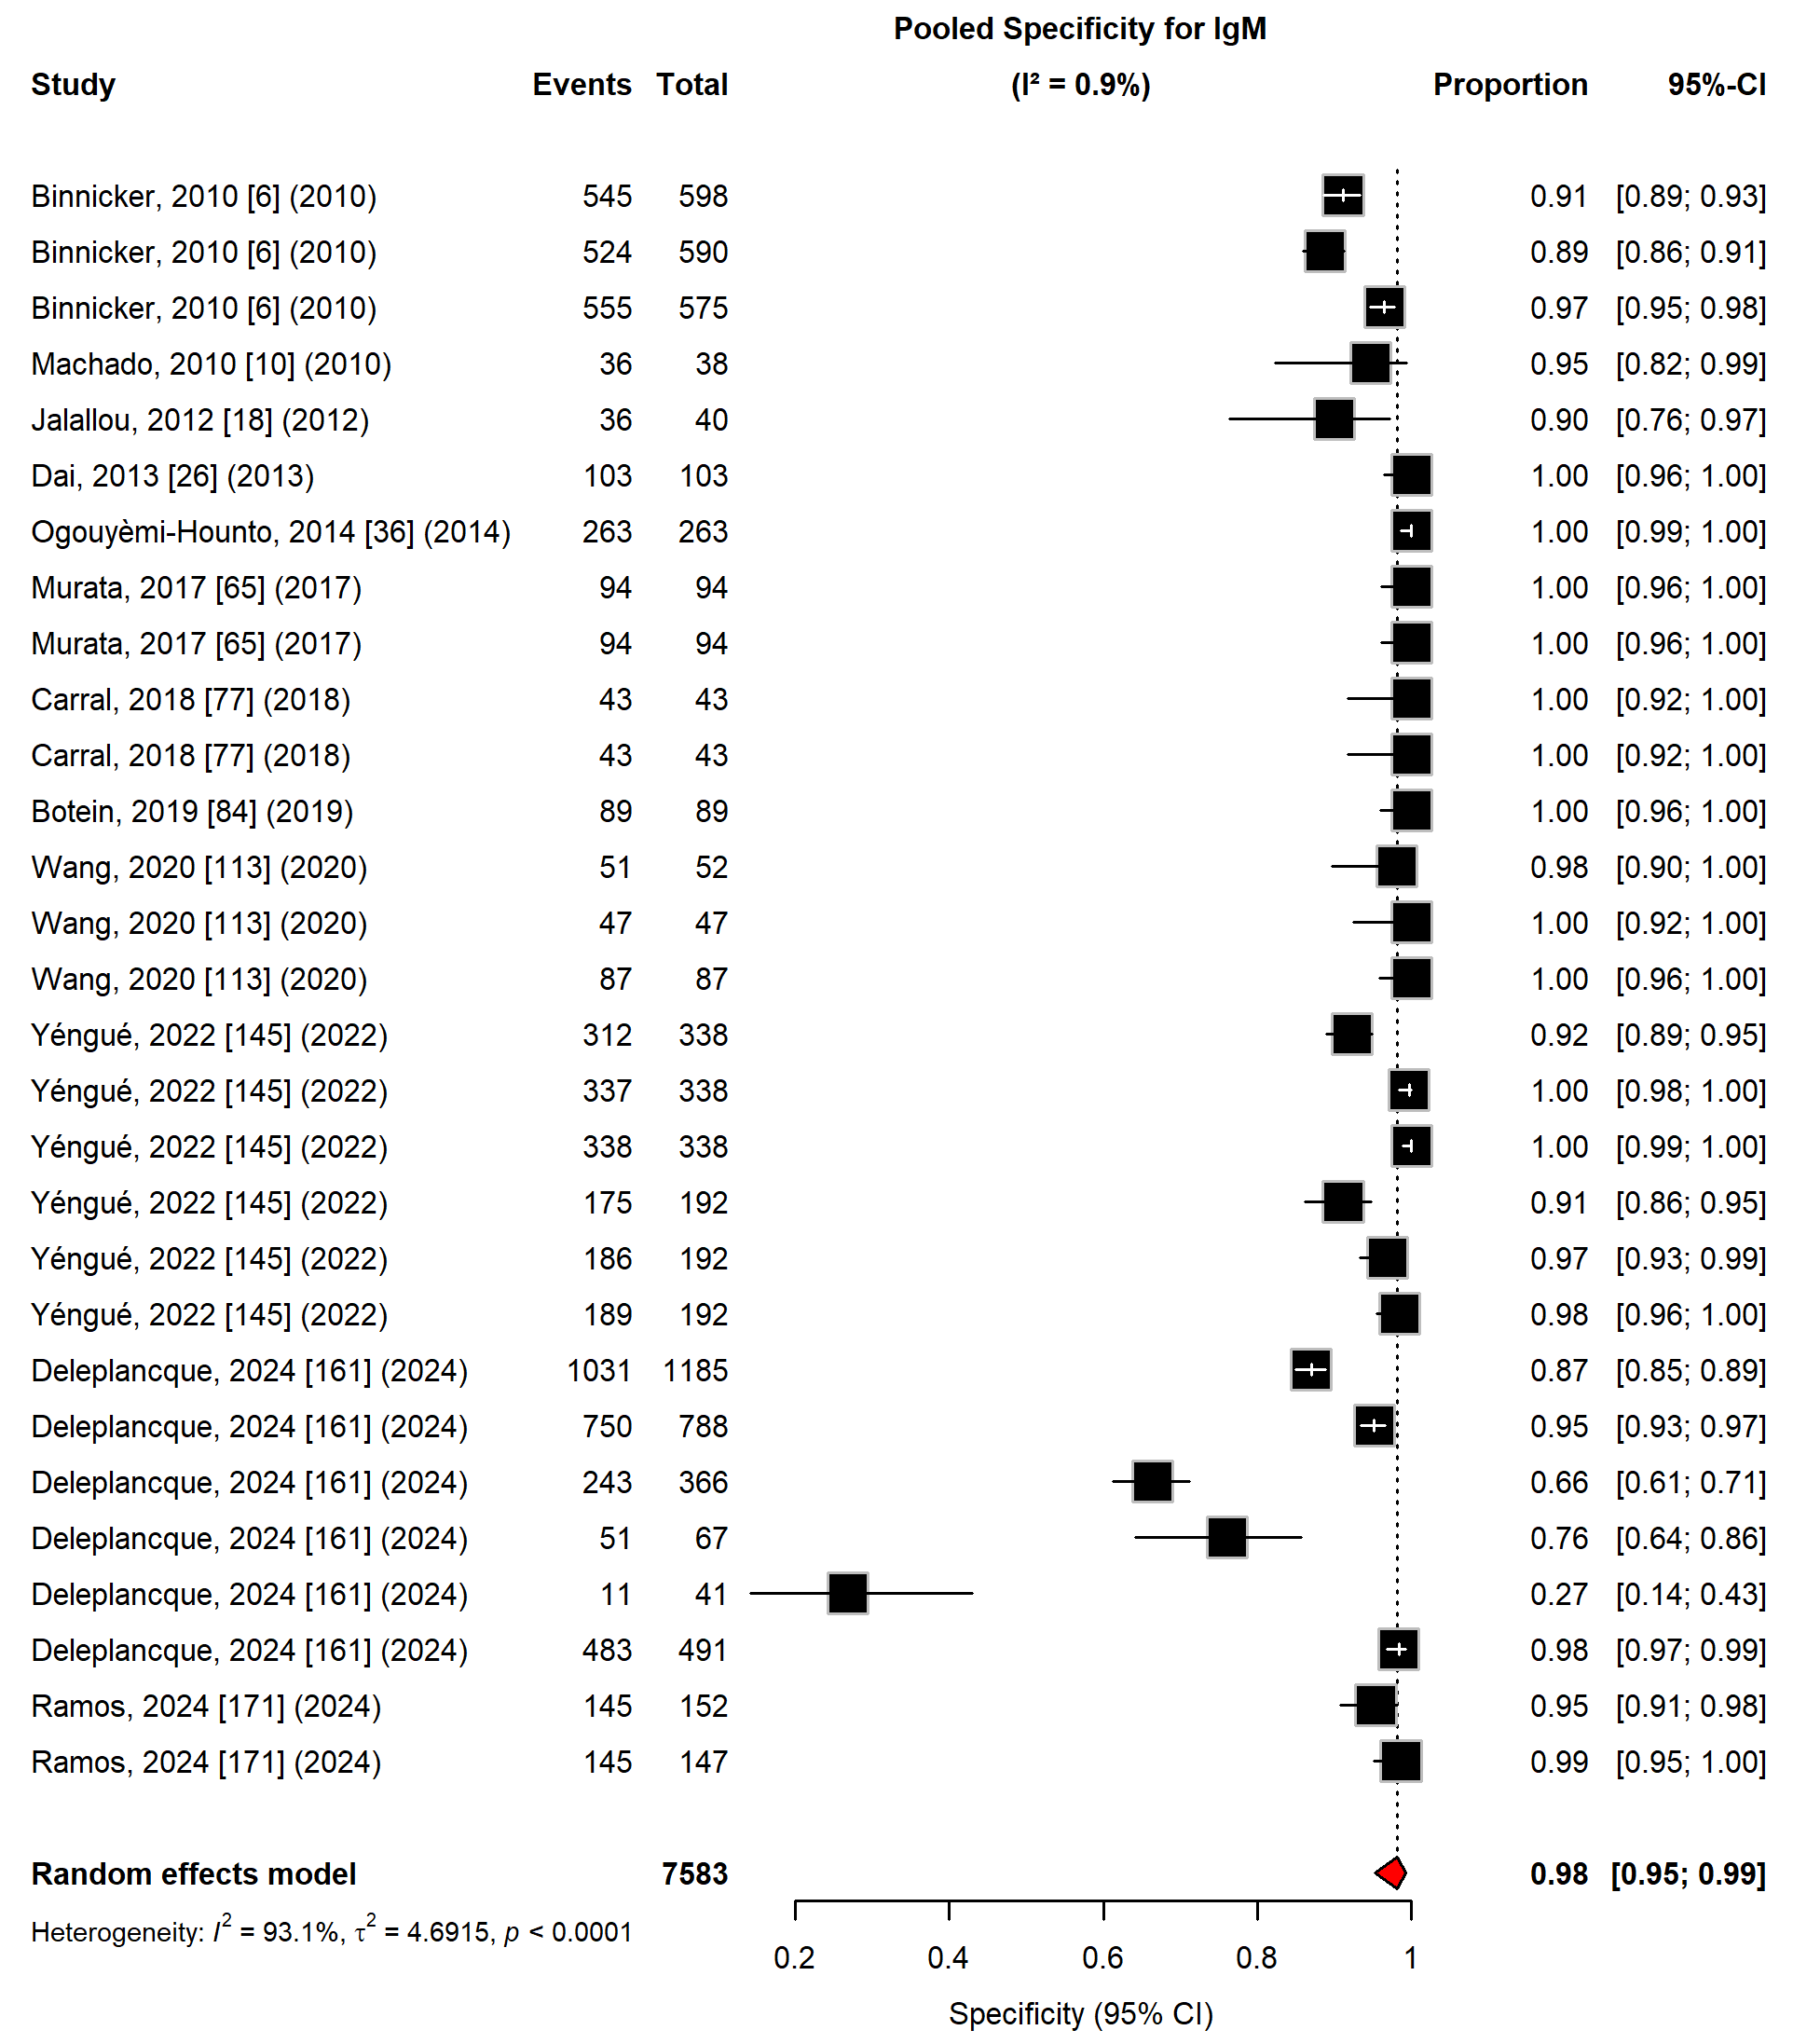


**Figure S9**. Forest plot of specificity for the IgM detection target subgroup (k = 29). Individual study specificity estimates with 95% confidence intervals are shown, illustrating between-study variability in specificity across IgM evaluations.


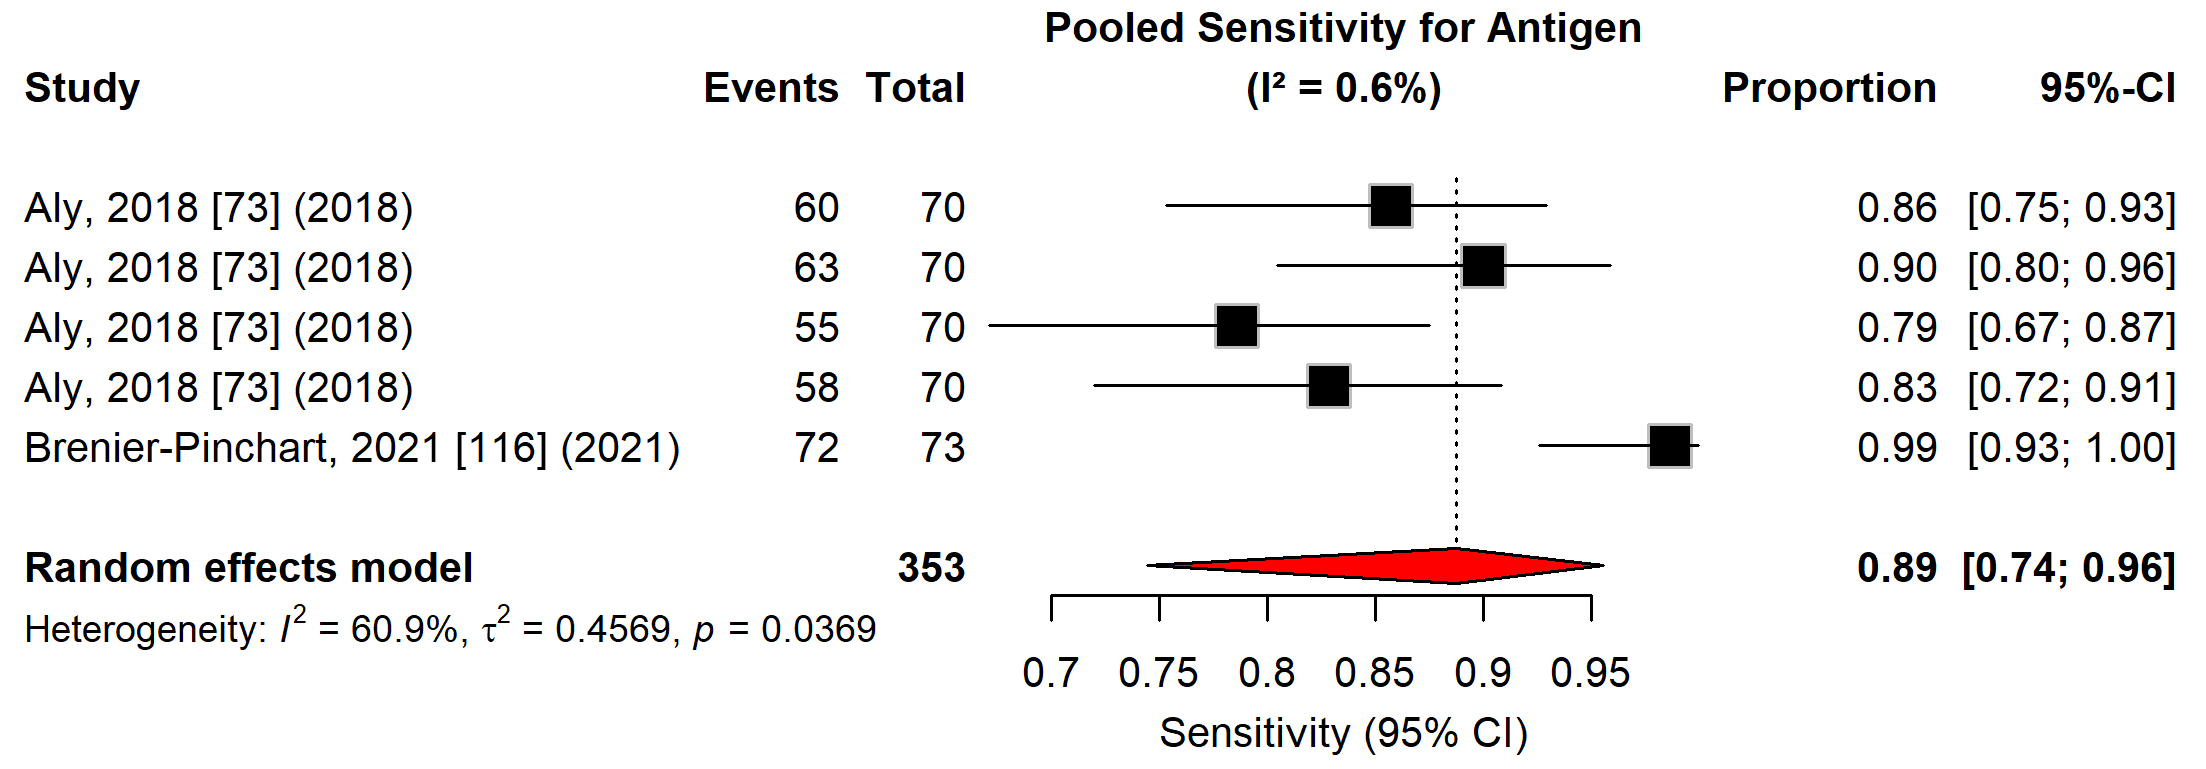


**Figure S10**. Forest plot of sensitivity for the antigen detection target subgroup (k = 5). Individual study sensitivity estimates with 95% confidence intervals are shown; interpretation should consider the limited number of evaluations.


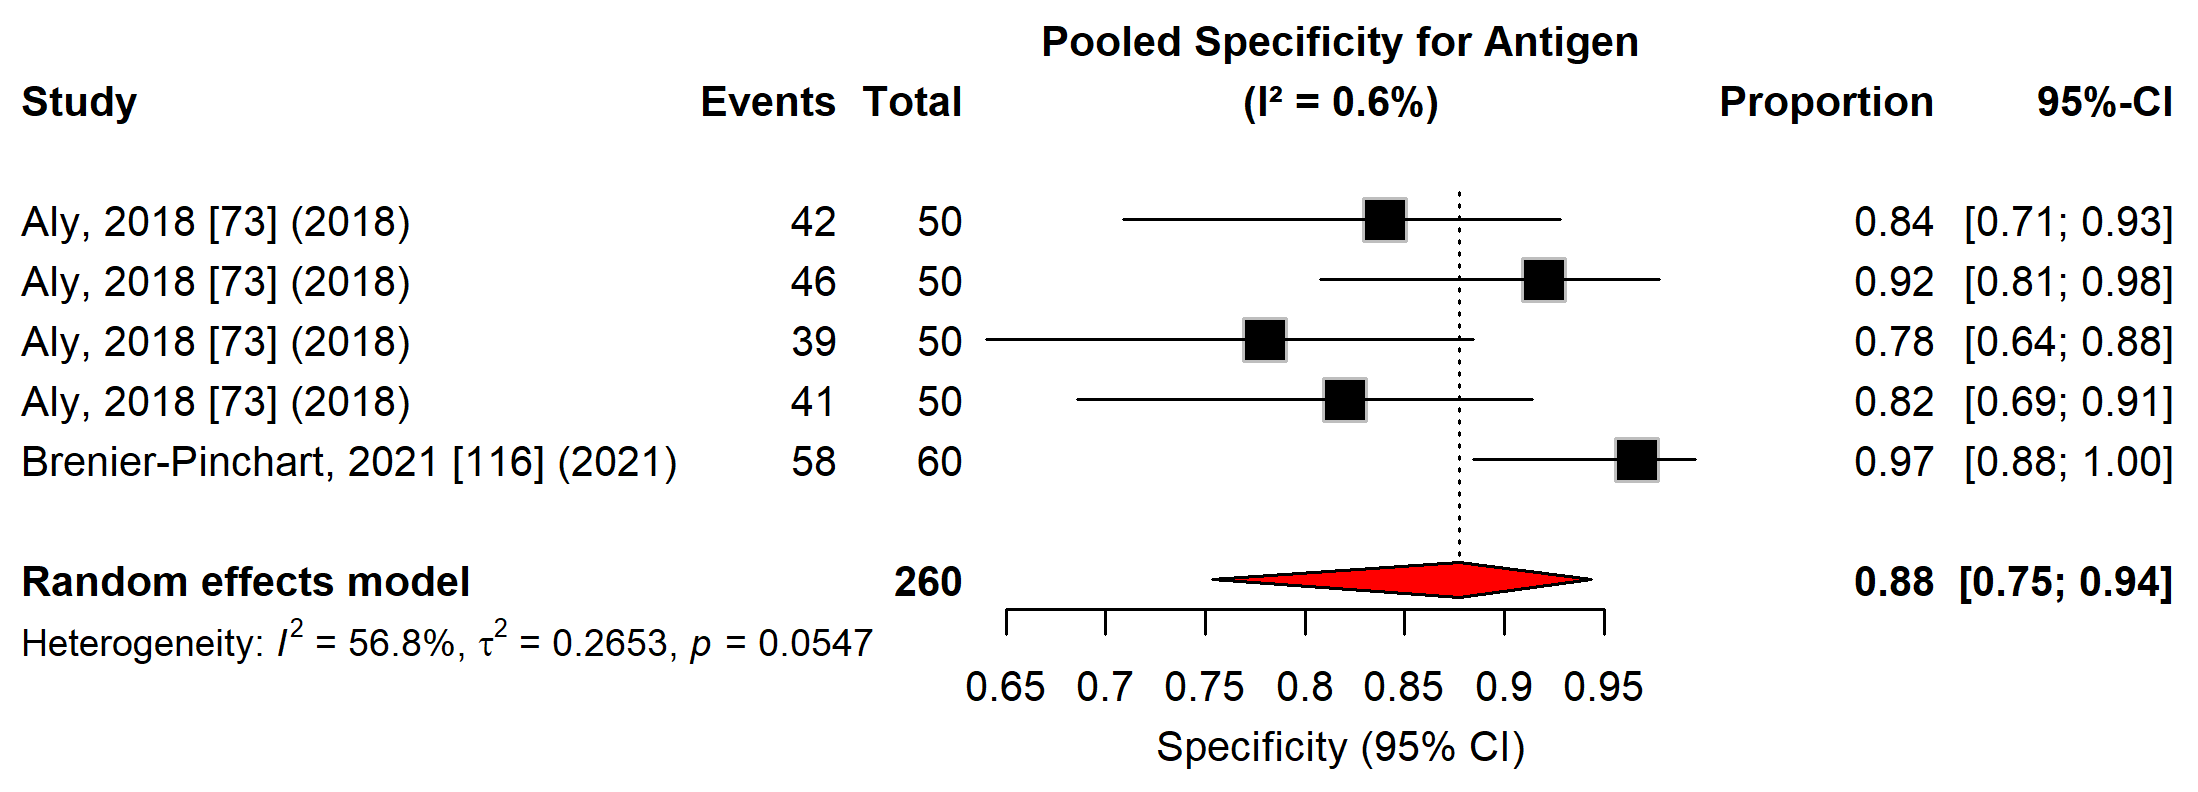


**Figure S11**. Forest plot of specificity for the antigen detection target subgroup (k = 5). Individual study specificity estimates with 95% confidence intervals are shown; interpretation should consider the limited number of evaluations.


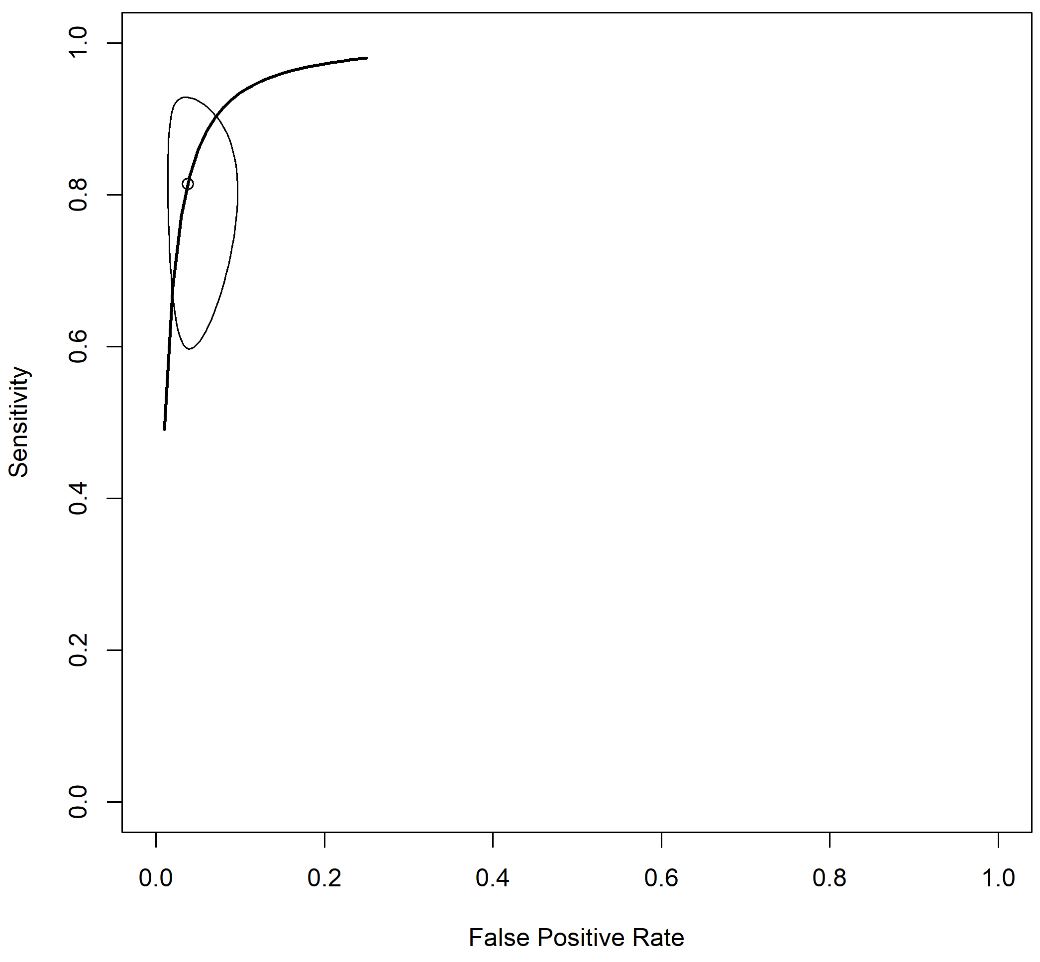


**Figure S12.** Summary ROC (SROC) plot for the Other detection-target category (Reitsma; n = 14 evaluations). Study operating points are shown in ROC space together with the pooled summary estimate and confidence region, reflecting the heterogeneity across diverse assays grouped in this category.


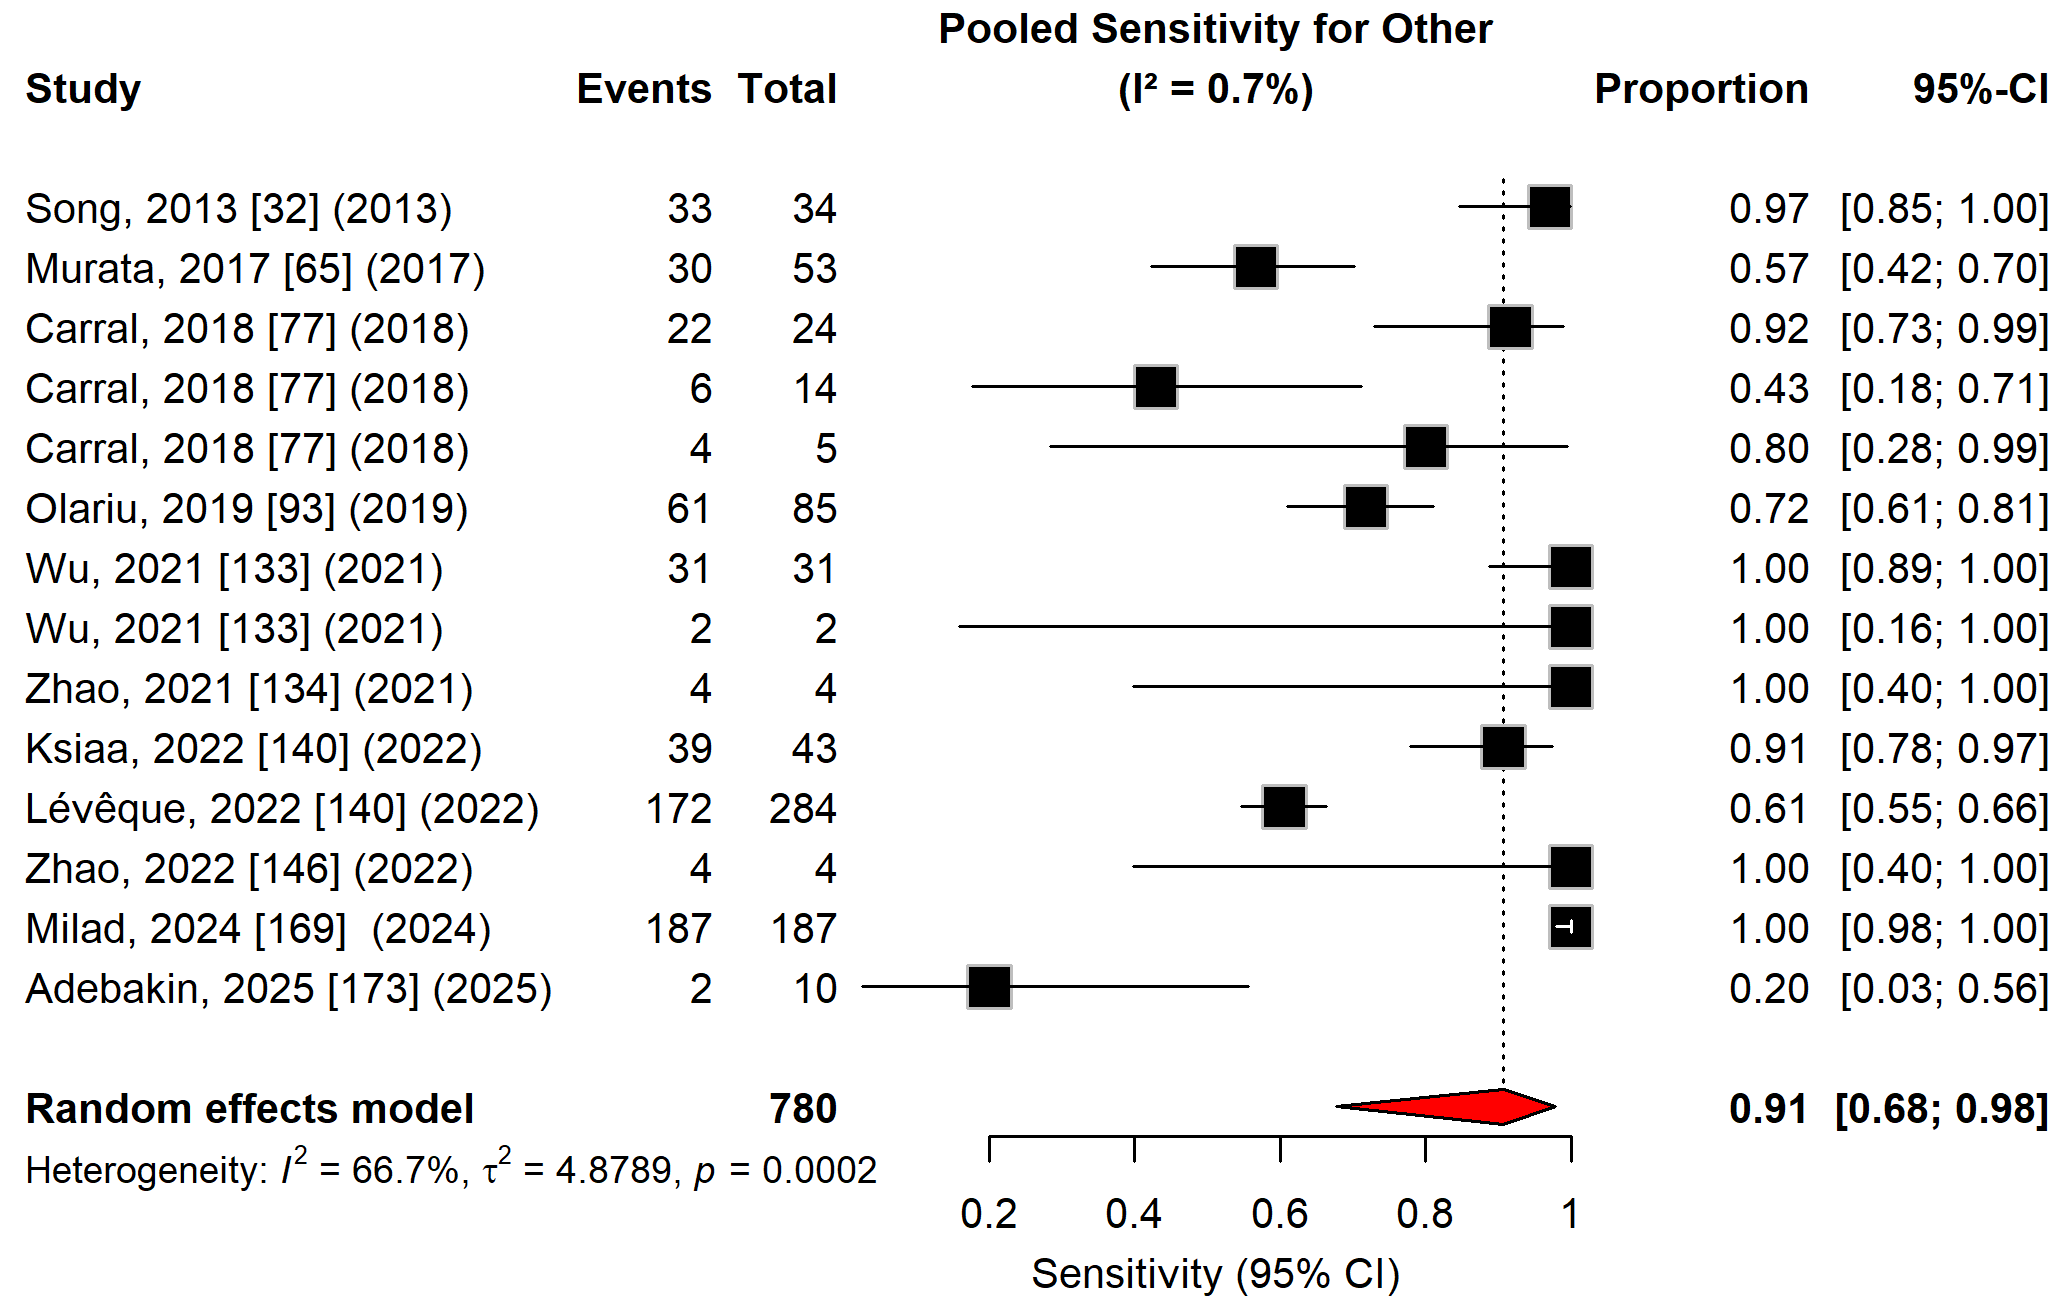


**Figure S13**. Forest plot of sensitivity for the Other detection-target category (k = 14). Individual study sensitivity estimates with 95% confidence intervals are shown, illustrating variability across heterogeneous assays included in this grouping.


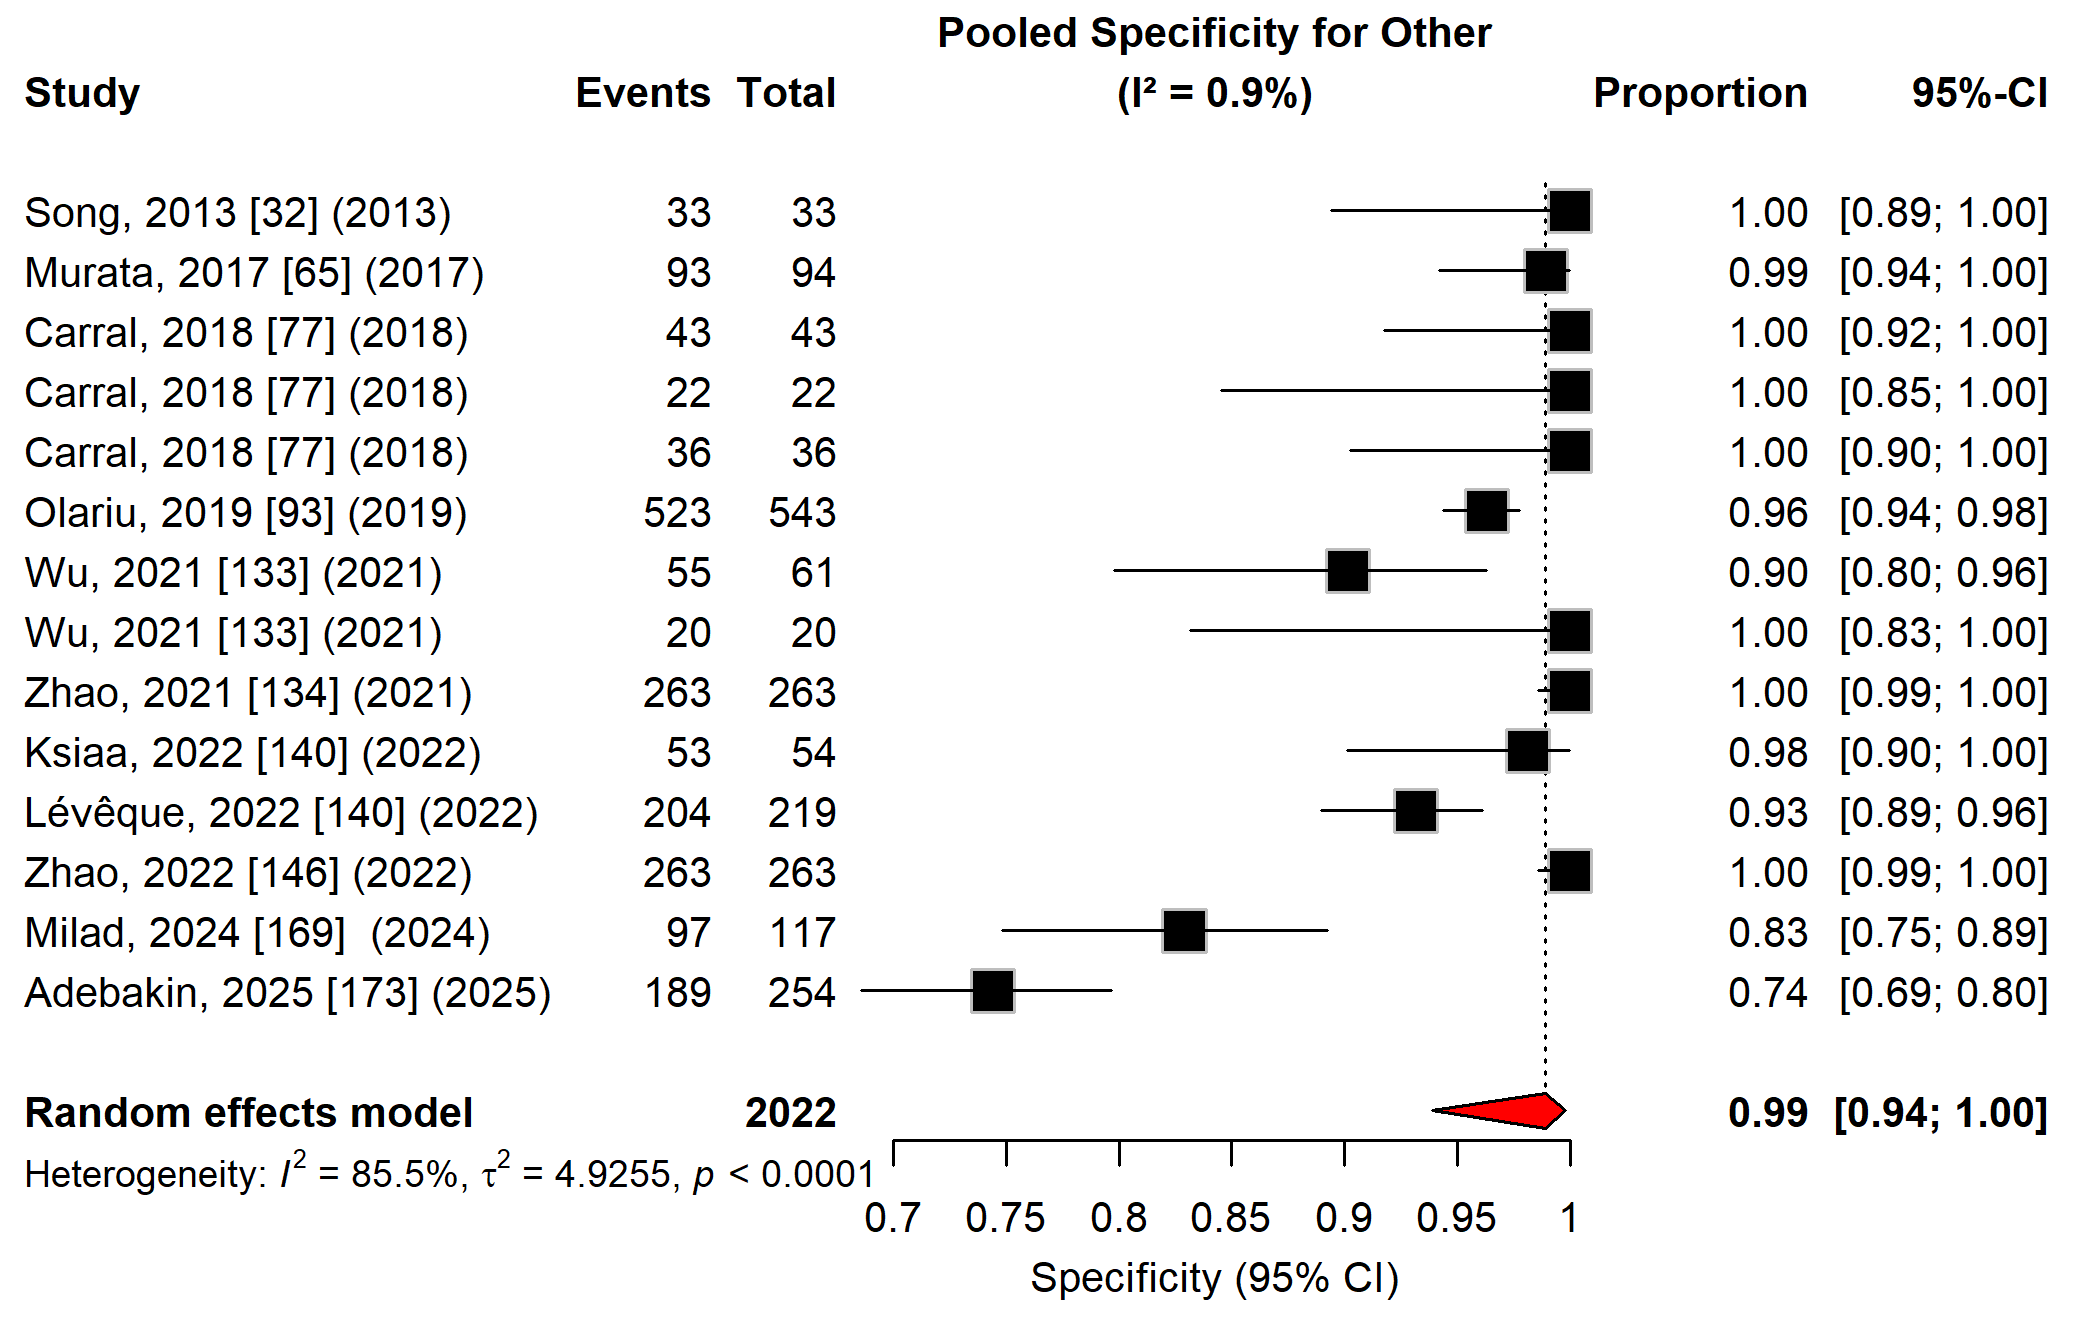


**Figure S14**. Forest plot of specificity for the Other detection-target category (k = 14). Individual study specificity estimates with 95% confidence intervals are shown, highlighting heterogeneity across diverse assays grouped under this category.


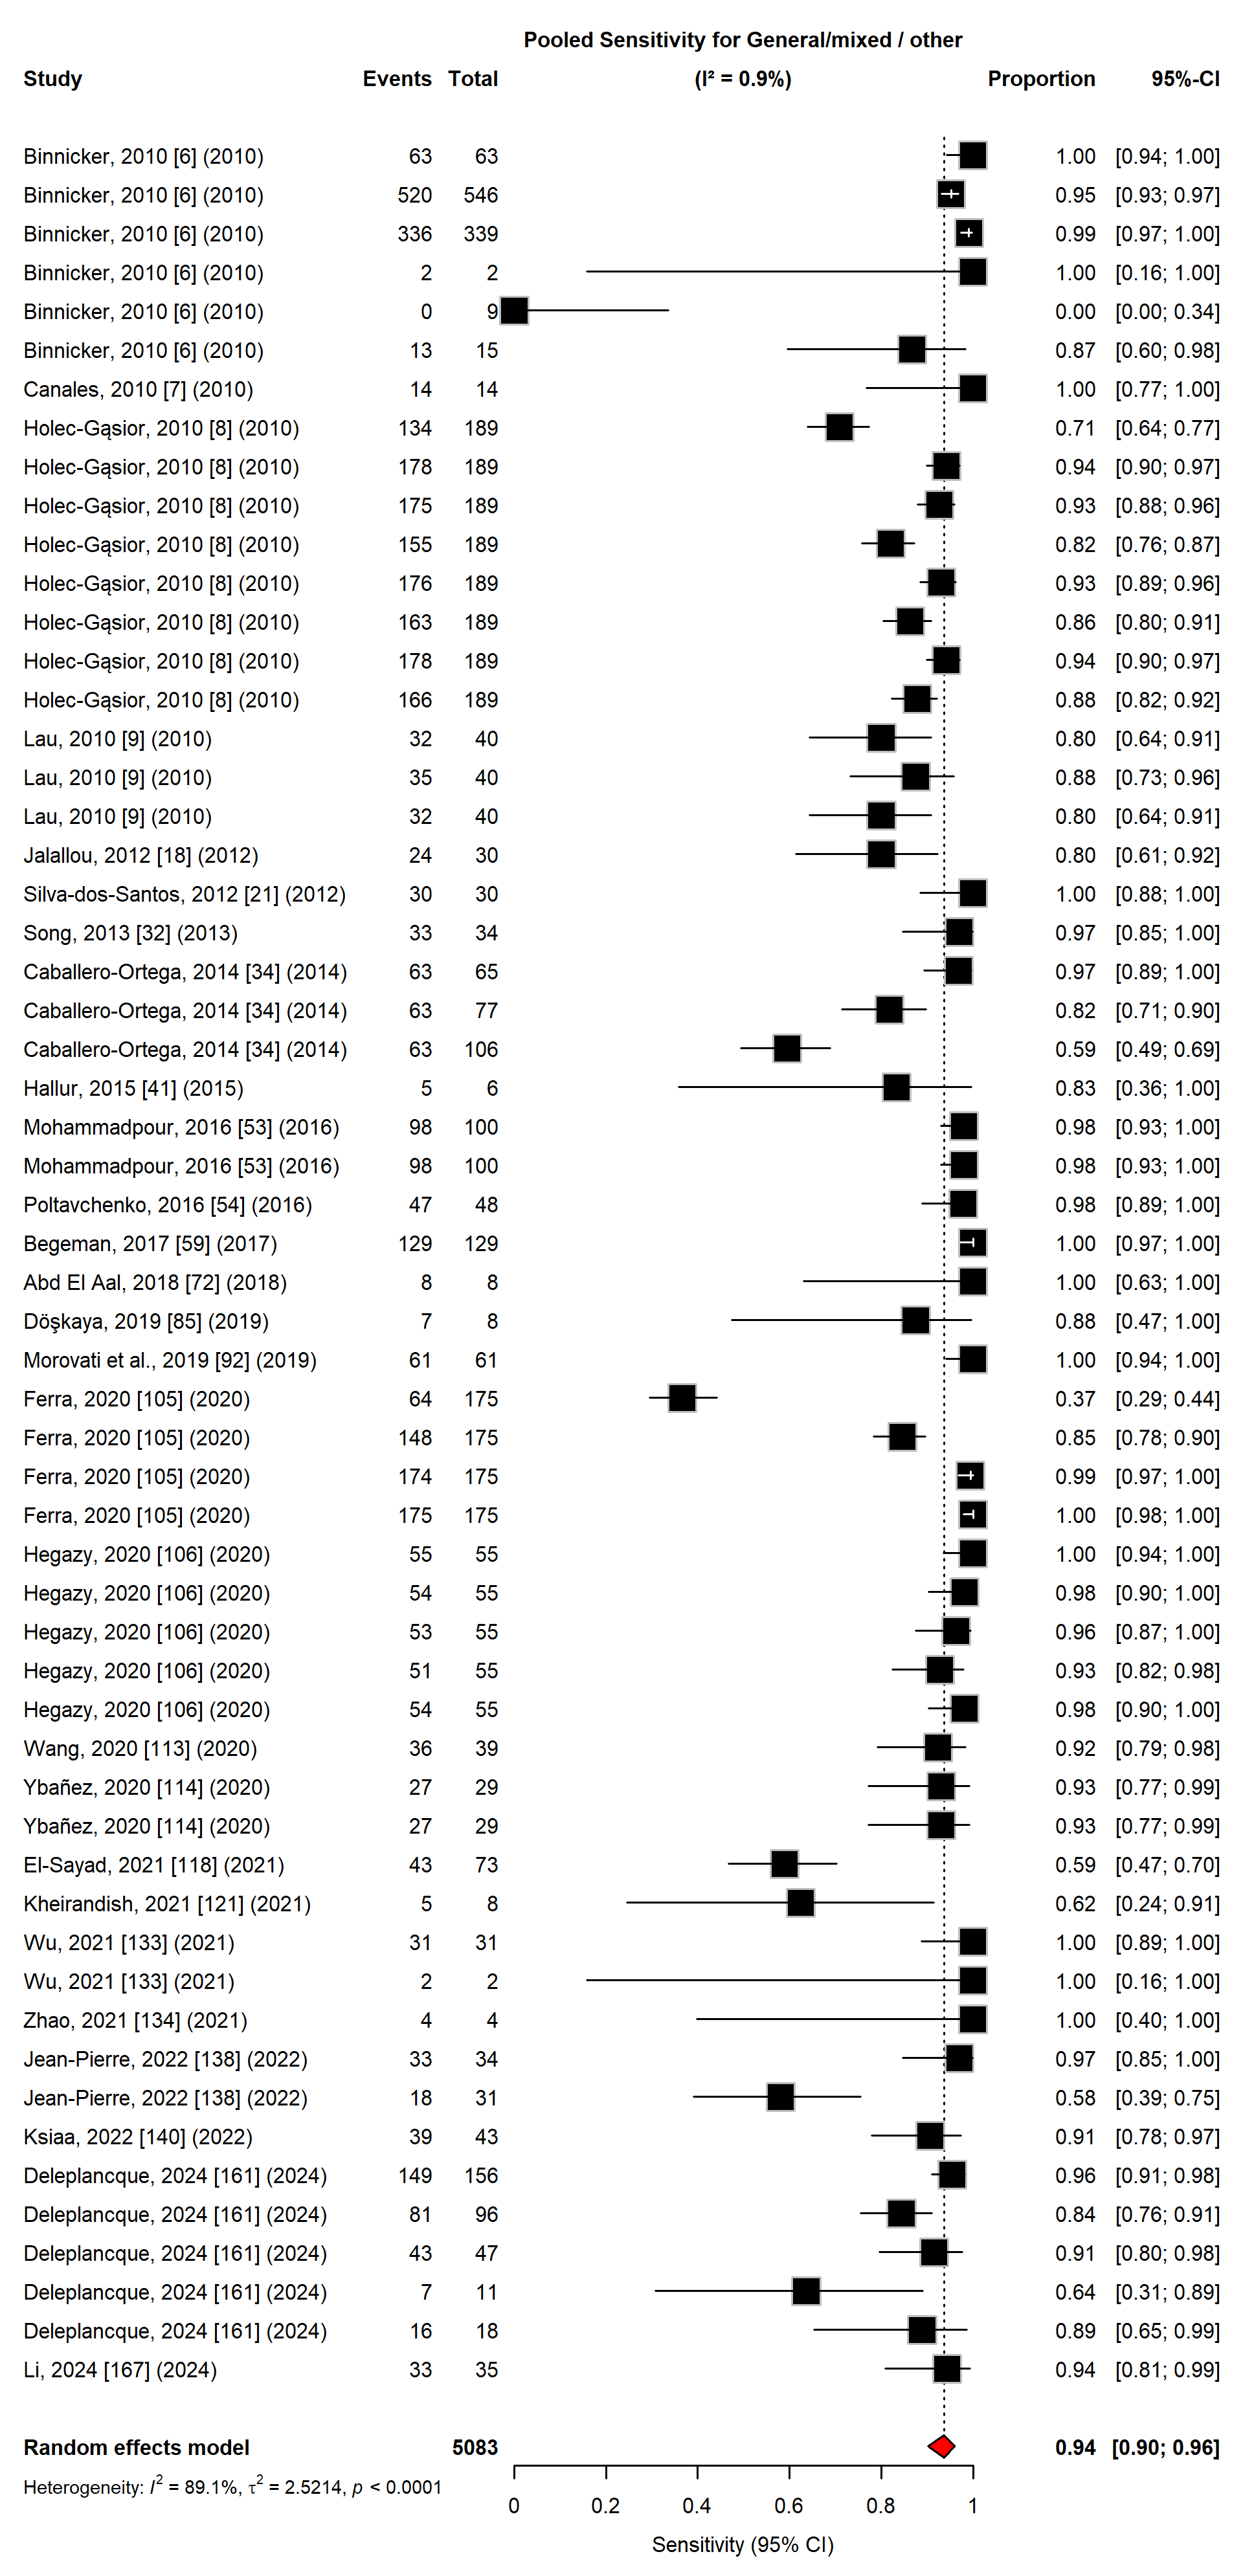


**Figure S15**. Forest plot of sensitivity for the general/mixed/other population subgroup (k = 58). Individual study sensitivity estimates with 95% confidence intervals are shown, illustrating between-study variability in sensitivity across heterogeneous cohorts.


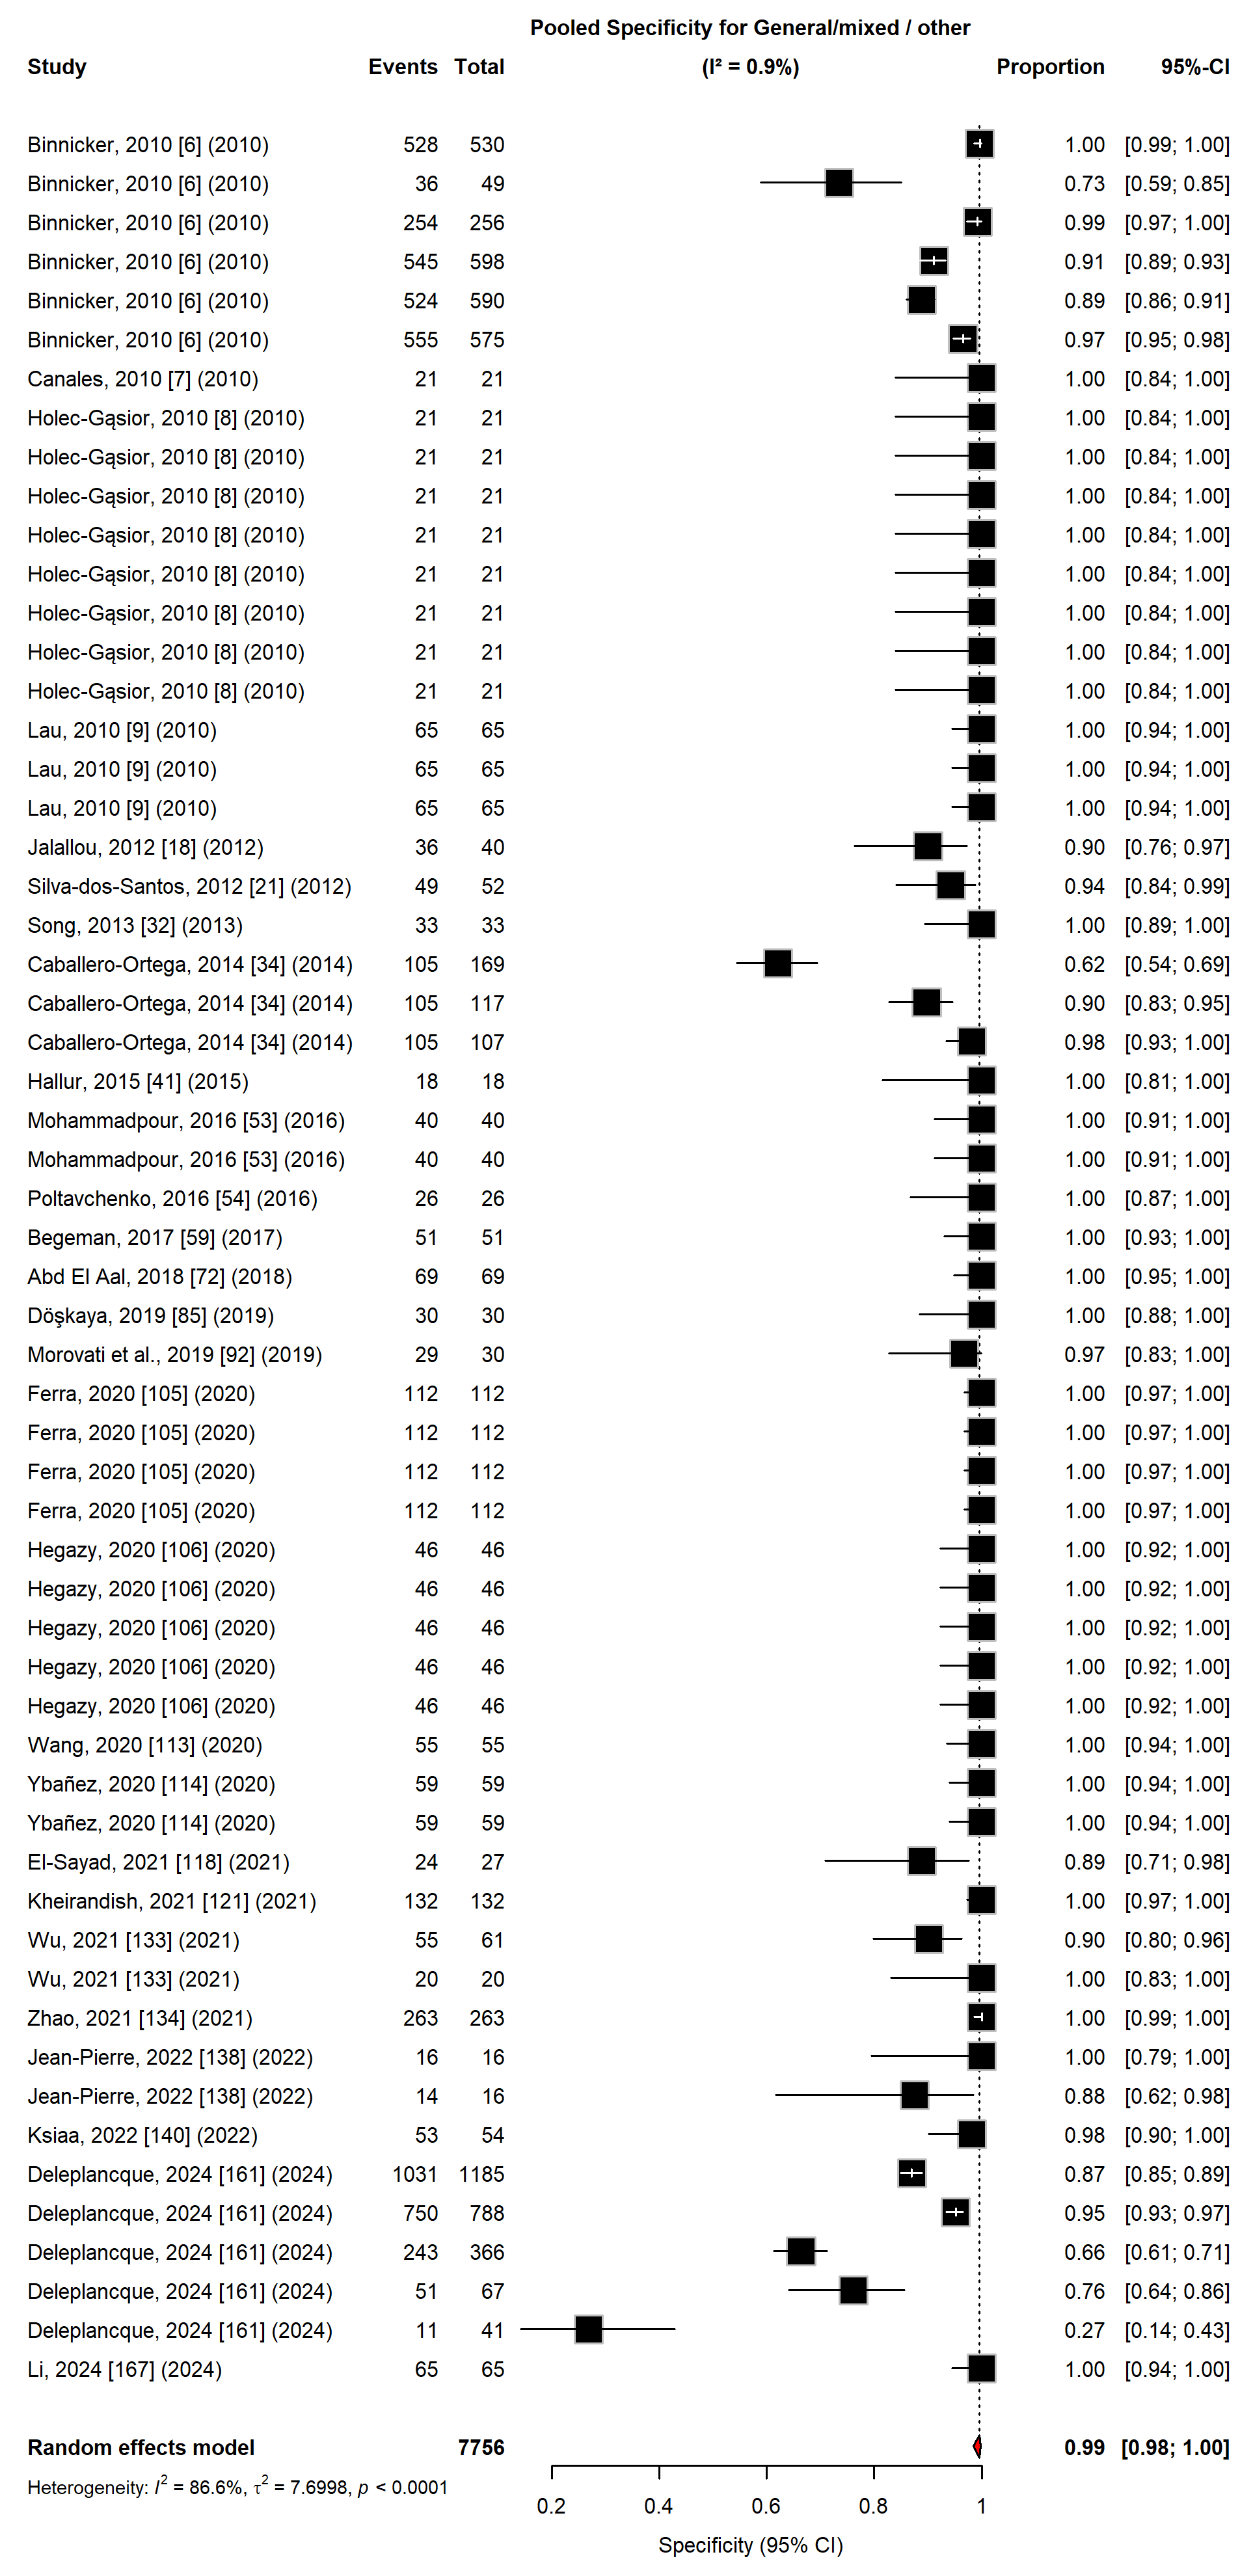


**Figure S16.** Forest plot of specificity for the general/mixed/other population subgroup (k = 58). Individual study specificity estimates with 95% confidence intervals are shown, highlighting between-study heterogeneity in specificity across mixed real-world cohorts.


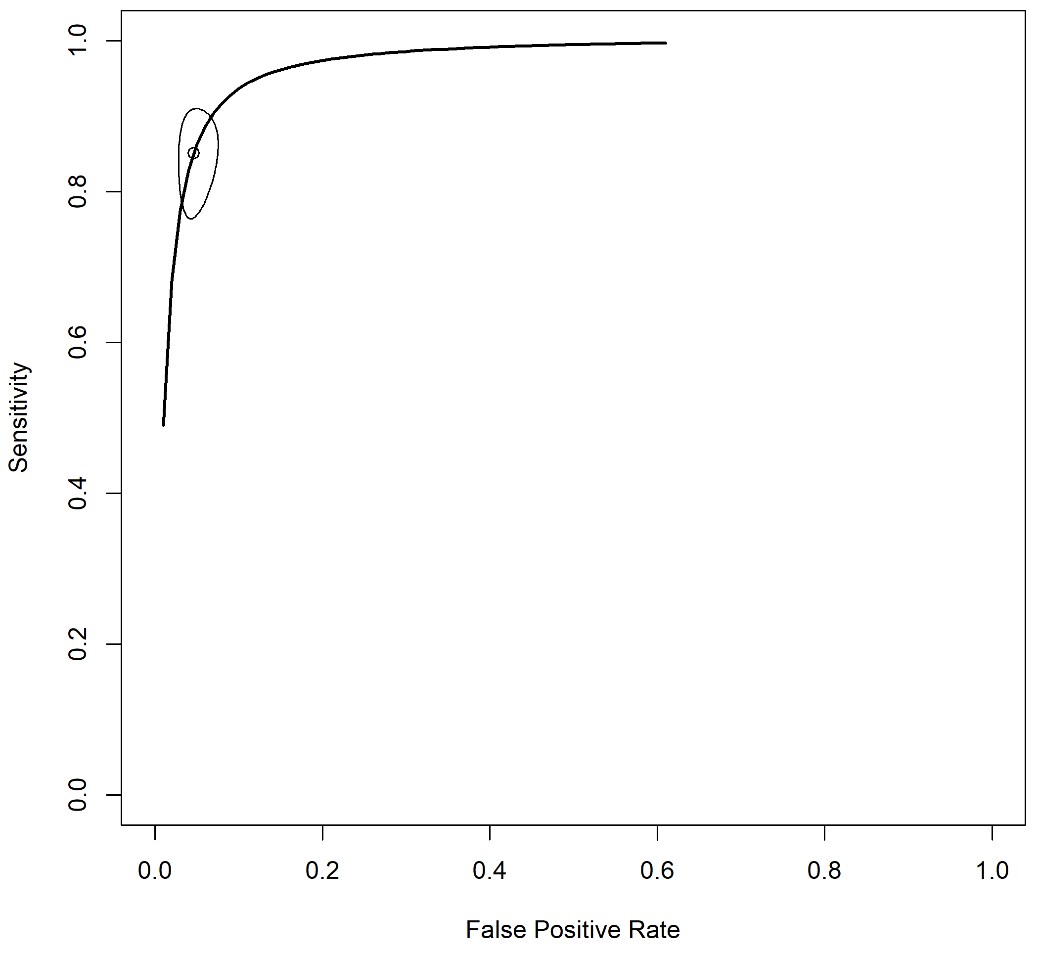


**Figure S17.** Summary ROC (SROC) plot for the pregnancy/antenatal population subgroup (Reitsma; n = 74 evaluations). Study operating points are displayed in ROC space together with the pooled summary estimate and its uncertainty, illustrating dispersion and heterogeneity across pregnancy/antenatal cohorts.


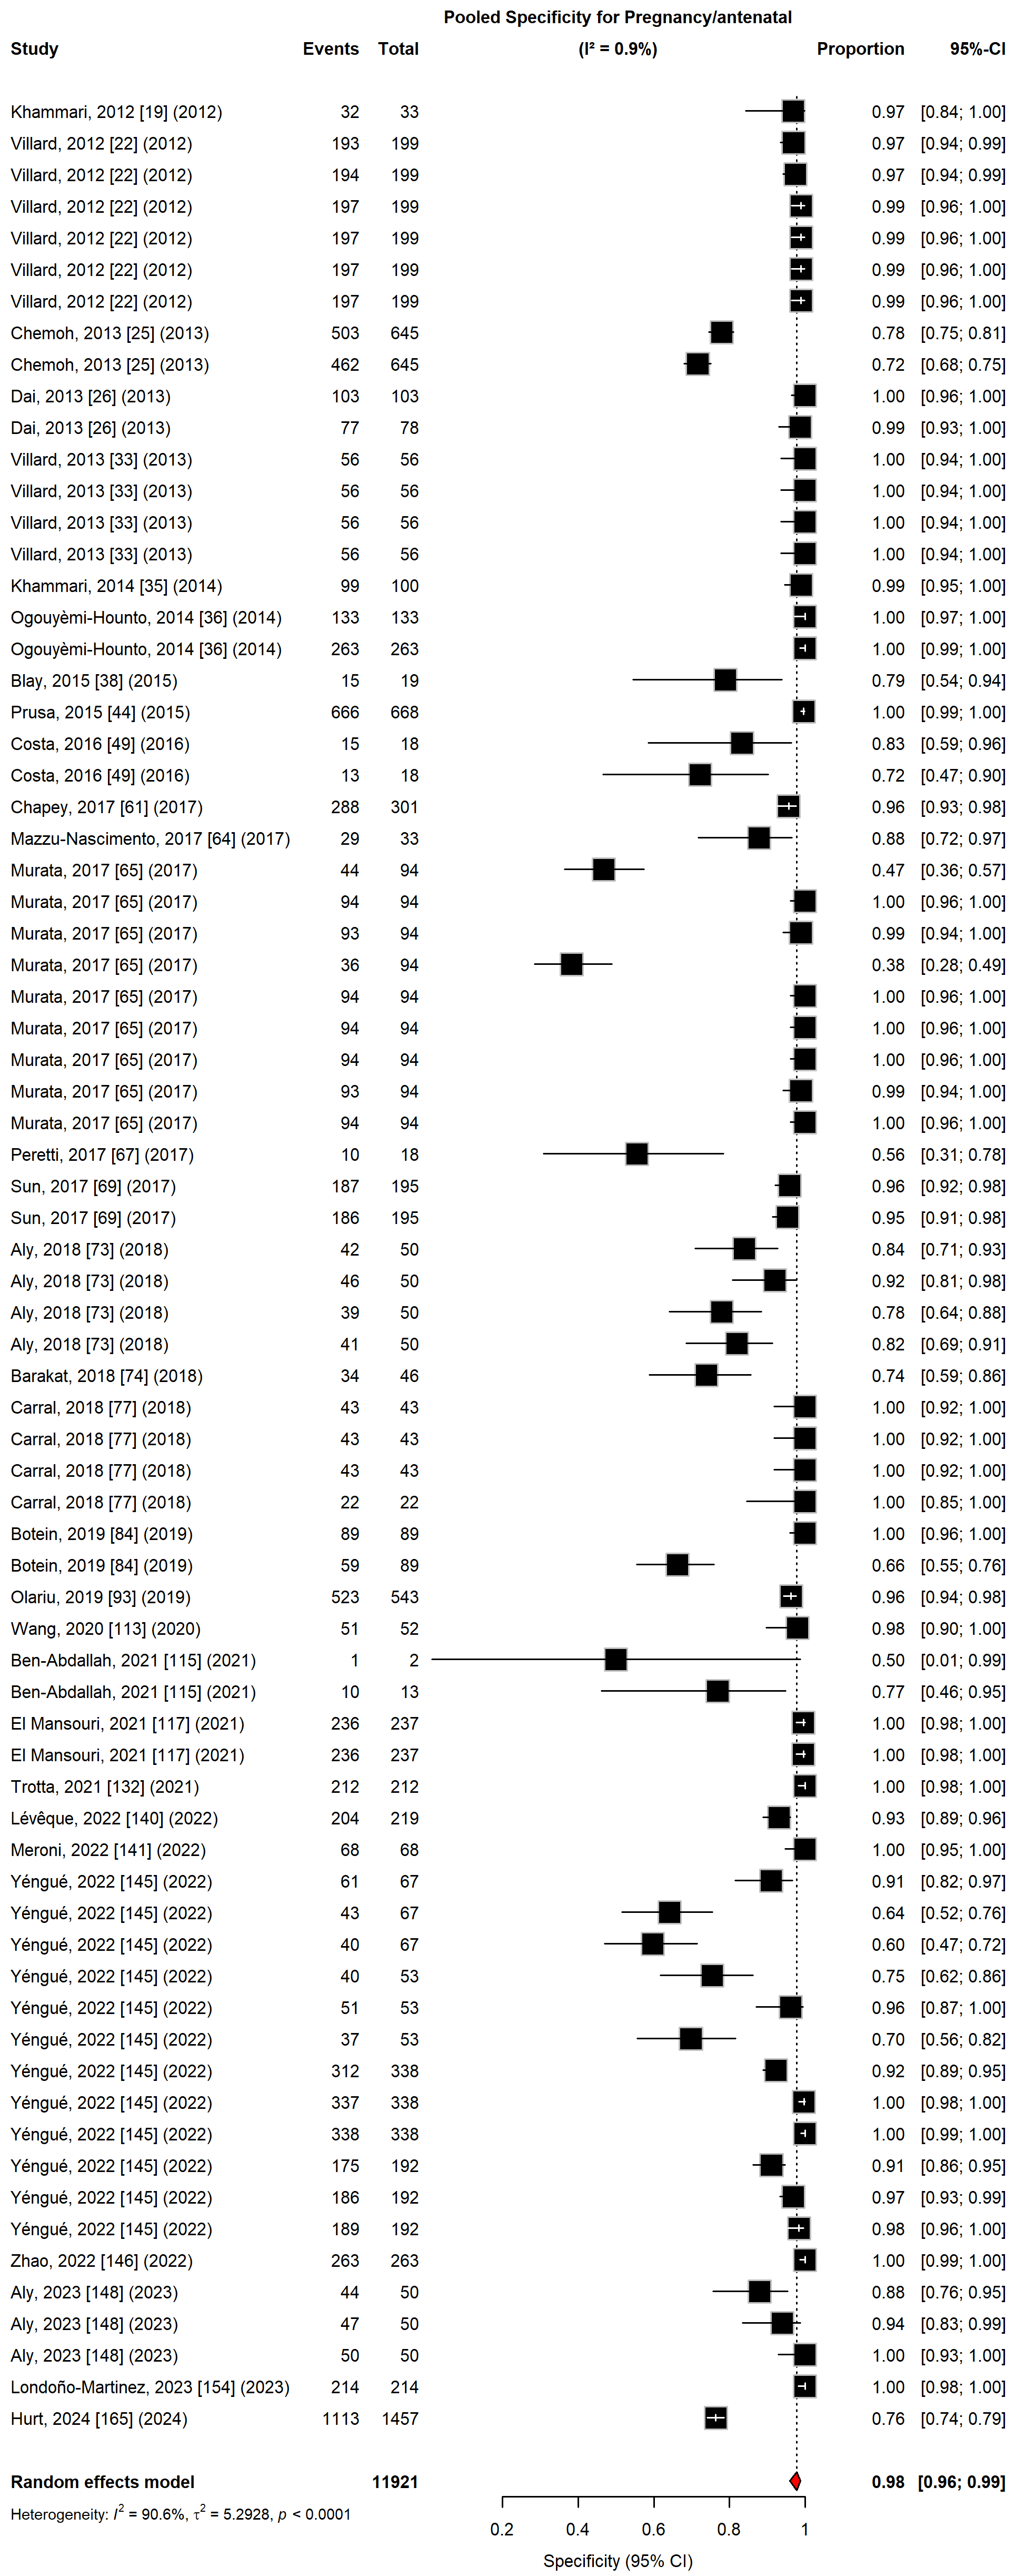


**Figure S18.** Forest plot of specificity for the pregnancy/antenatal population subgroup (k = 74). Individual study specificity estimates with 95% confidence intervals are shown, illustrating between-study variability within pregnancy/antenatal evaluations.


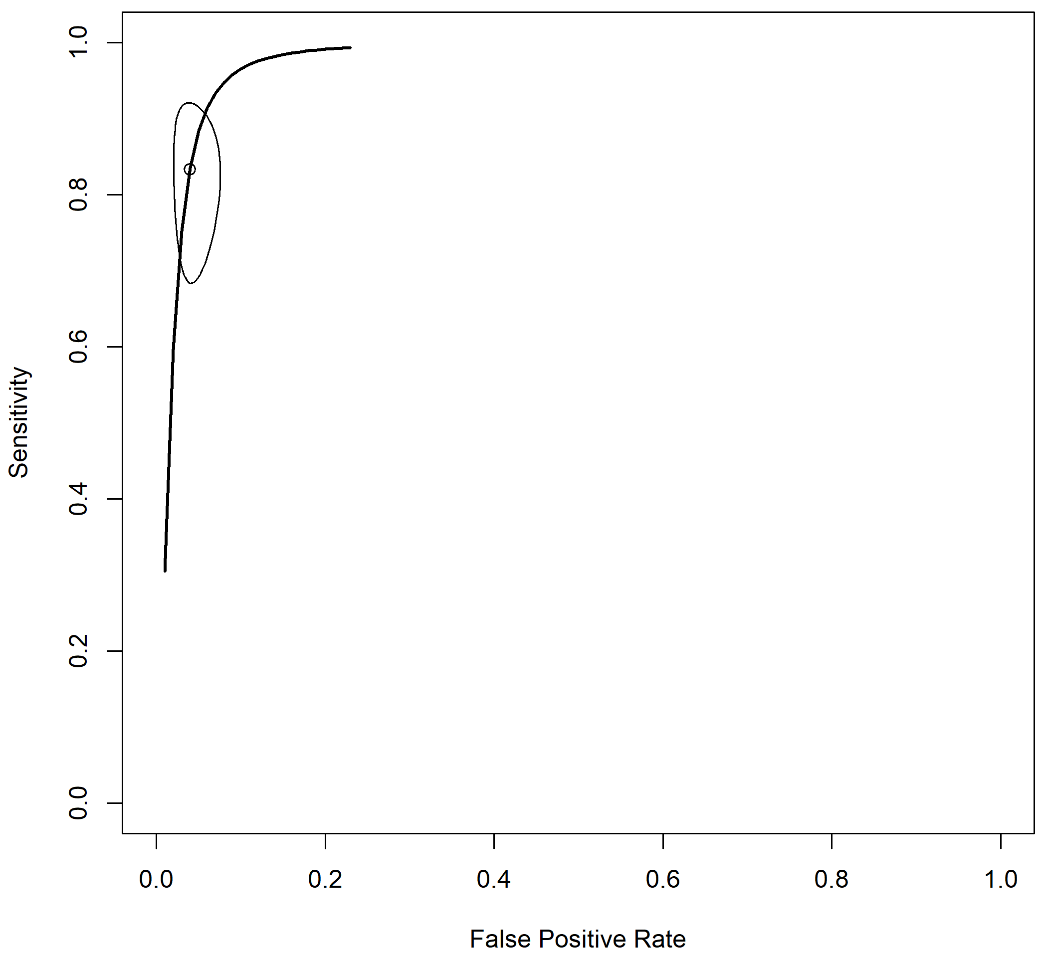


**Figure S19.** Summary ROC (SROC) plot for the congenital/newborn/infant population subgroup (Reitsma; n = 16 evaluations). Study operating points are displayed in ROC space with the pooled summary estimate and confidence region, illustrating subgroup performance and between-study variability.


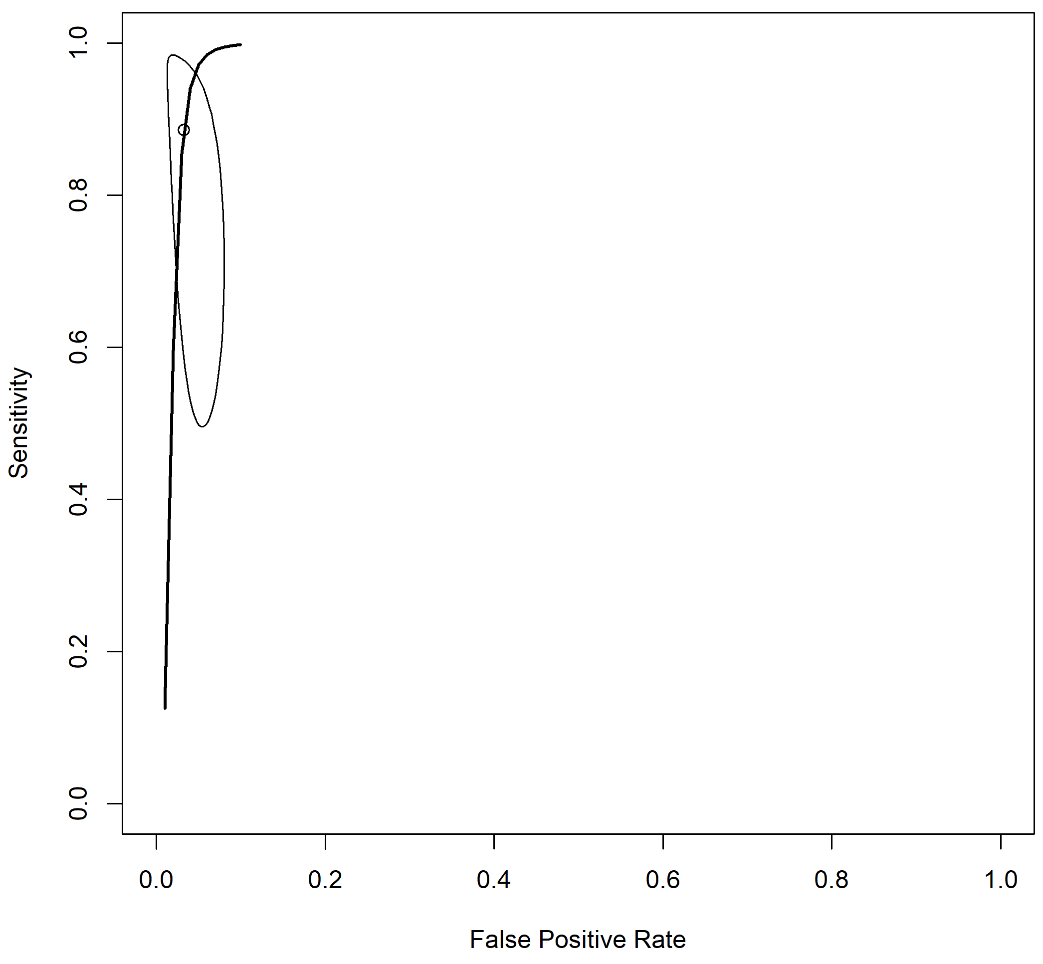


**Figure S20.** Summary ROC (SROC) plot for the HIV/AIDS population subgroup (Reitsma; n = 10 evaluations). Study operating points are displayed in ROC space with the pooled summary estimate and confidence region; interpretation should consider the limited number of evaluations and observed heterogeneity.


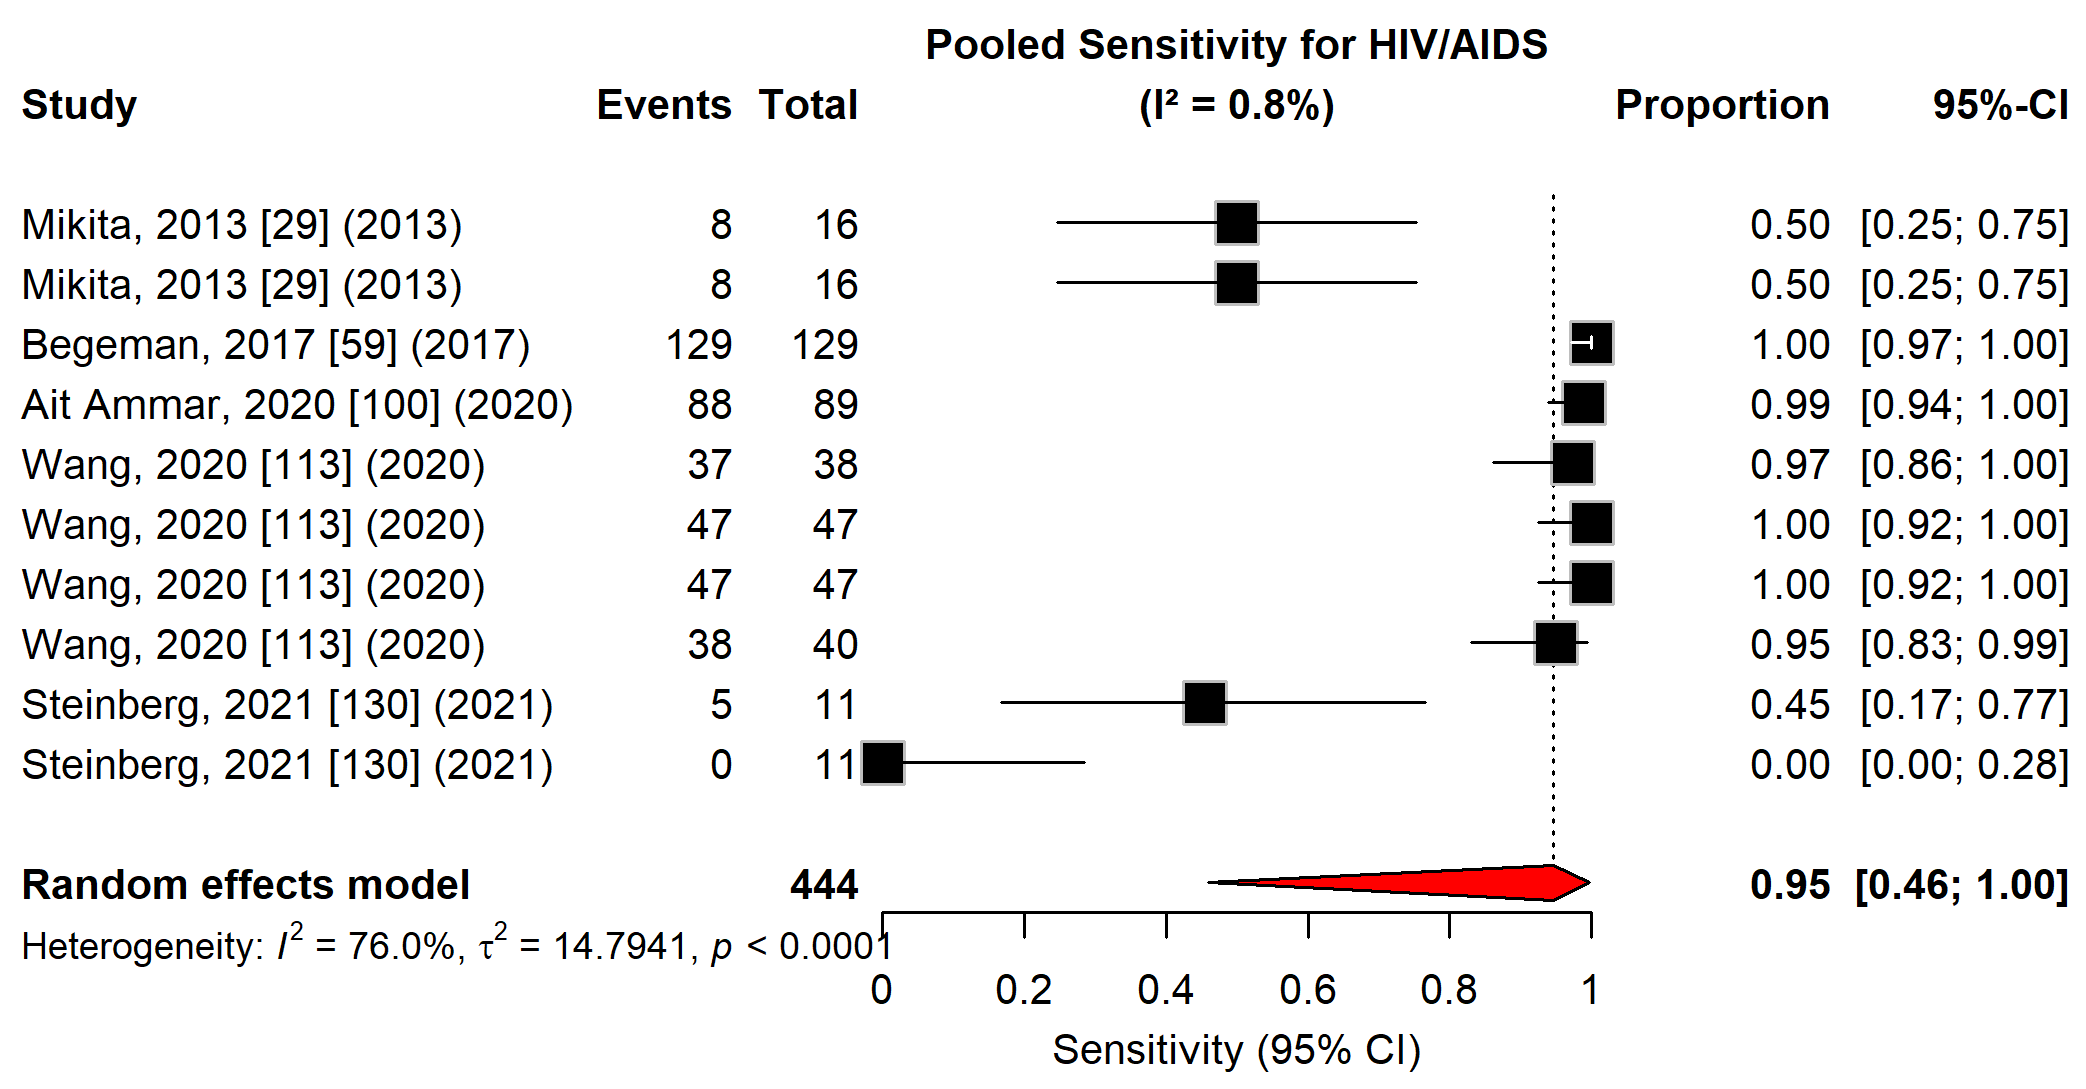


**Figure S21.** Forest plot of sensitivity for the HIV/AIDS population subgroup (k = 10). Individual study sensitivity estimates with 95% confidence intervals are shown, illustrating variability in sensitivity across HIV/AIDS evaluations.


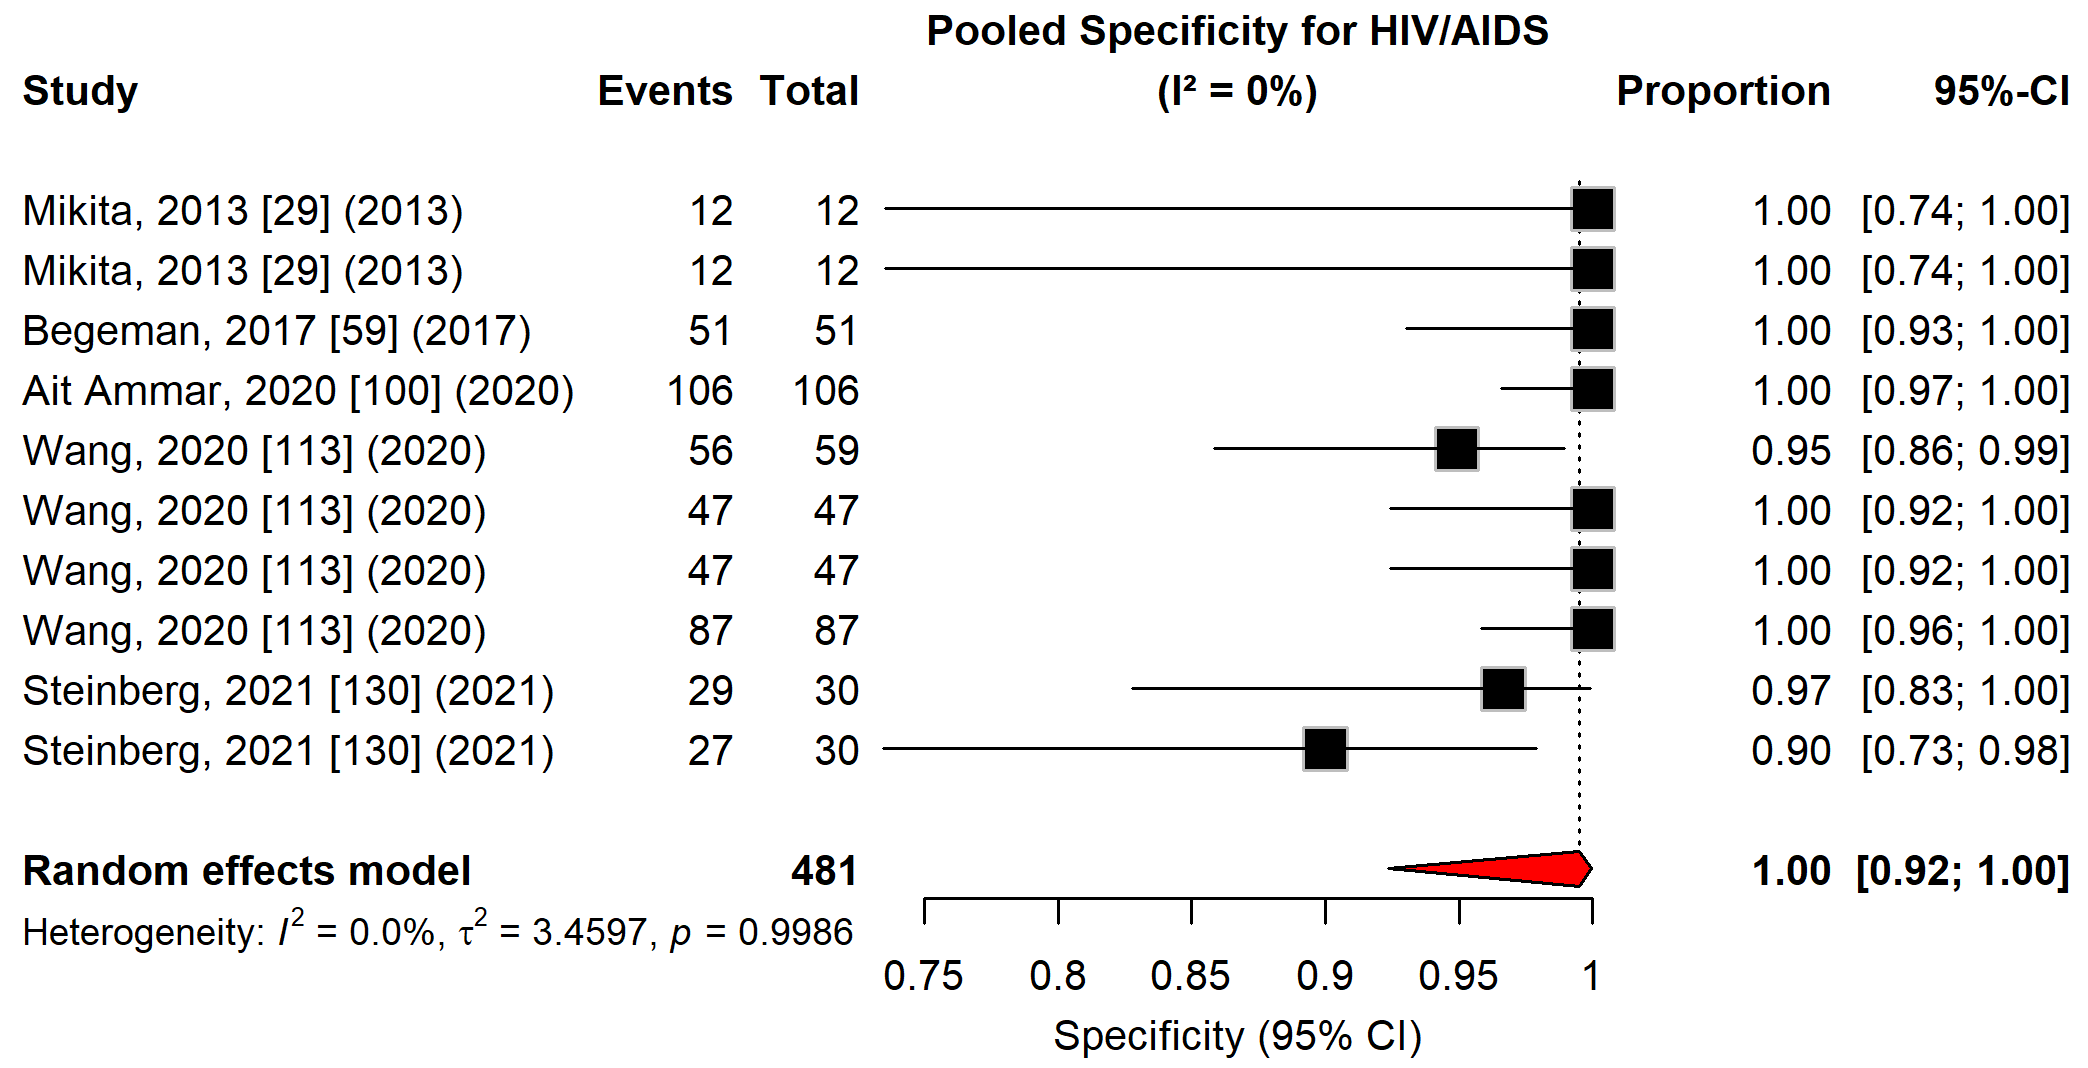


**Figure S22.** Forest plot of specificity for the HIV/AIDS population subgroup (k = 10). Individual study specificity estimates with 95% confidence intervals are shown, illustrating between-study variability within HIV/AIDS evaluations.


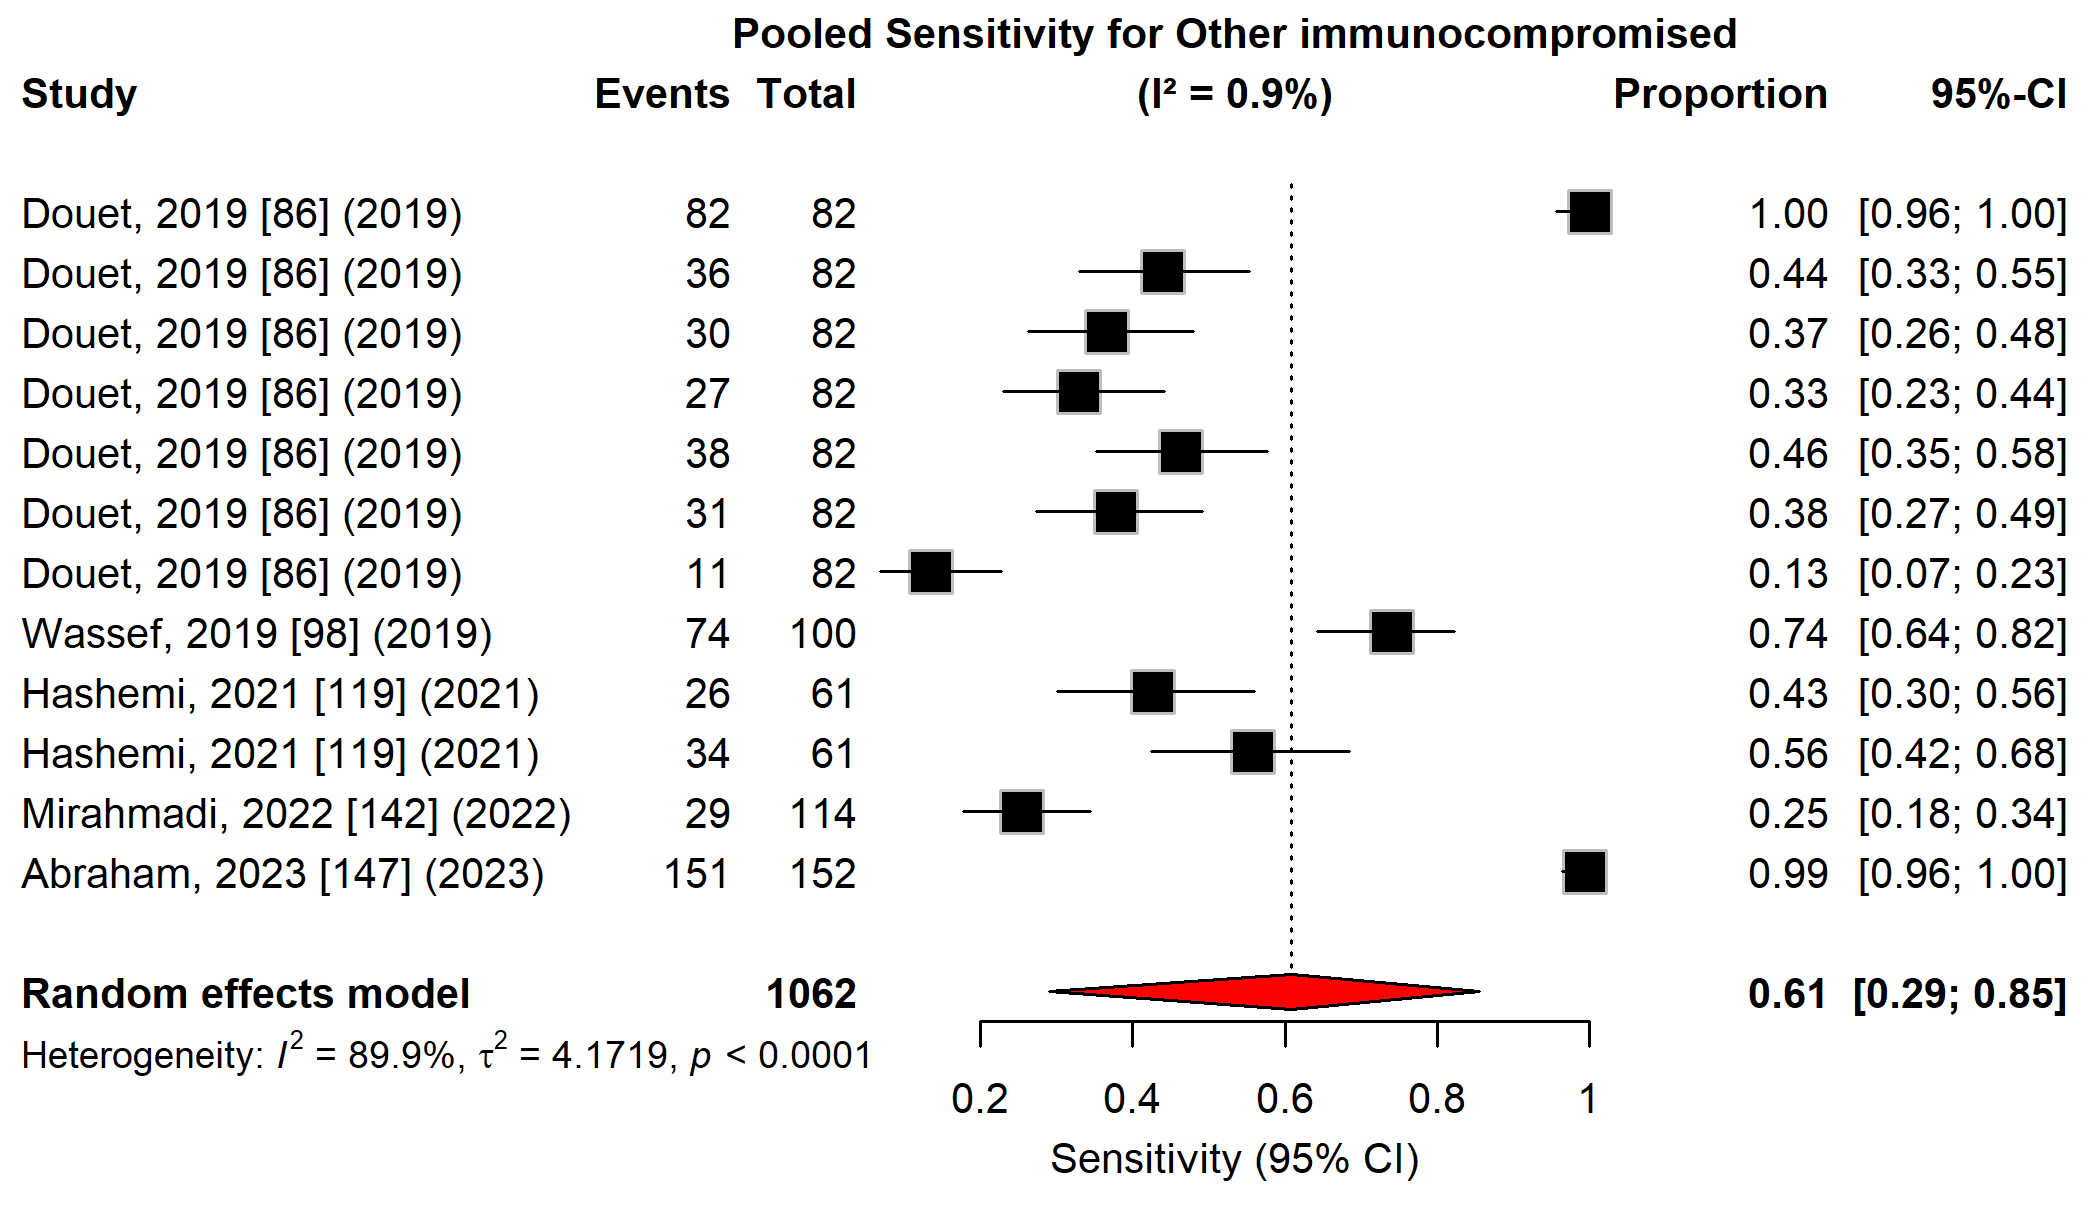


**Figure S23.** Forest plot of sensitivity for the other immunocompromised population subgroup (k = 12). Individual study sensitivity estimates with 95% confidence intervals are shown, highlighting reduced sensitivity and between-study variability in immunocompromised populations.


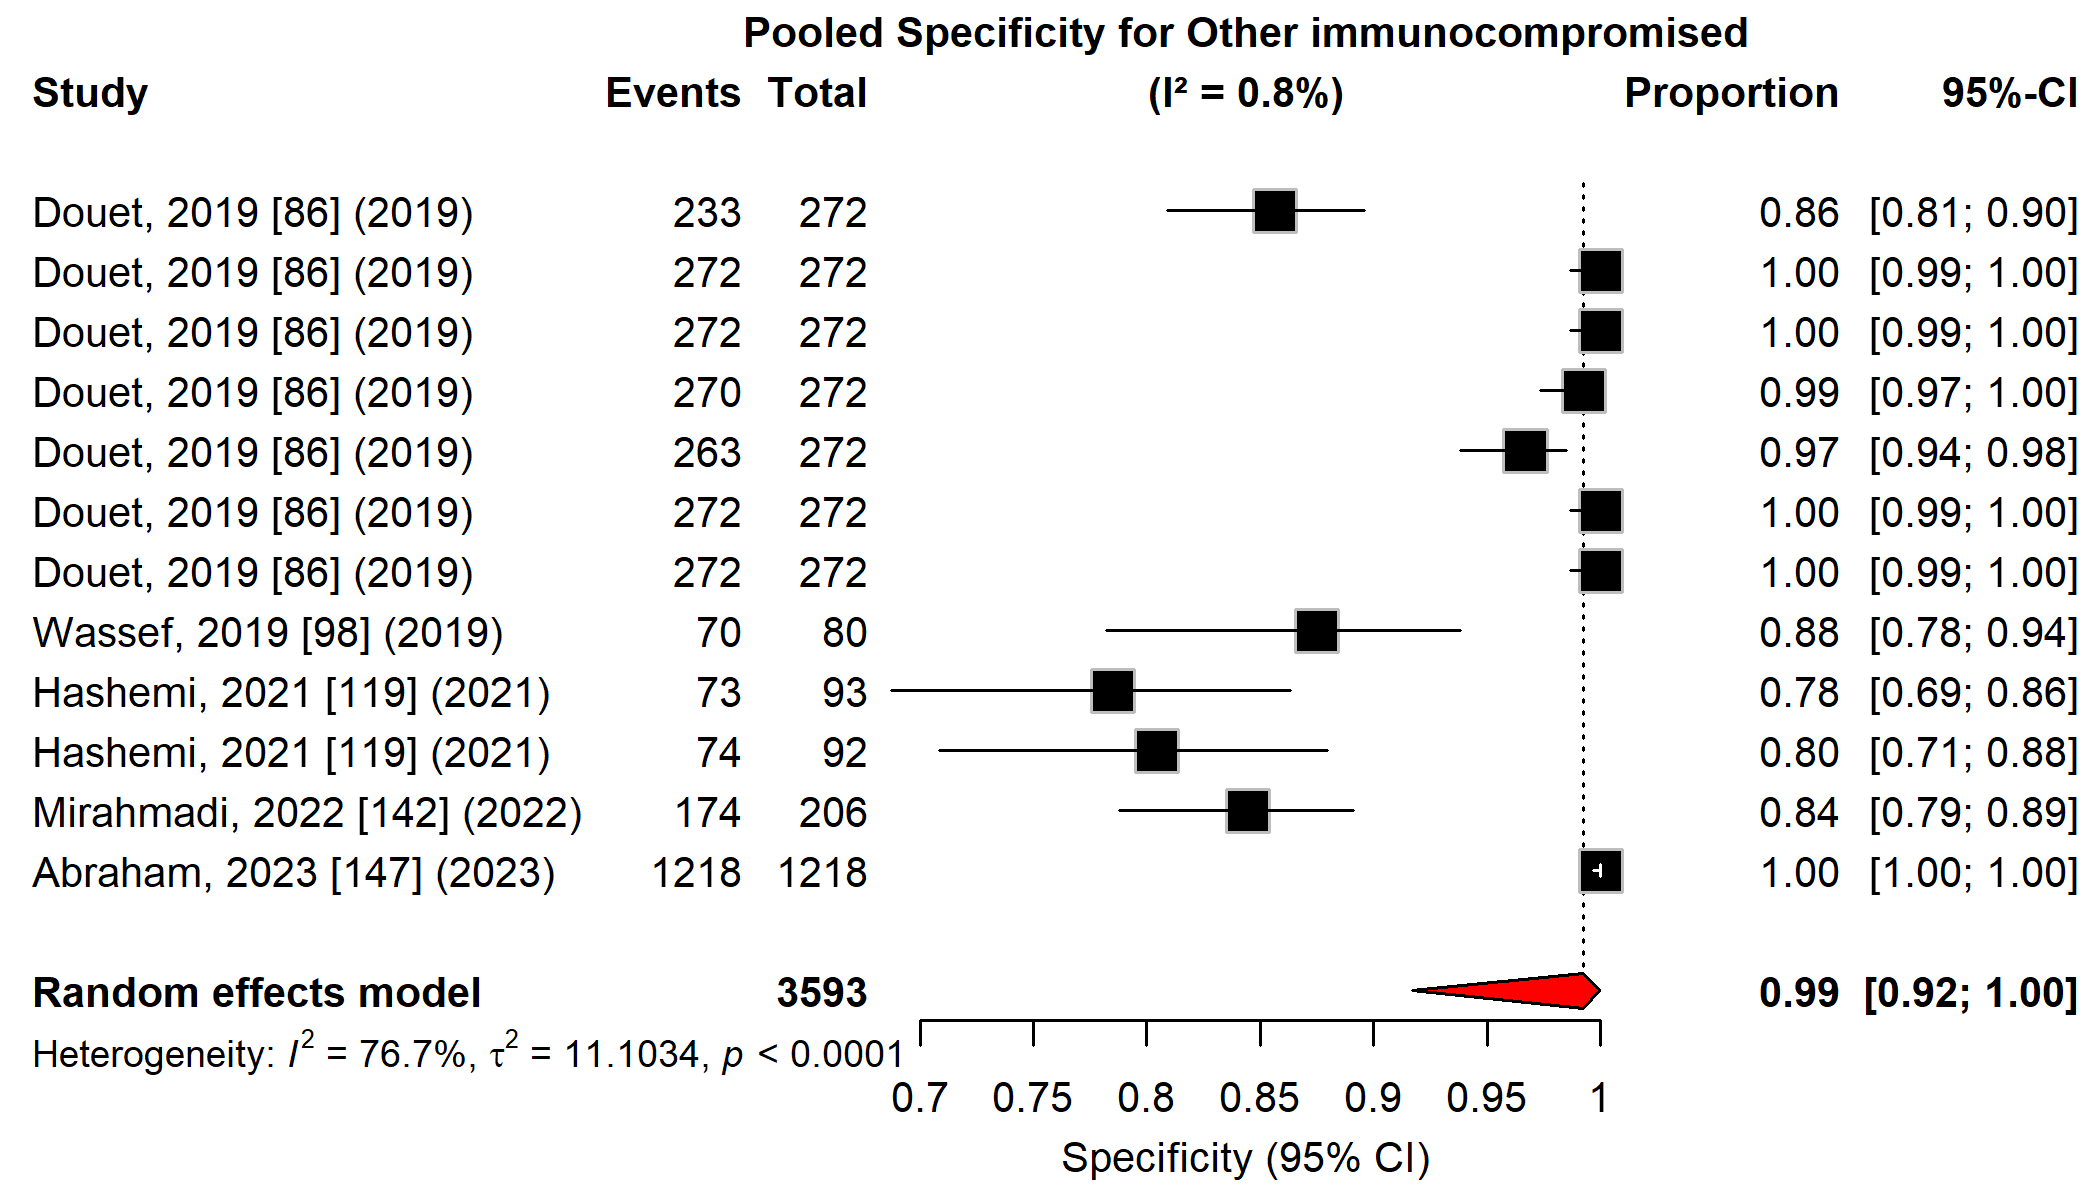


**Figure S24.** Forest plot of specificity for the other immunocompromised population subgroup (k = 12). Individual study specificity estimates with 95% confidence intervals are shown, illustrating variability in specificity within this subgroup.


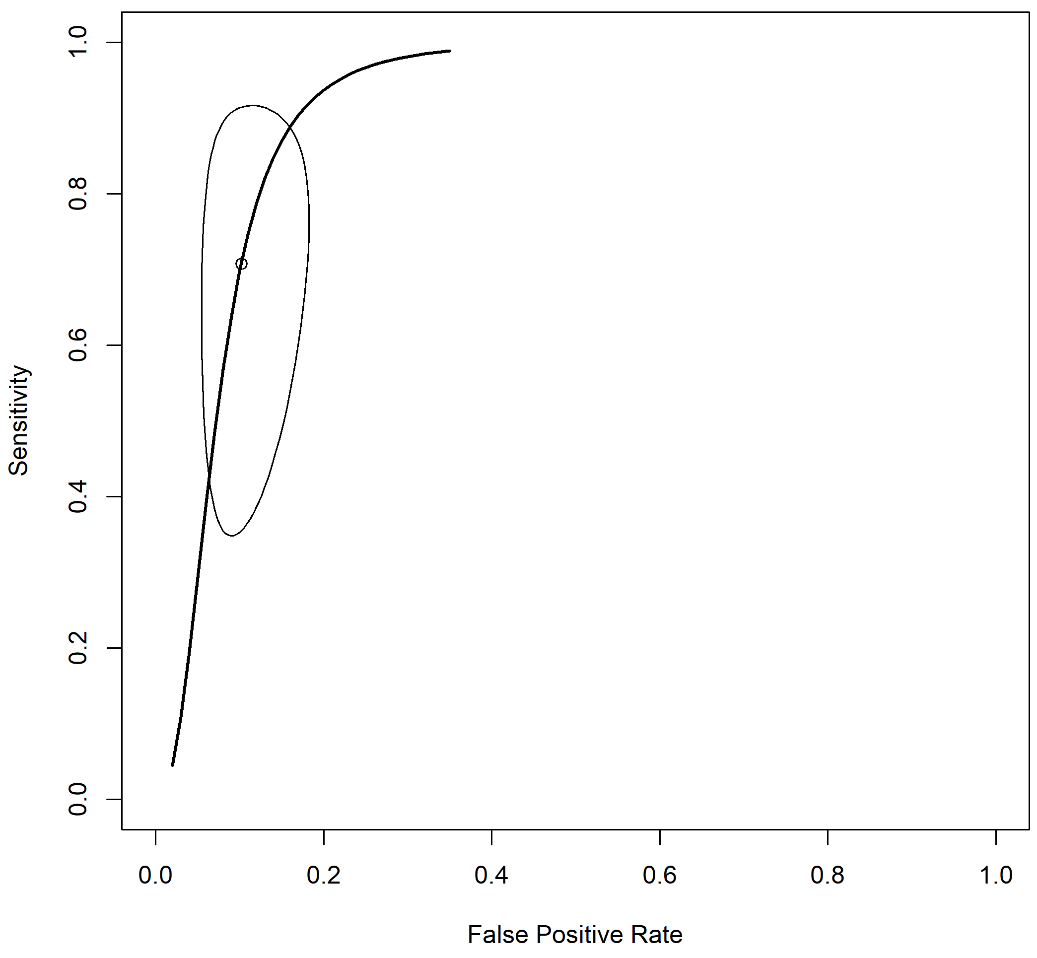


**Figure S25.** Summary ROC (SROC) plot for the ocular toxoplasmosis/ophthalmology population subgroup (Reitsma; n = 12 evaluations). Study operating points are shown in ROC space alongside the pooled summary estimate and confidence region, highlighting variability in sensitivity and specificity across ocular-focused evaluations.


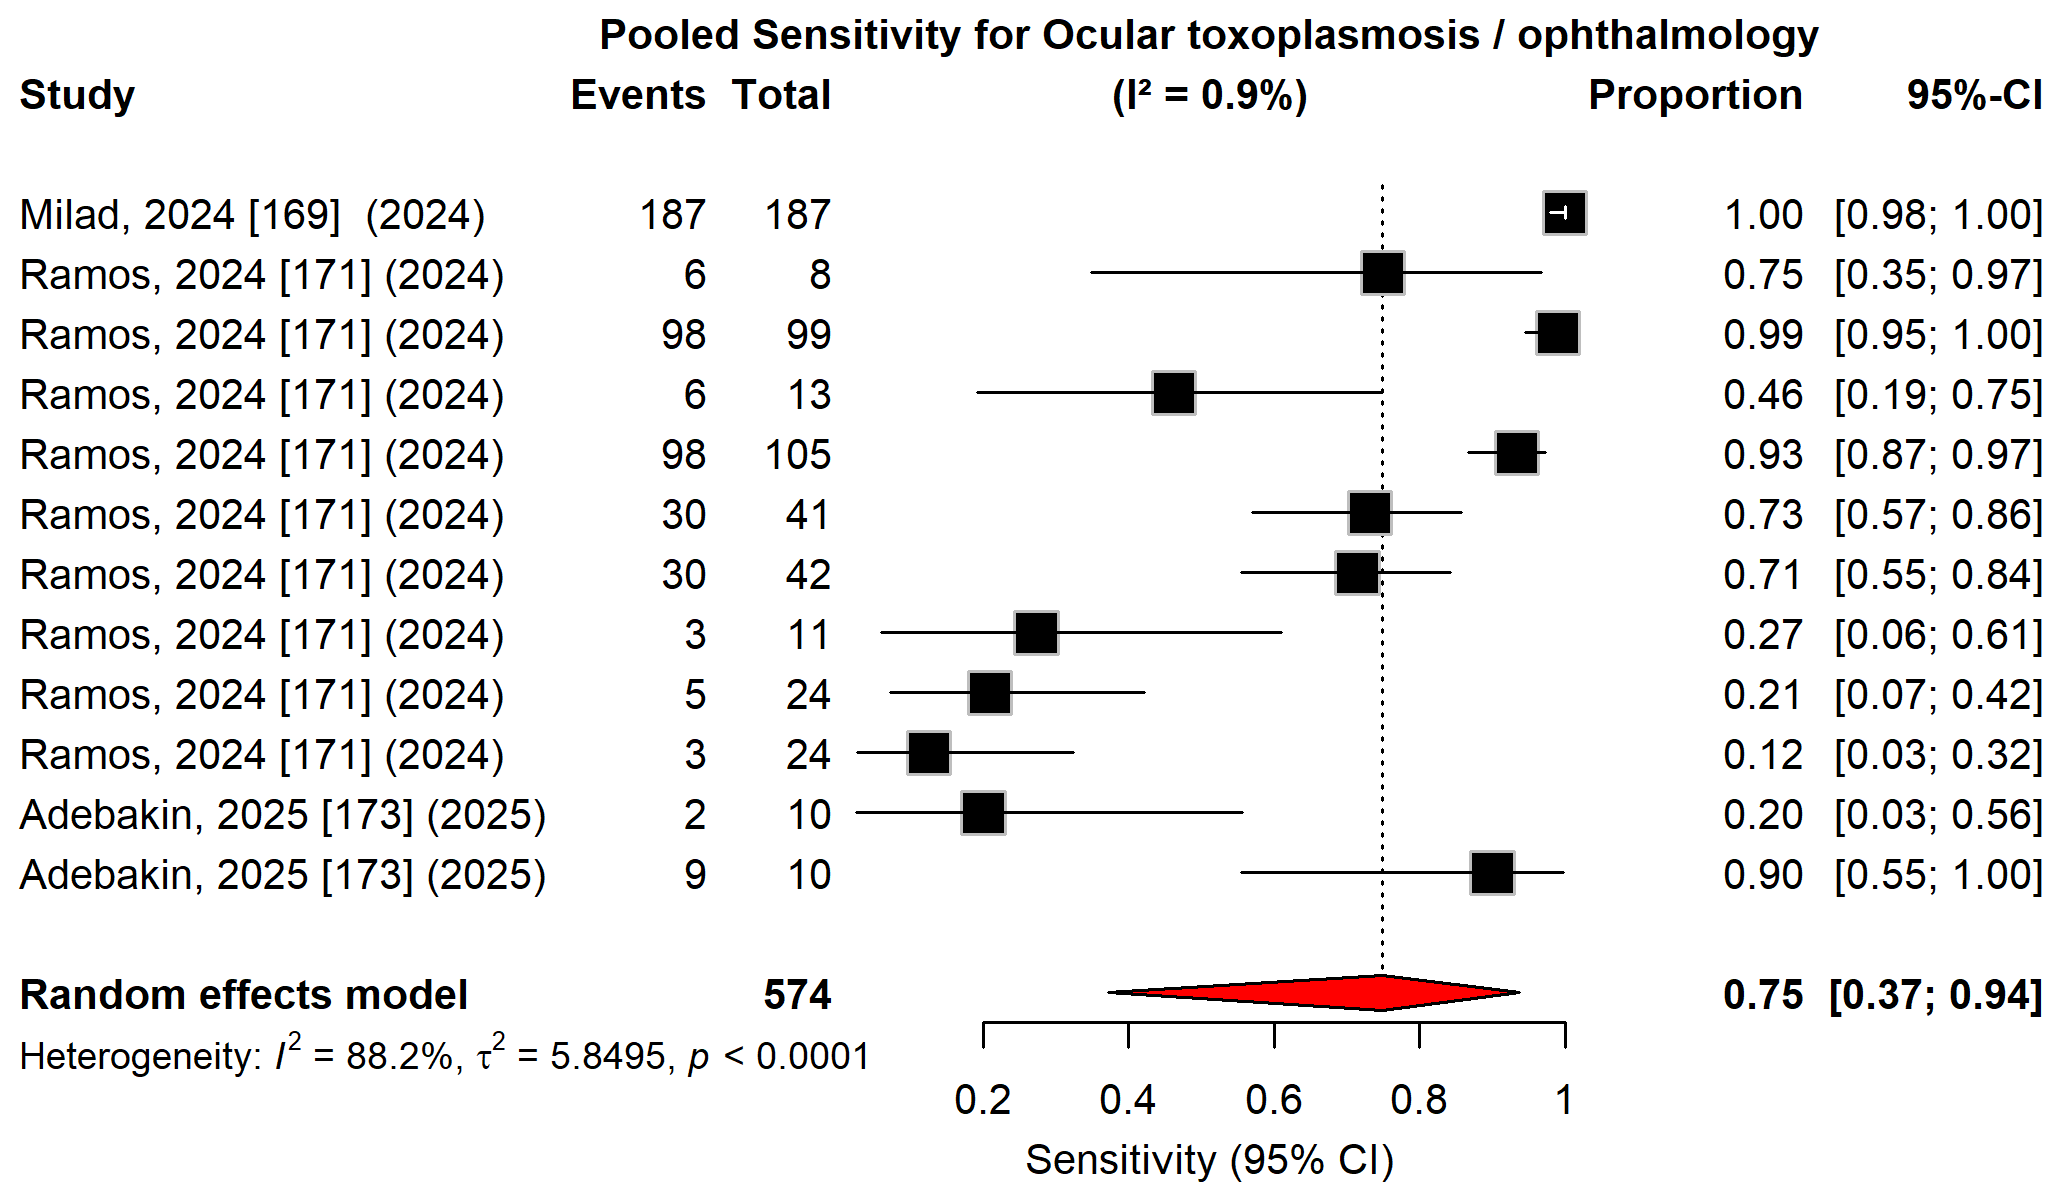


**Figure S26.** Forest plot of sensitivity for the ocular toxoplasmosis/ophthalmology population subgroup (k = 12). Individual study sensitivity estimates with 95% confidence intervals are shown, highlighting variability in sensitivity across ocular-focused evaluations.


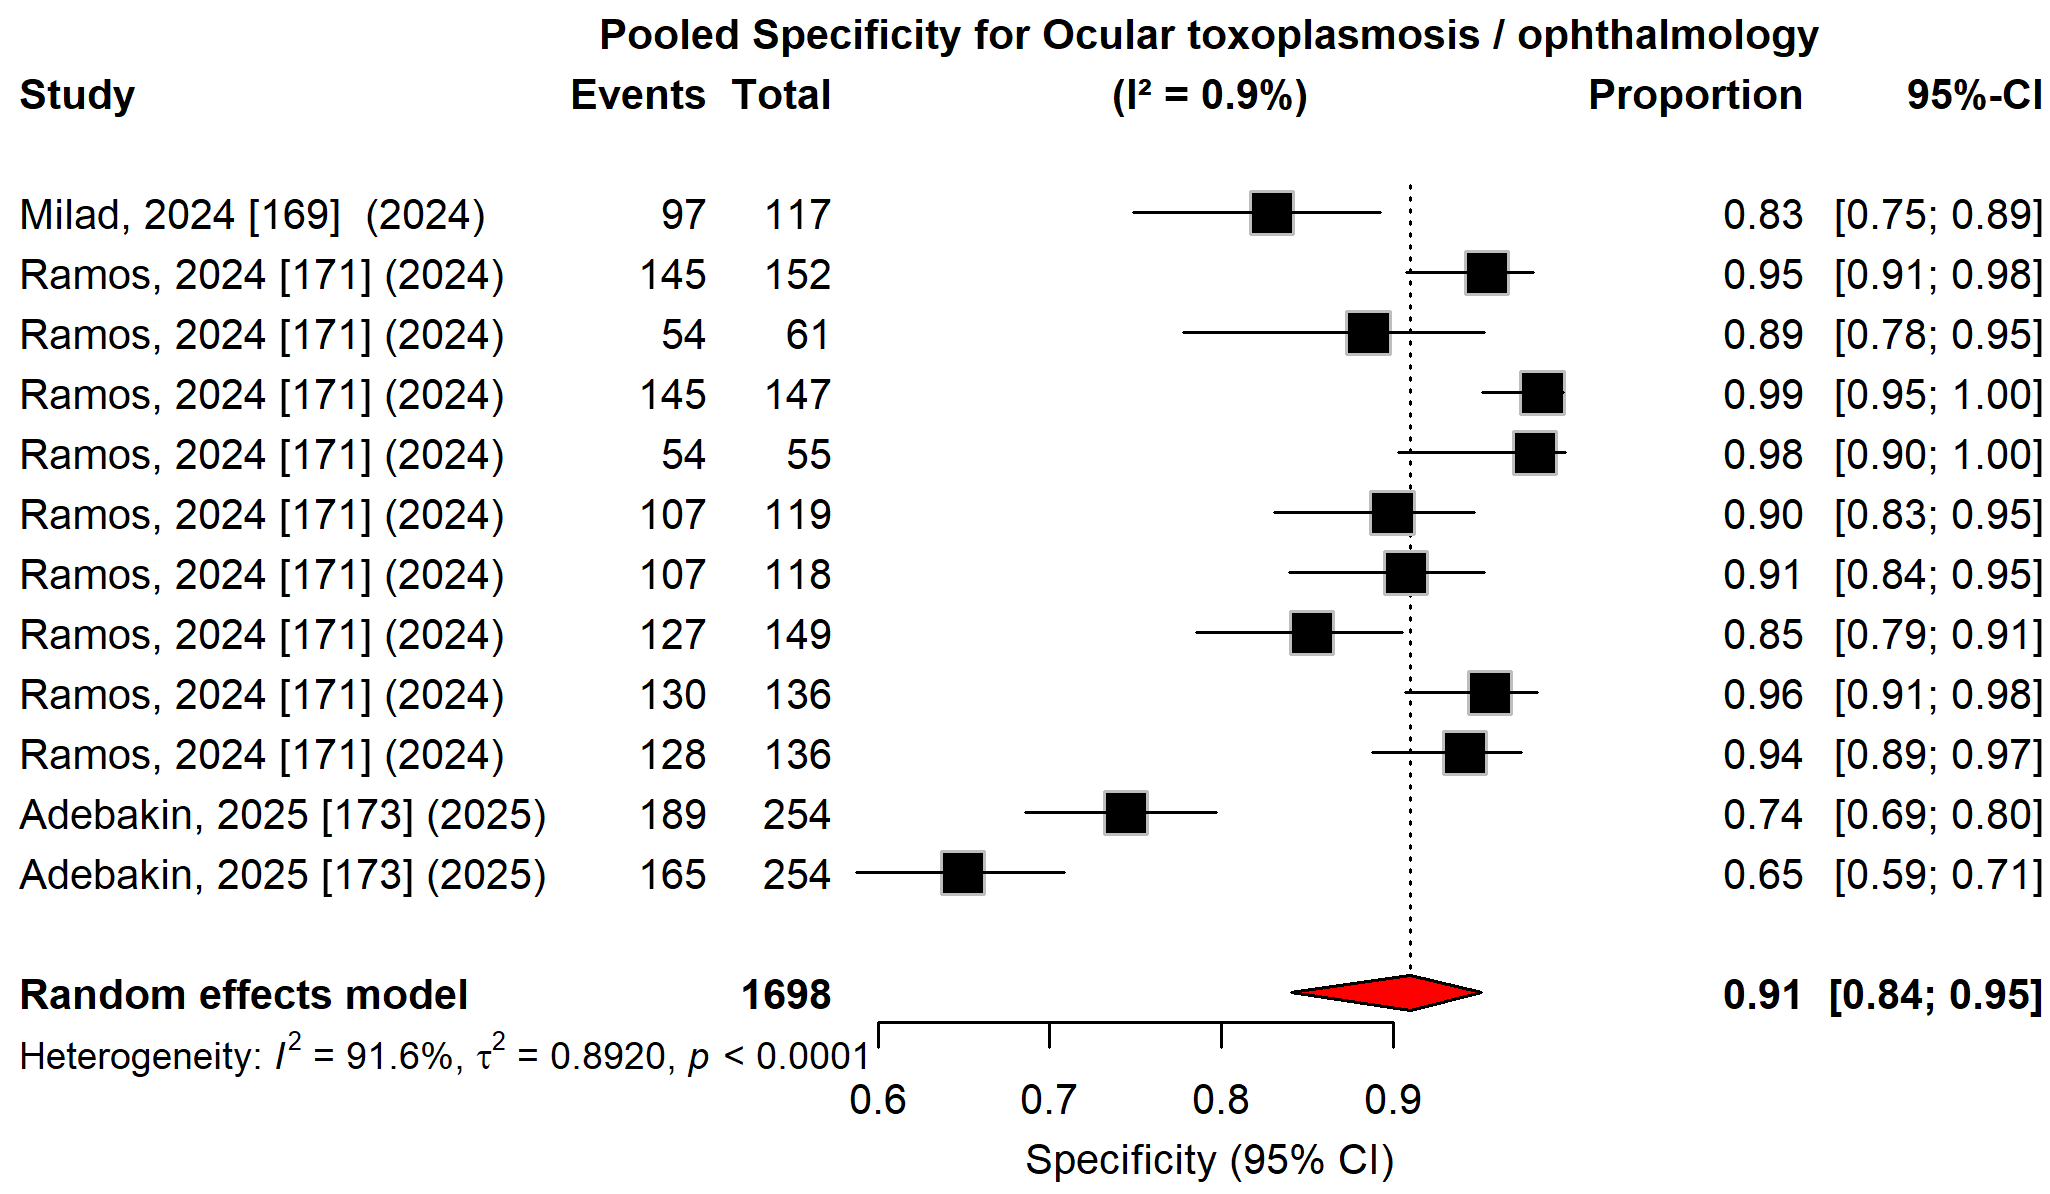


**Figure S27.** Forest plot of specificity for the ocular toxoplasmosis/ophthalmology population subgroup (k = 12). Individual study specificity estimates with 95% confidence intervals are shown, illustrating between-study variability within ocular-focused evaluations.


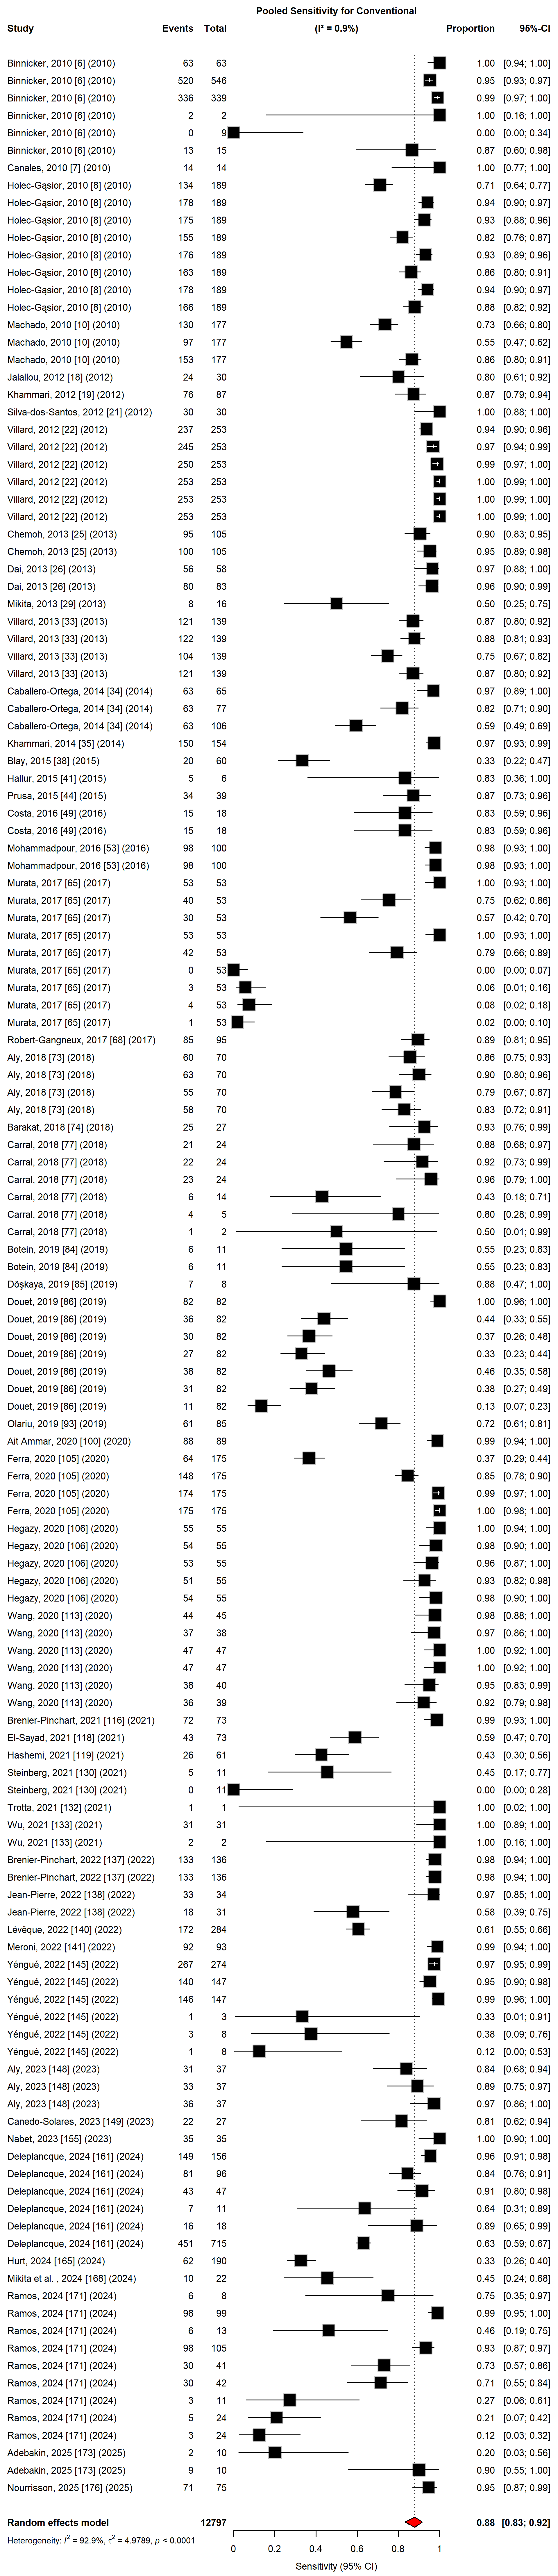


**Figure S28.** Forest plot of sensitivity for Conventional laboratory-based evaluations (k = 140). Individual study estimates with 95% confidence intervals are displayed, highlighting between-study heterogeneity in sensitivity across conventional platforms.


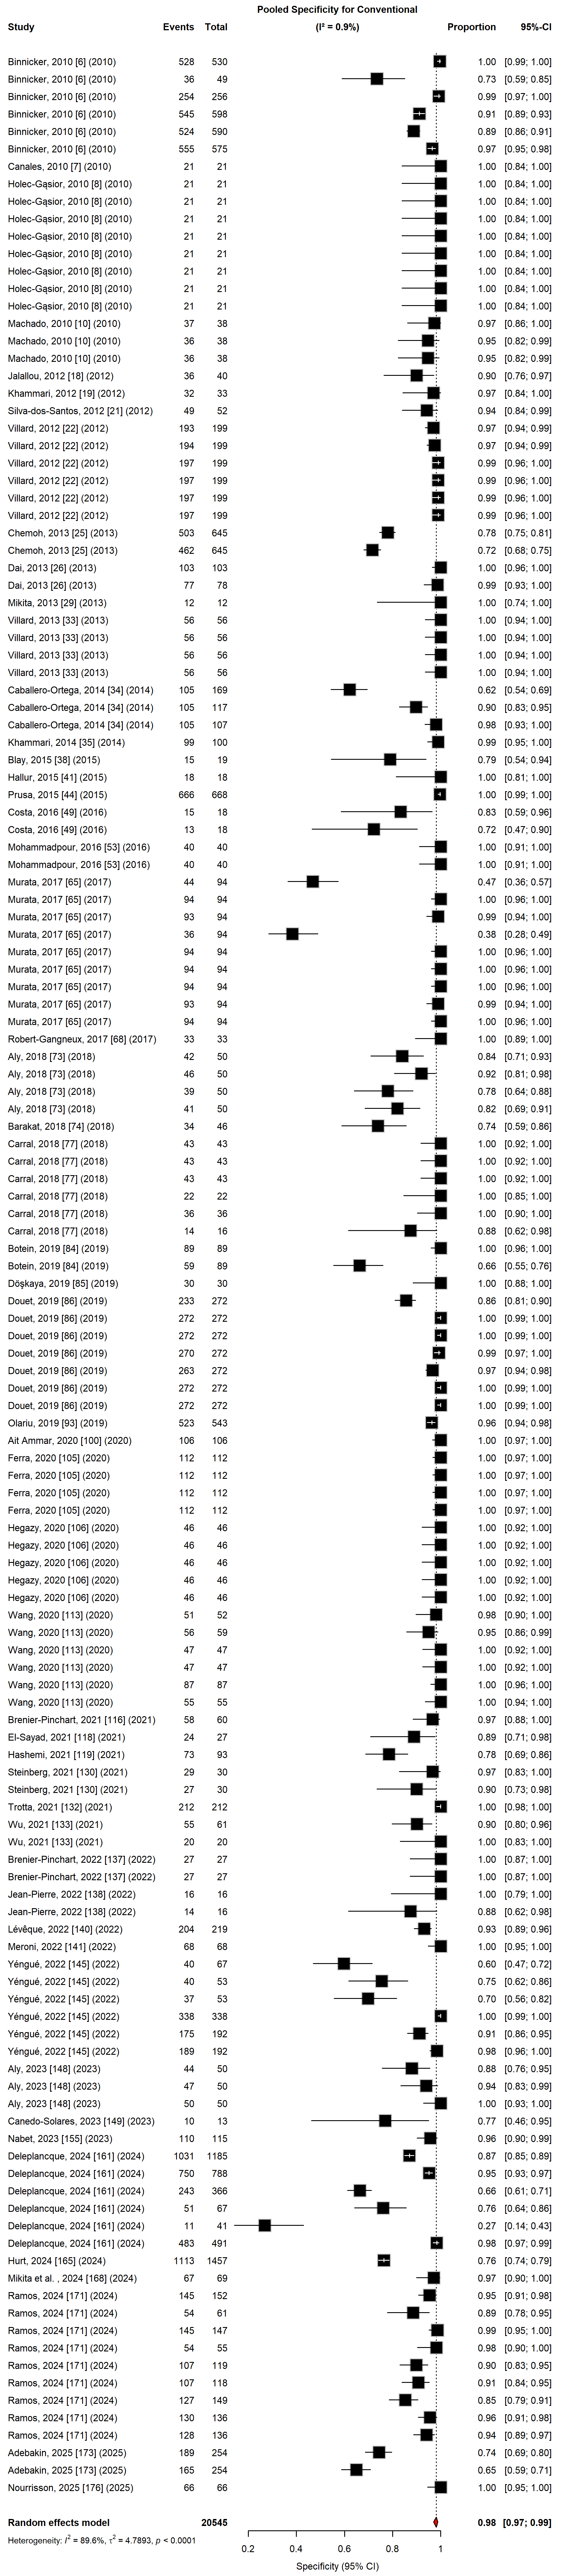


**Figure S29.** Forest plot of specificity for Conventional laboratory-based evaluations (k = 140). Individual study estimates with 95% confidence intervals are displayed, highlighting between-study heterogeneity in specificity across conventional platforms.


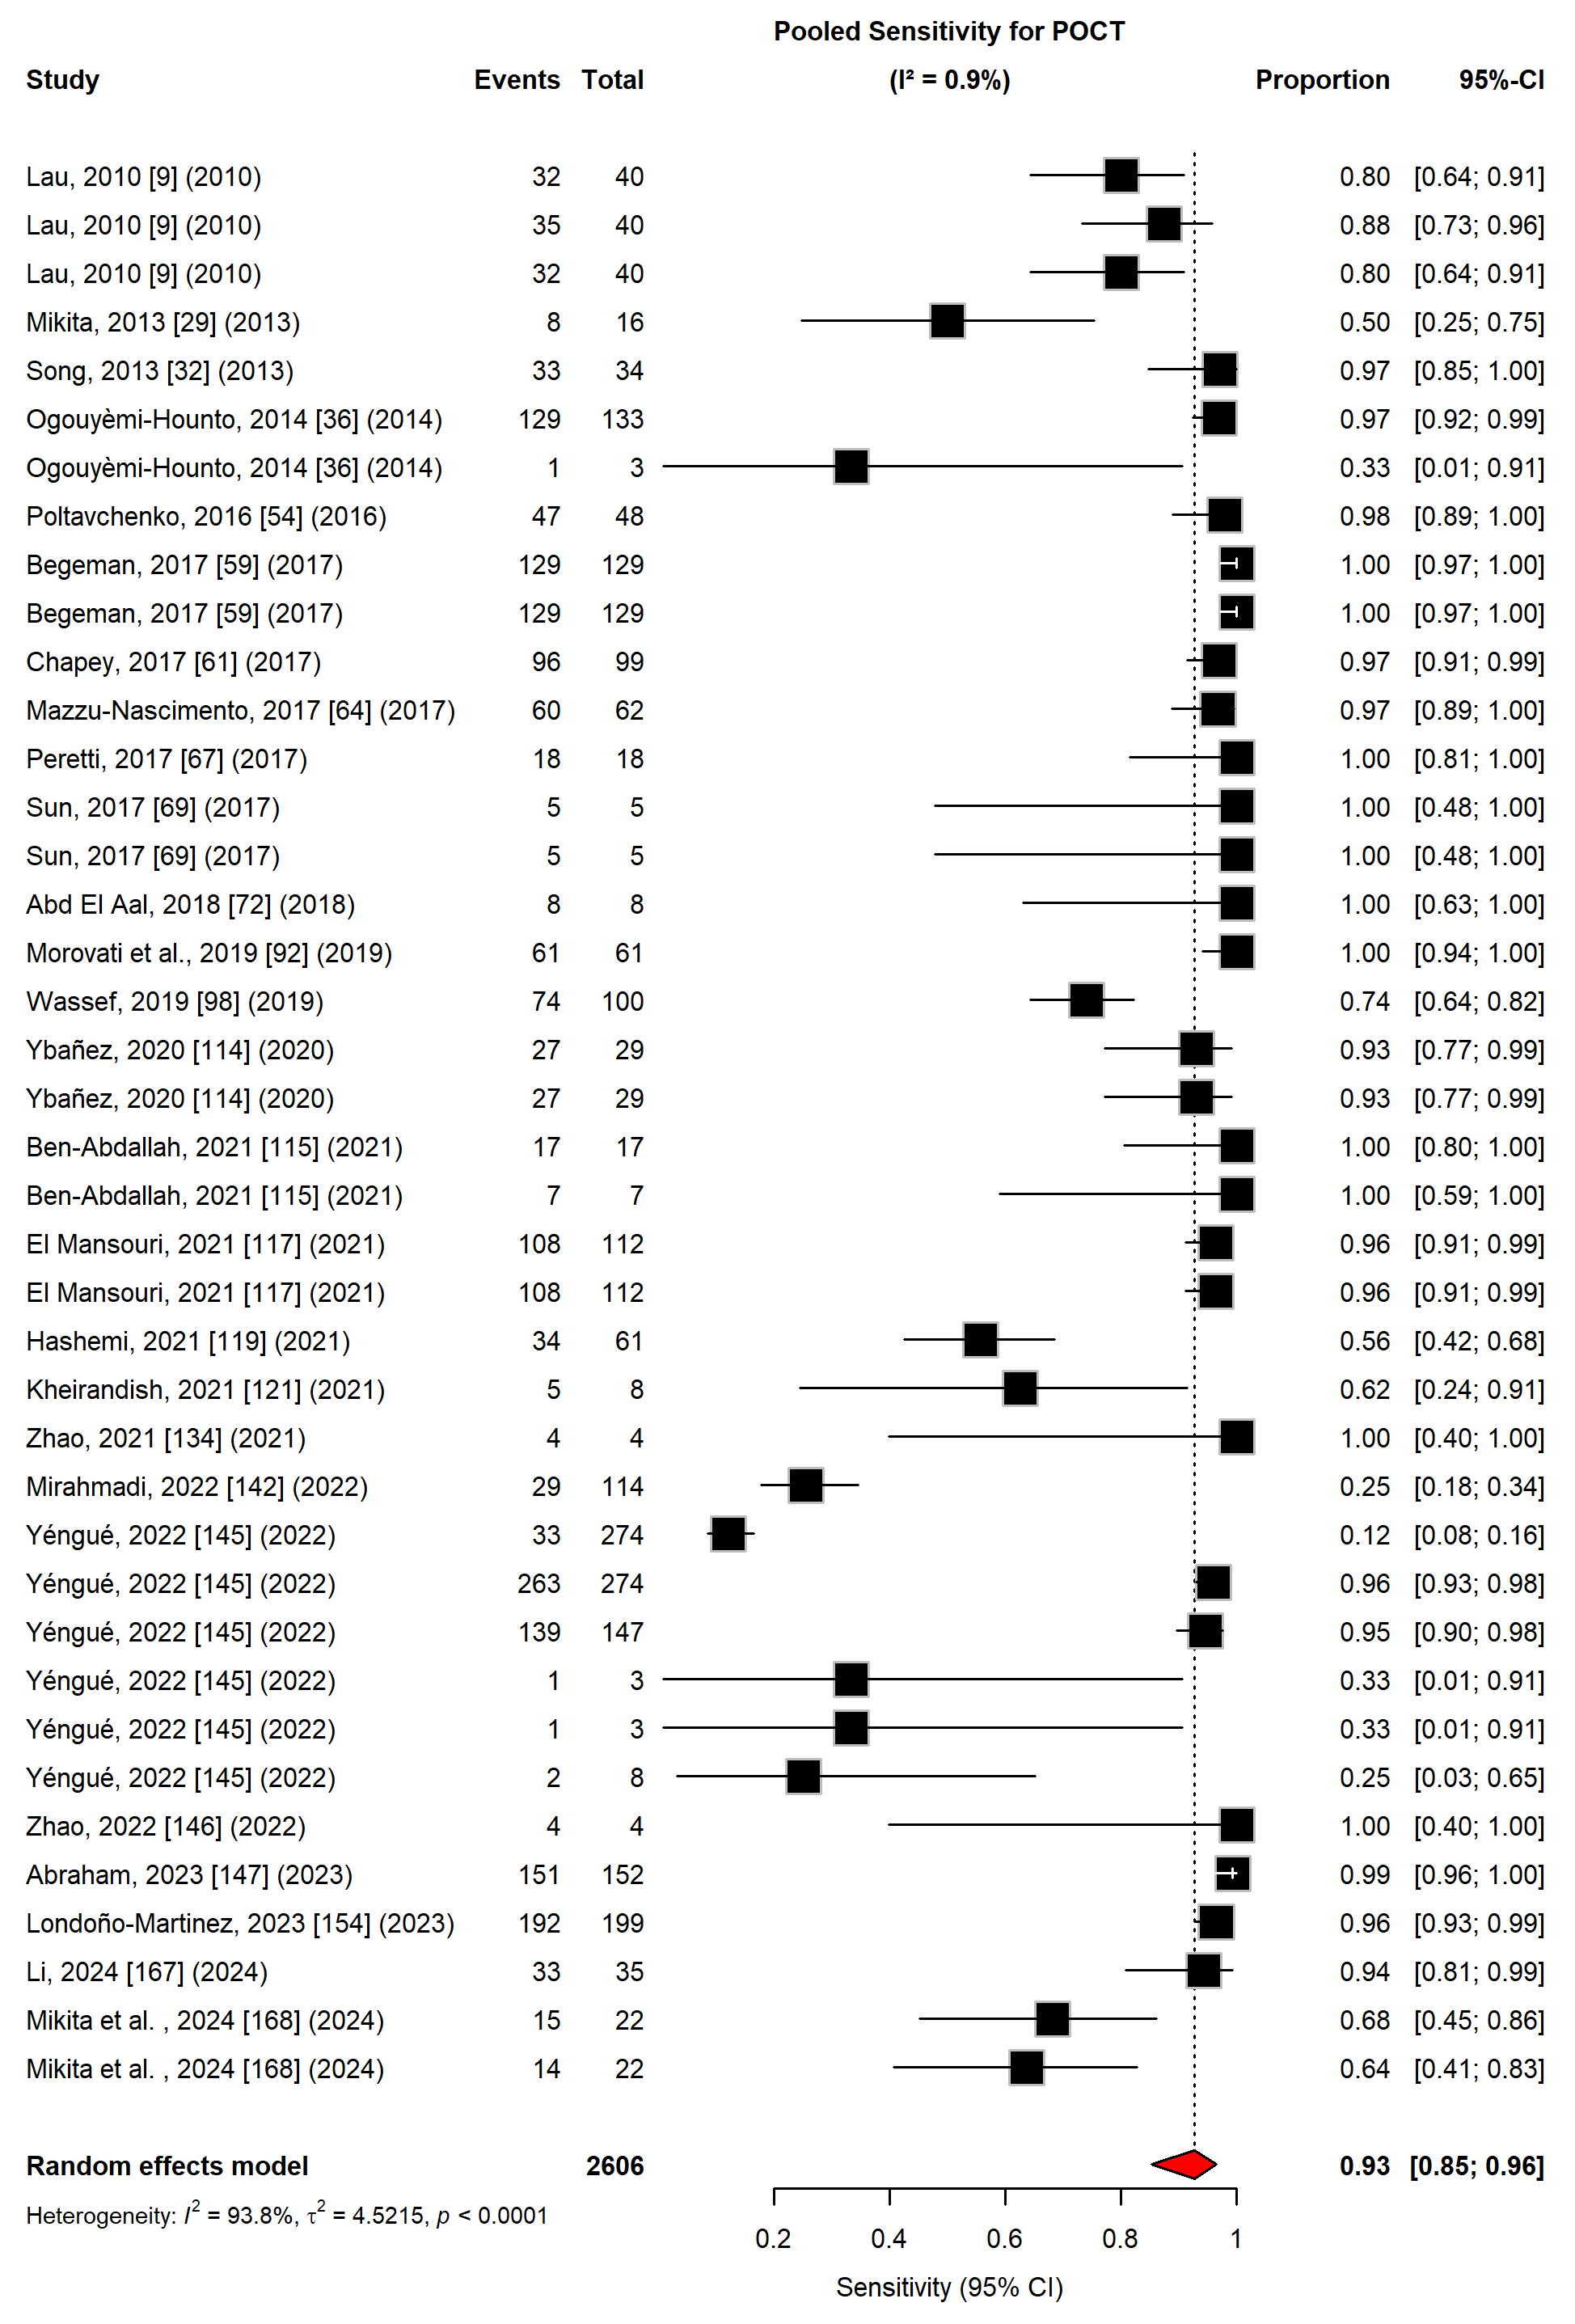


**Figure S30.** Forest plot of sensitivity for POCT evaluations (k = 40). Individual study estimates with 95% confidence intervals are shown, illustrating between-study variability in sensitivity within point-of-care testing platforms.


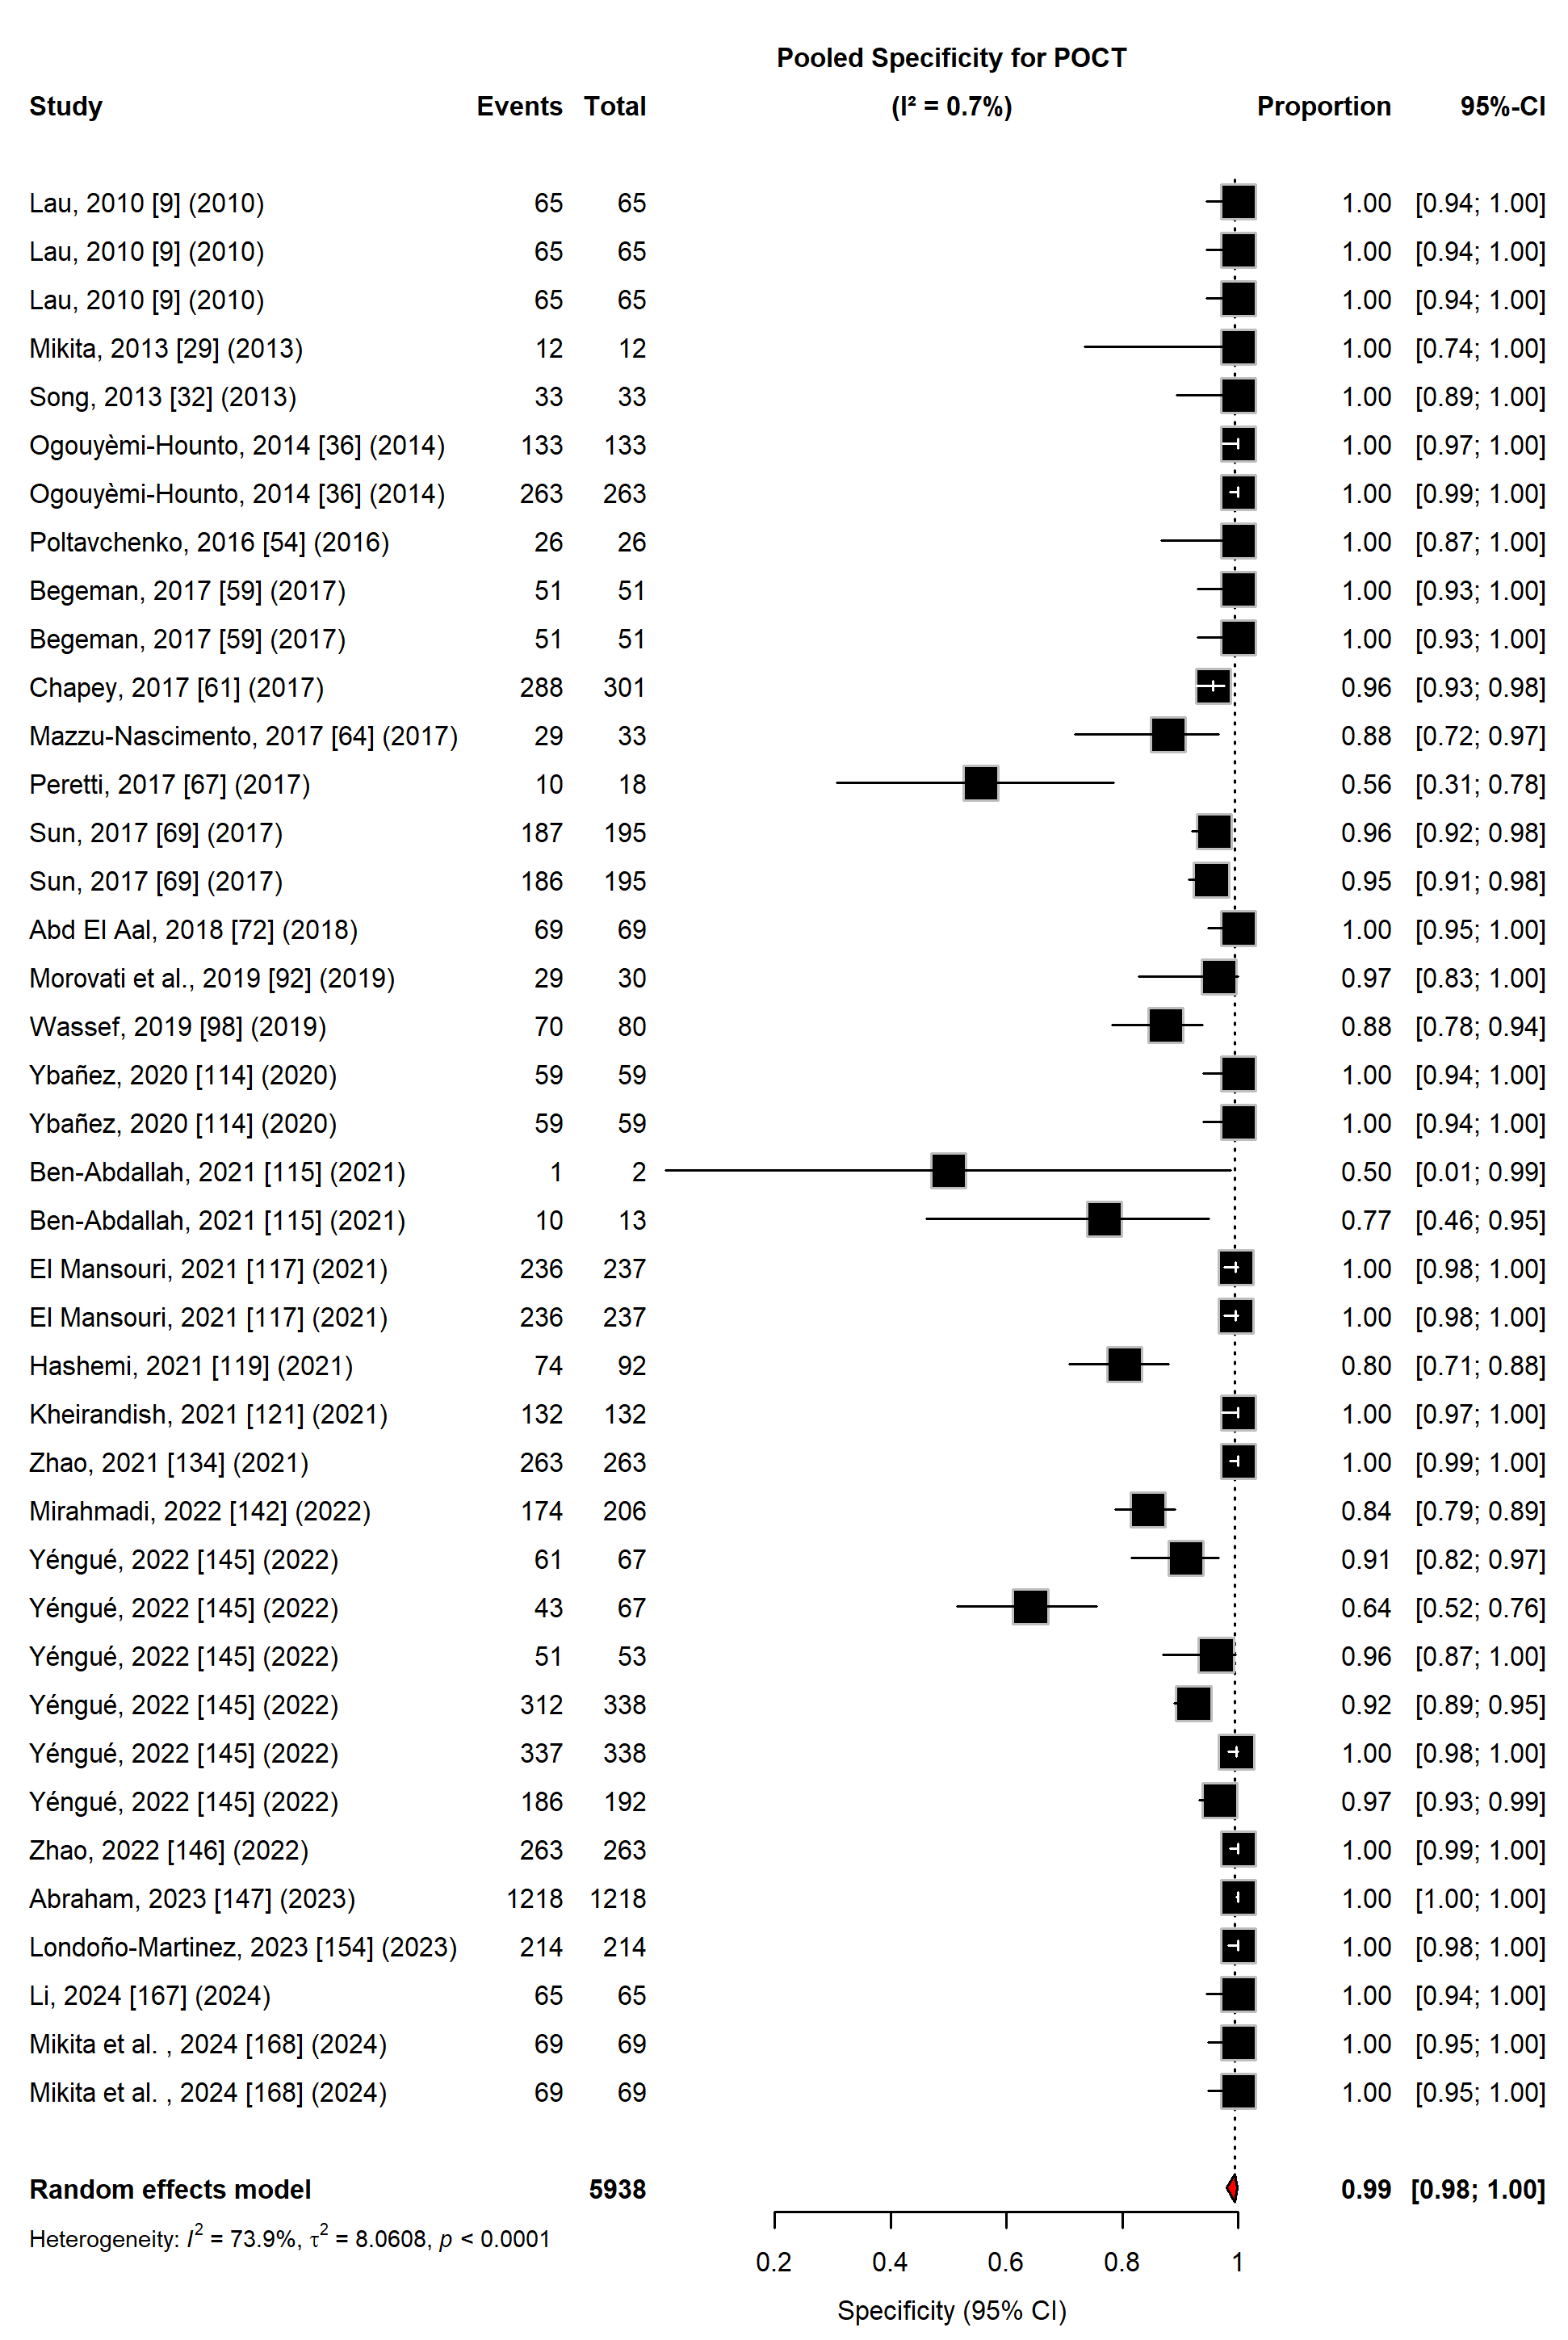


**Figure S31.** Forest plot of specificity for POCT evaluations (k = 40). Individual study estimates with 95% confidence intervals are shown, illustrating between-study variability in specificity within point-of-care testing platforms.


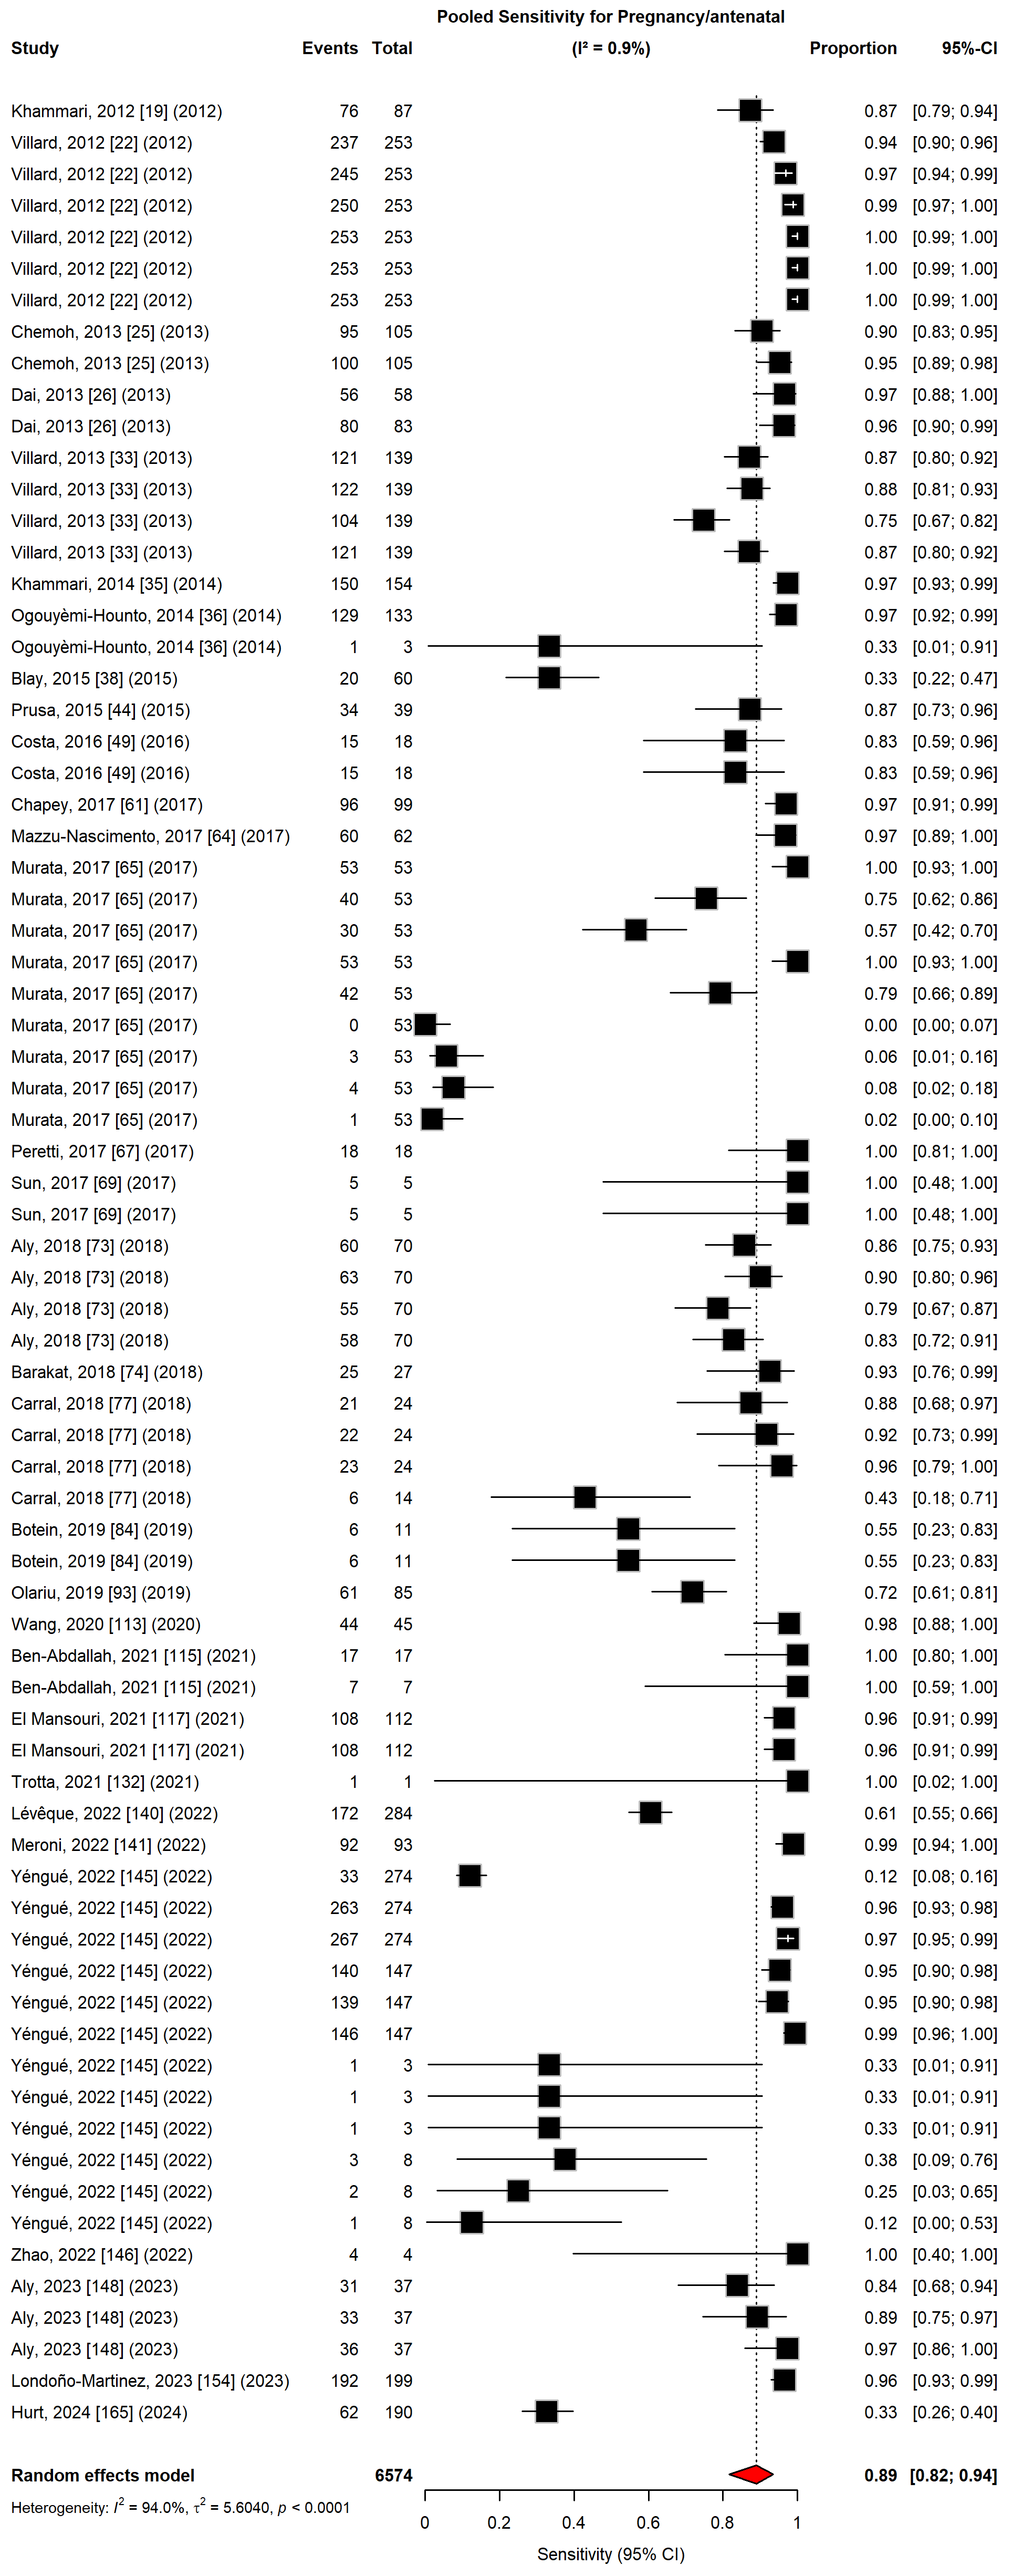


**Figure S32.** Forest plot of sensitivity for the pregnancy/antenatal population subgroup (k = 74). Individual study sensitivity estimates with 95% confidence intervals are shown, illustrating between-study variability within pregnancy/antenatal evaluations.


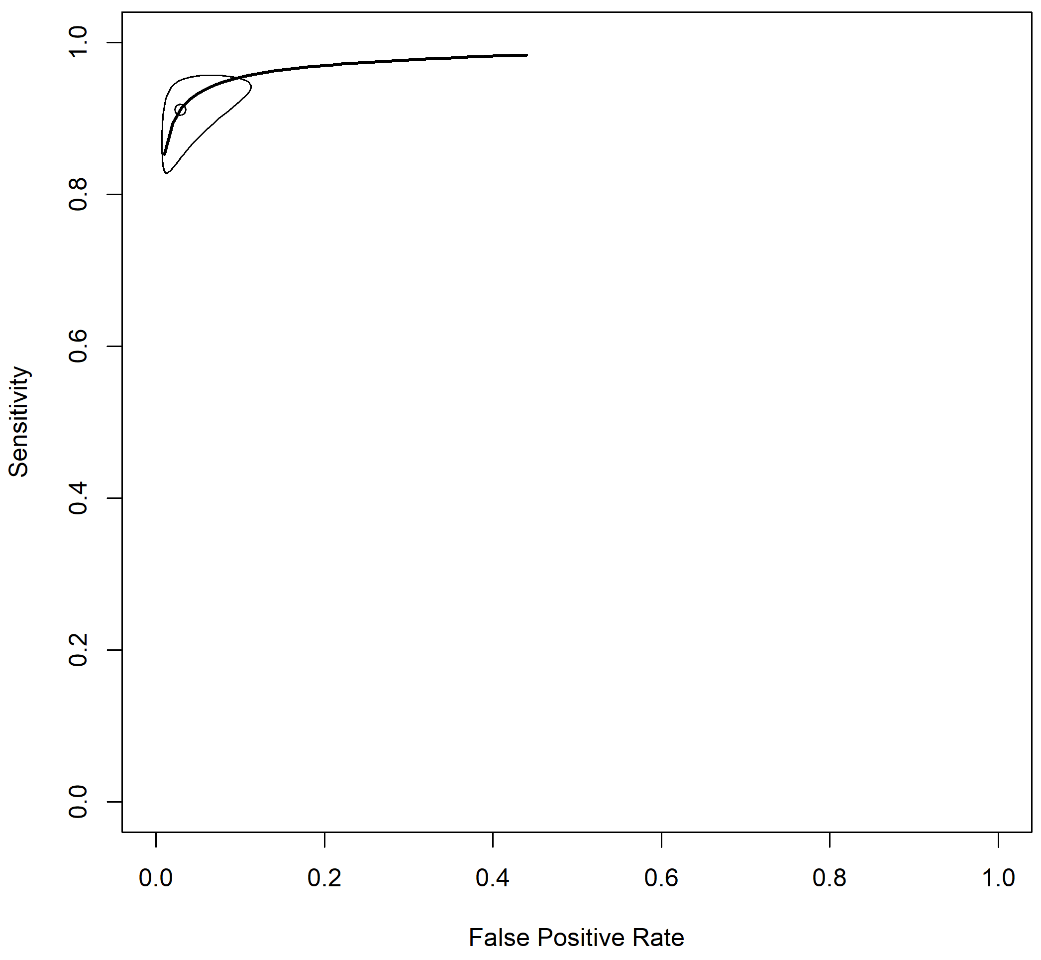


**Figure S33.** Summary ROC (SROC) plot for the IgG avidity detection target subgroup (Reitsma; n = 10 evaluations). Study operating points are displayed in ROC space alongside the pooled summary estimate and confidence region; interpretation should consider the limited number of evaluations.


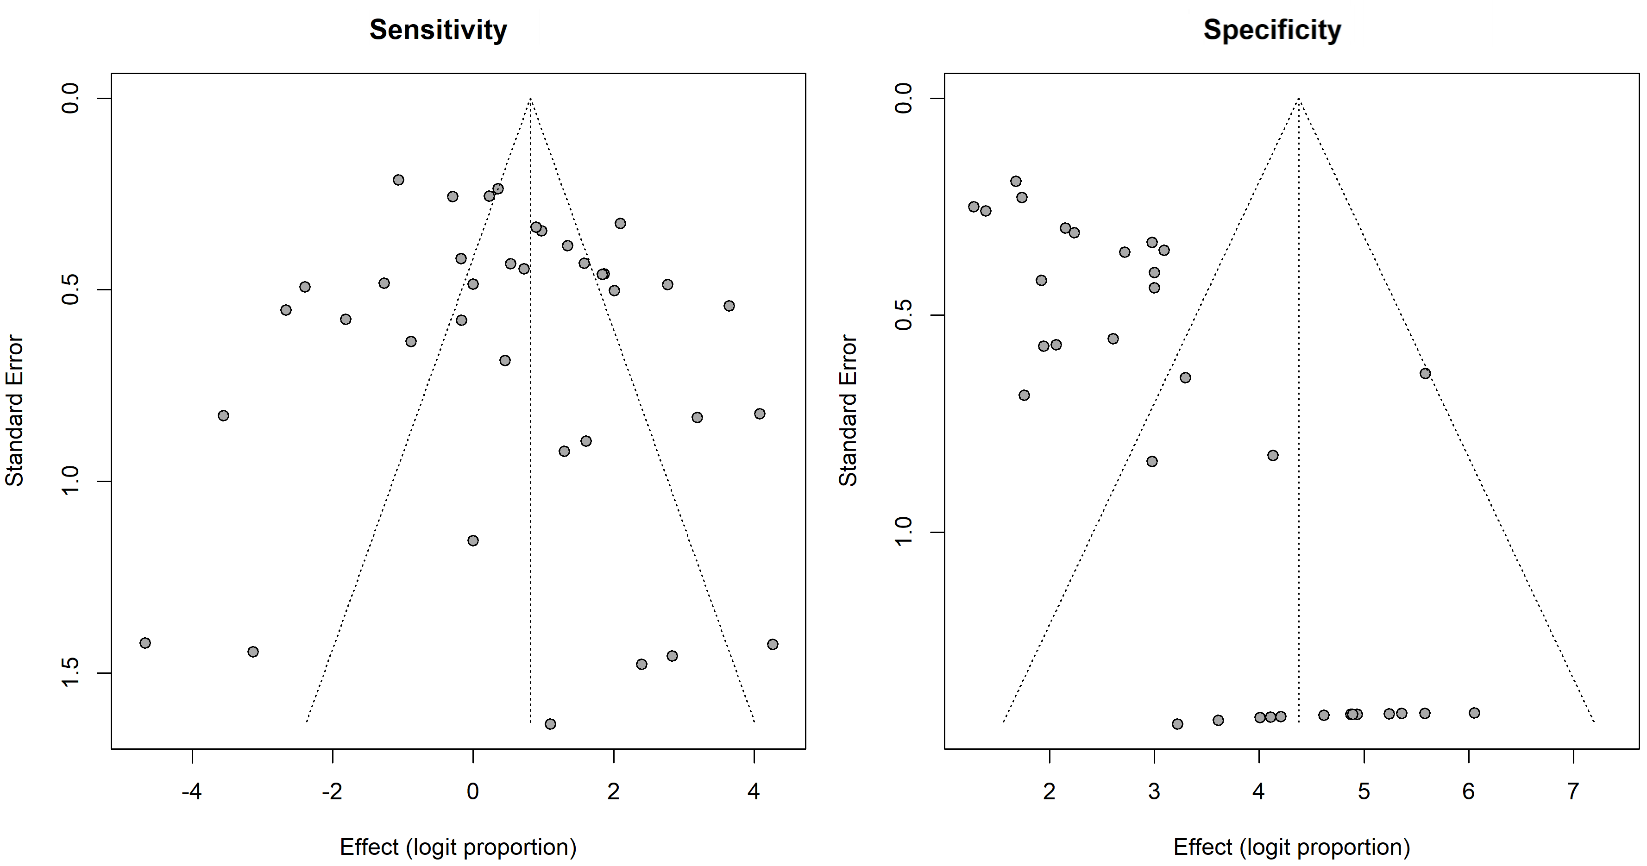


**Figure S34.** Funnel plots for DNA evaluations showing sensitivity and specificity. Plots display study-level estimates against a measure of precision to visually assess small-study effects and potential publication bias within the DNA subgroup (k = 41).


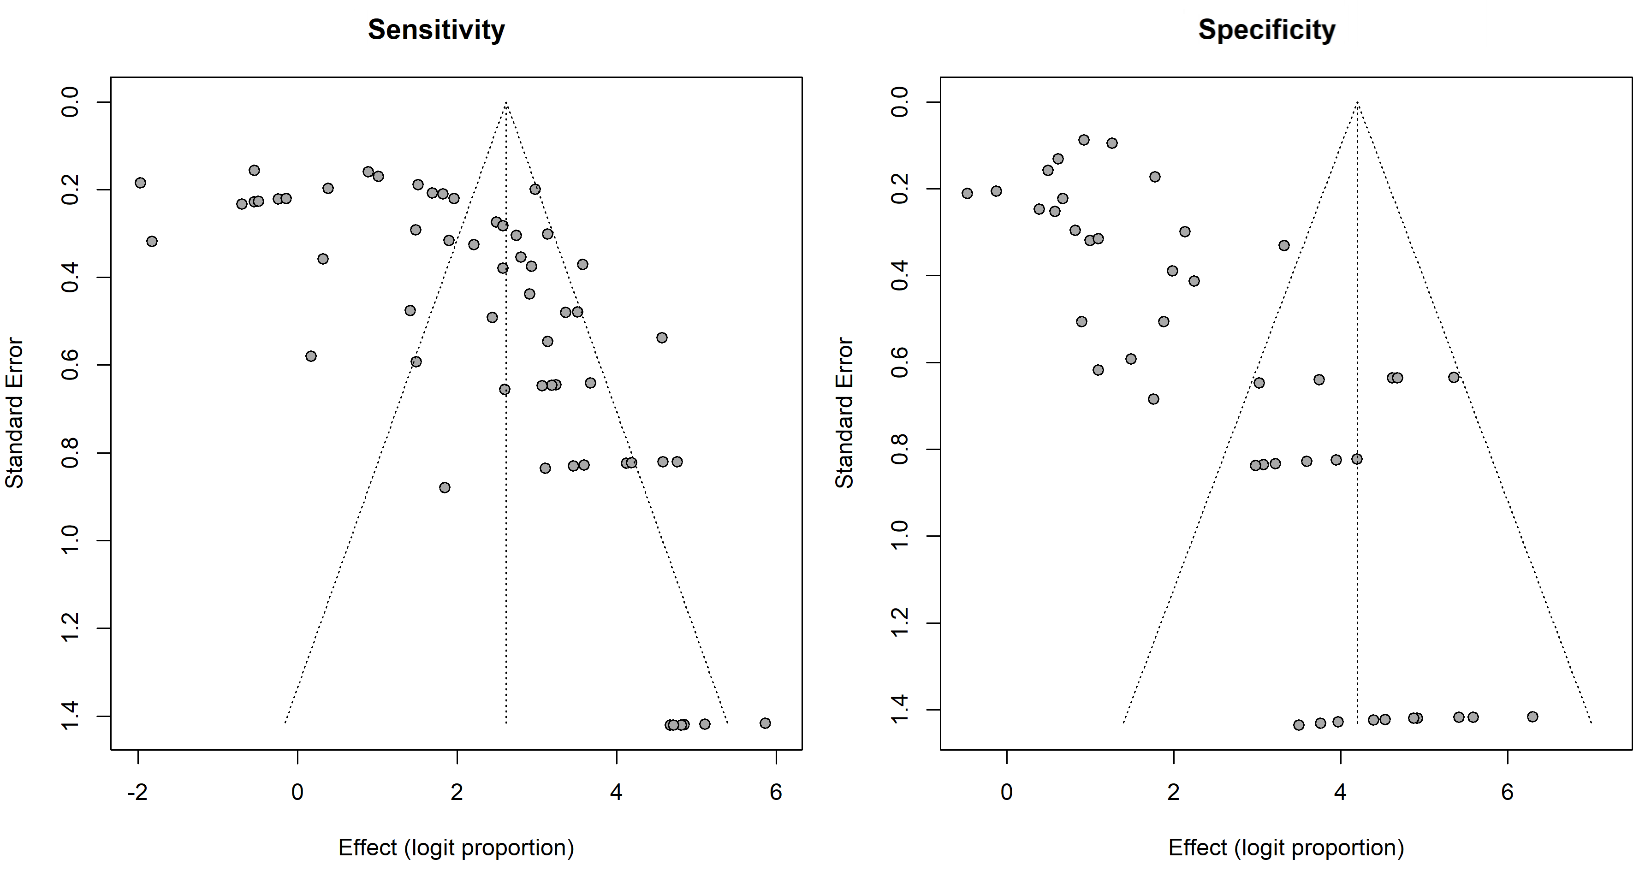


**Figure S35.** Funnel plots for IgG evaluations showing sensitivity and specificity. Plots display study-level estimates against a measure of precision to visually assess small-study effects and potential publication bias within the IgG subgroup (k = 61).


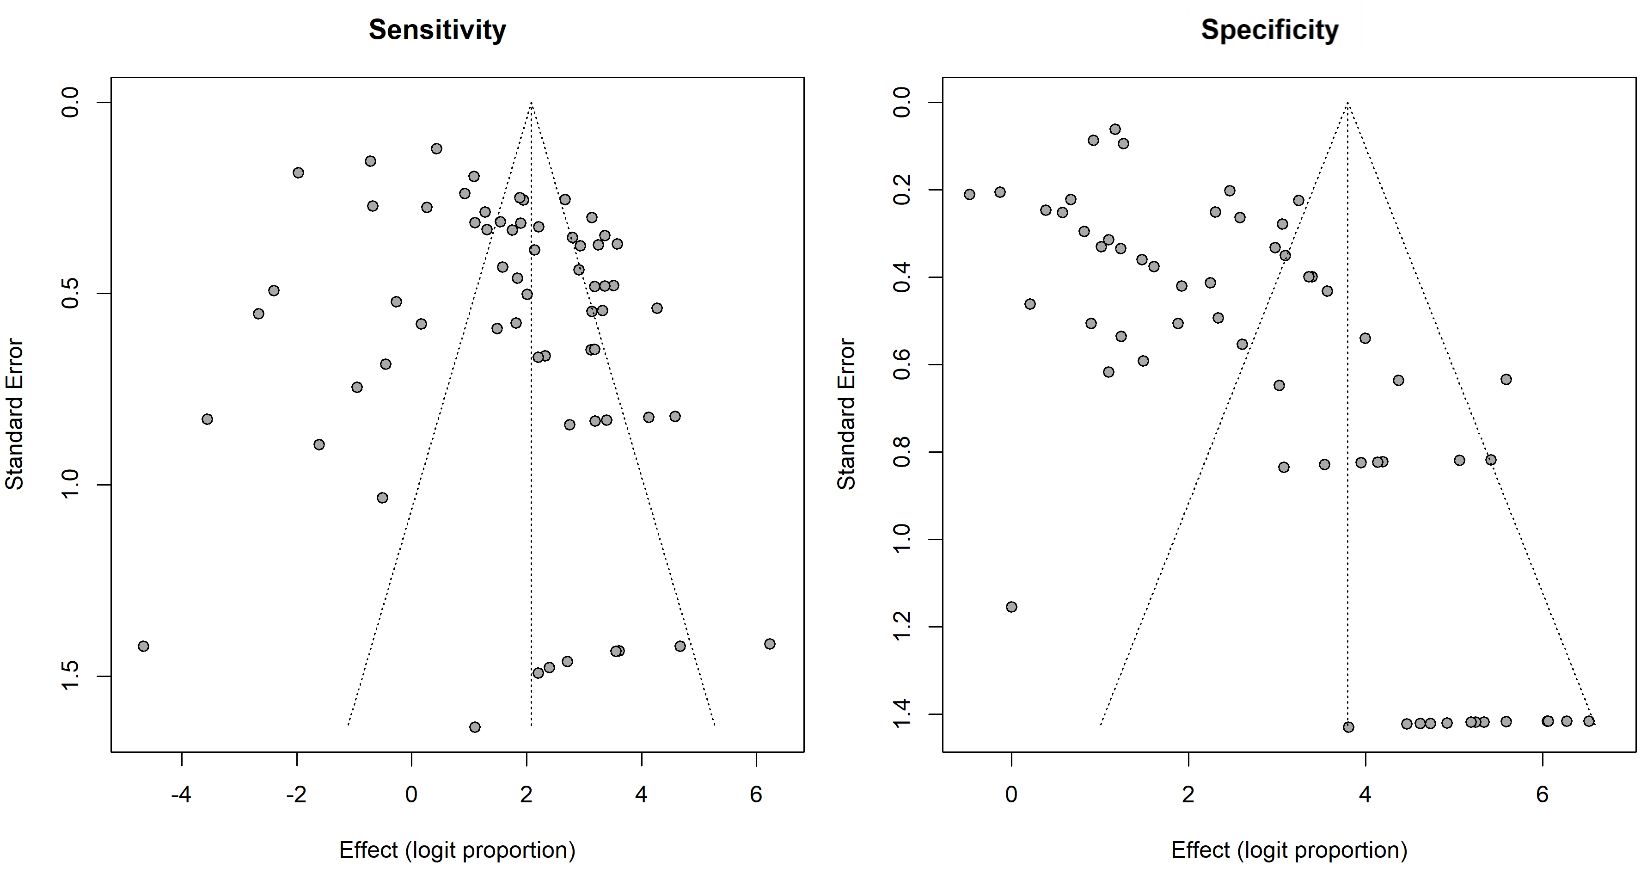


**Figure S36.** Funnel plots for pregnancy/antenatal evaluations showing sensitivity and specificity. Plots display study-level estimates against a measure of precision to visually assess small-study effects and potential publication bias within the pregnancy/antenatal subgroup (k = 74).


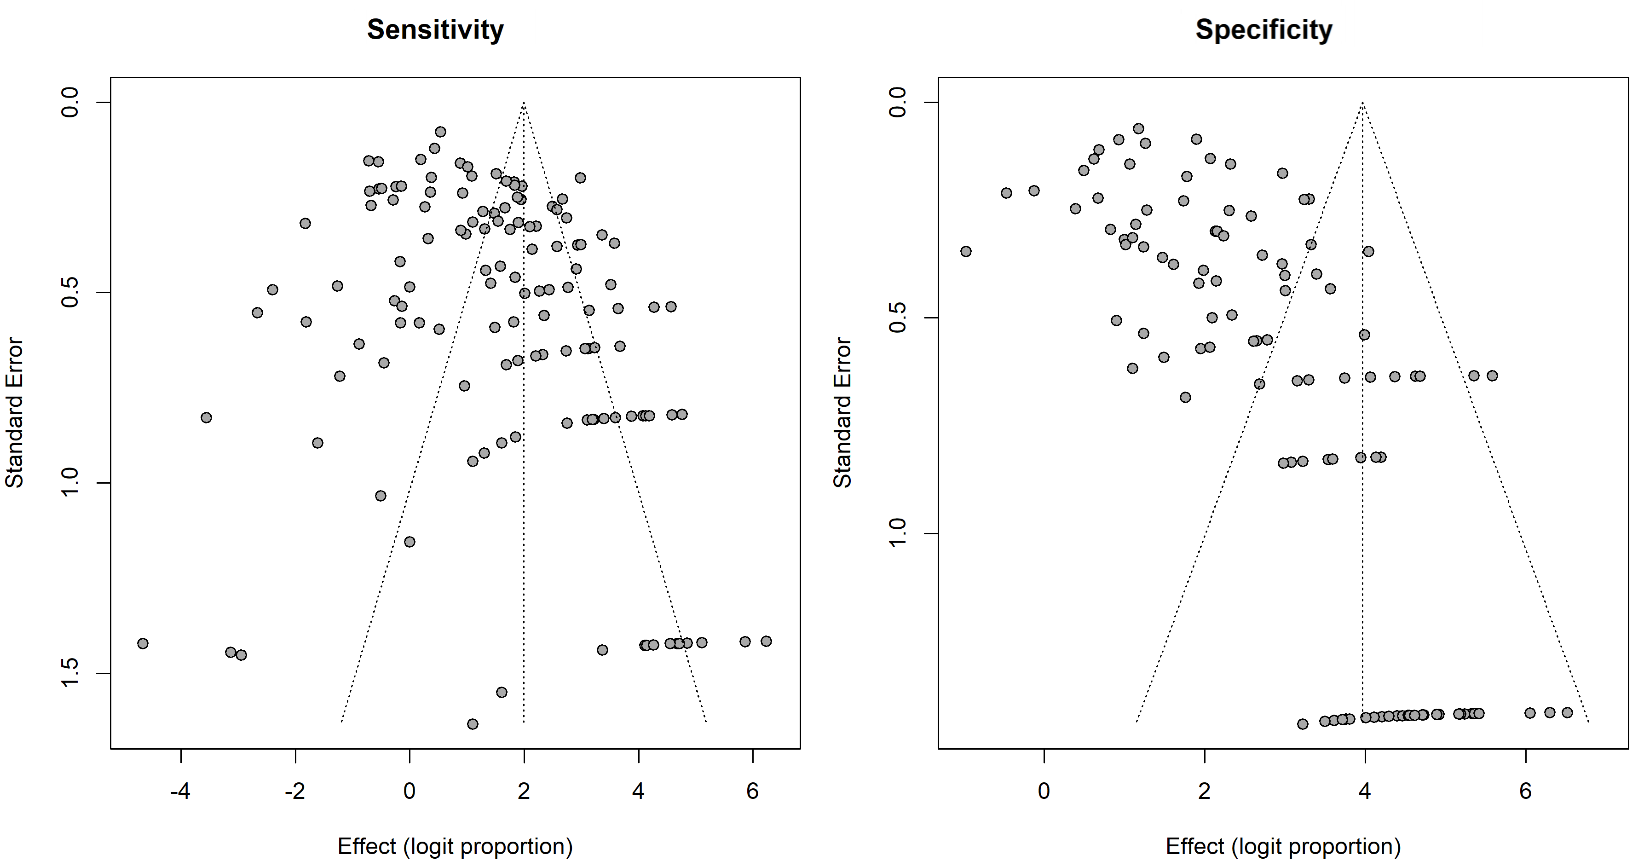


**Figure S37.** Funnel plots for Conventional laboratory-based evaluations showing sensitivity and specificity. Plots display study-level estimates against a measure of precision to visually assess small-study effects and potential publication bias within the Conventional subgroup (k = 140).


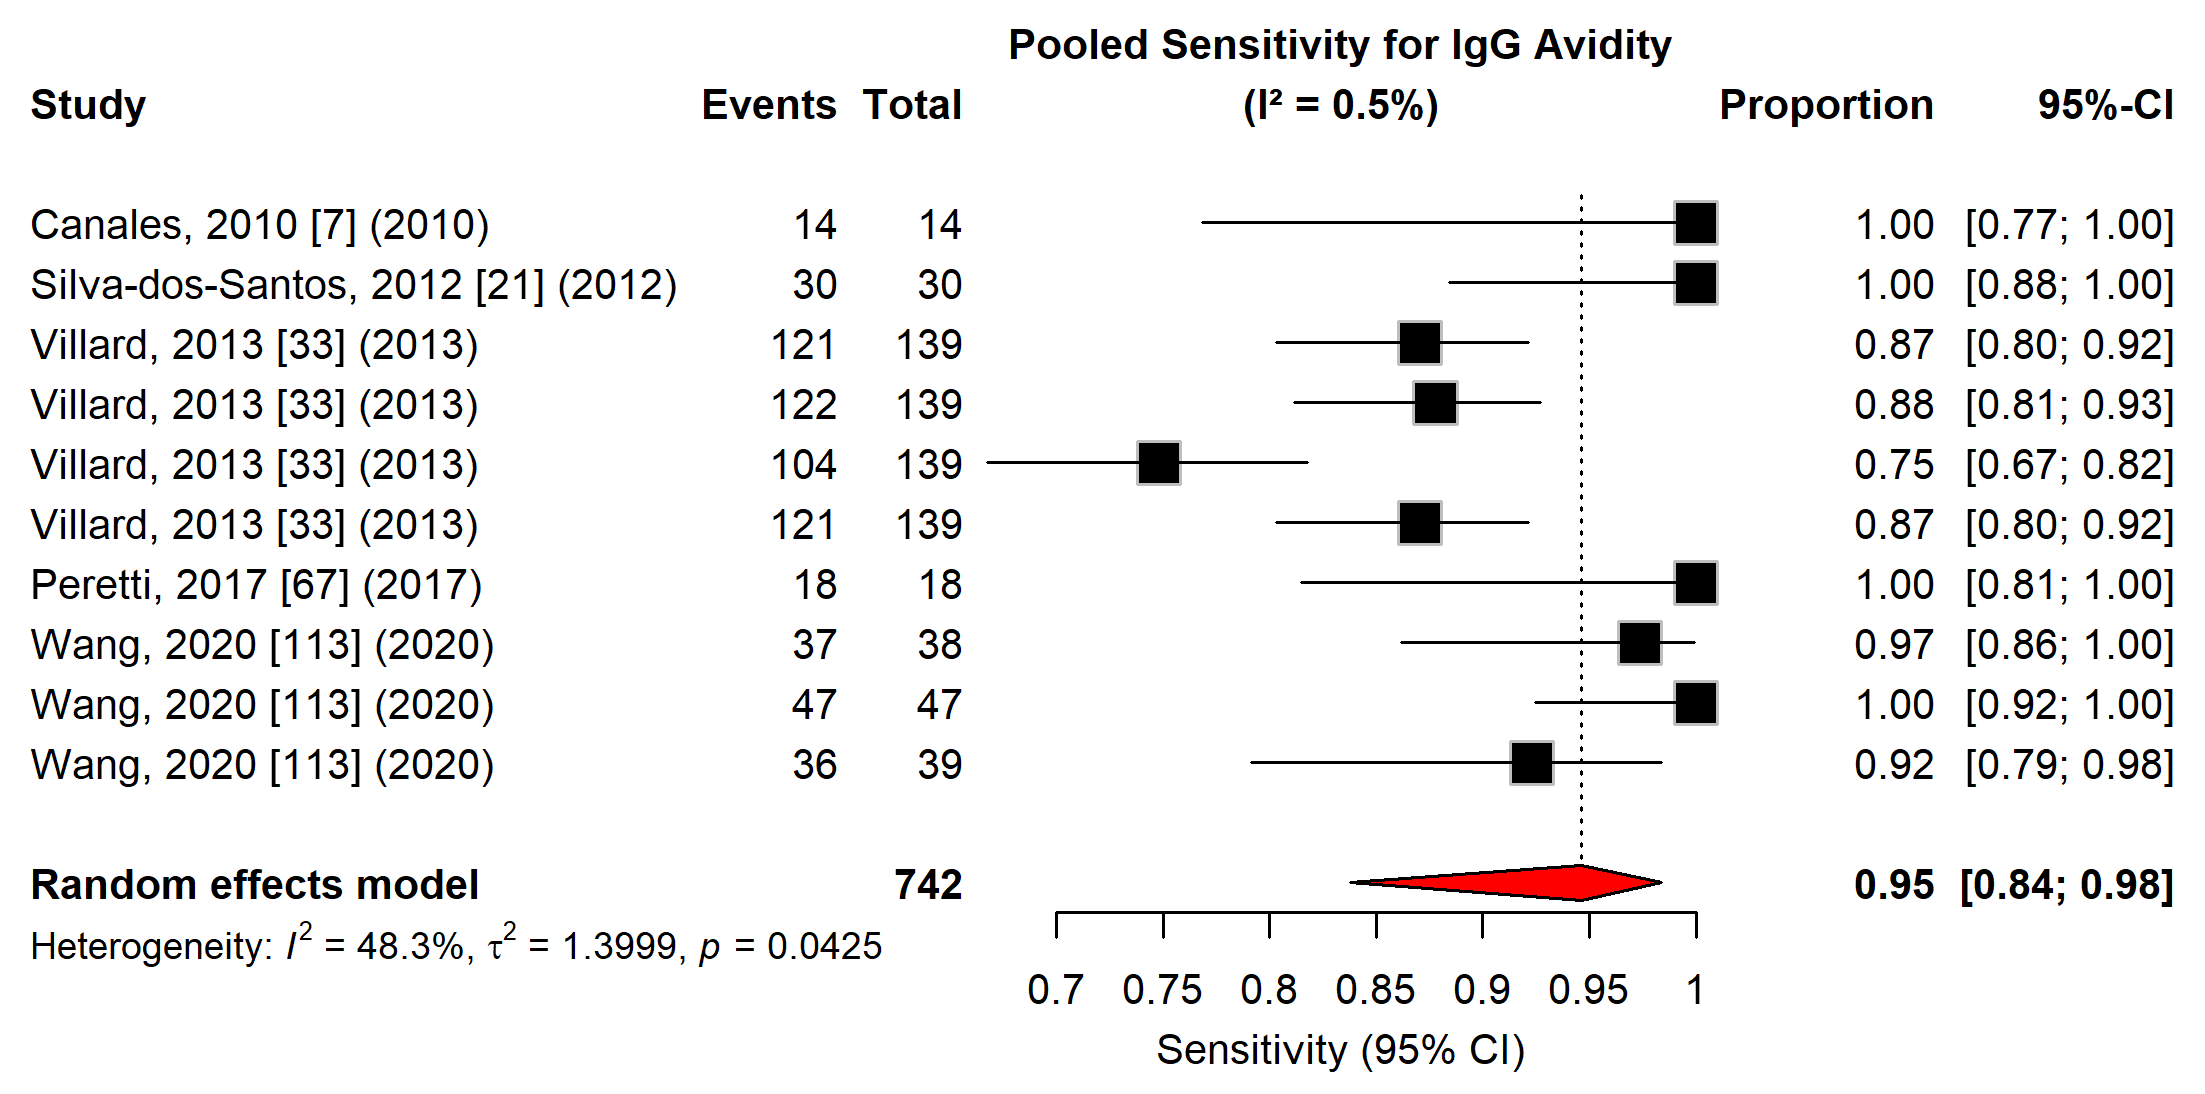


**Figure S38**. Forest plot of sensitivity for the IgG avidity detection target subgroup (k = 10). Individual study sensitivity estimates with 95% confidence intervals are shown, illustrating between-study variability in sensitivity across IgG avidity evaluations.


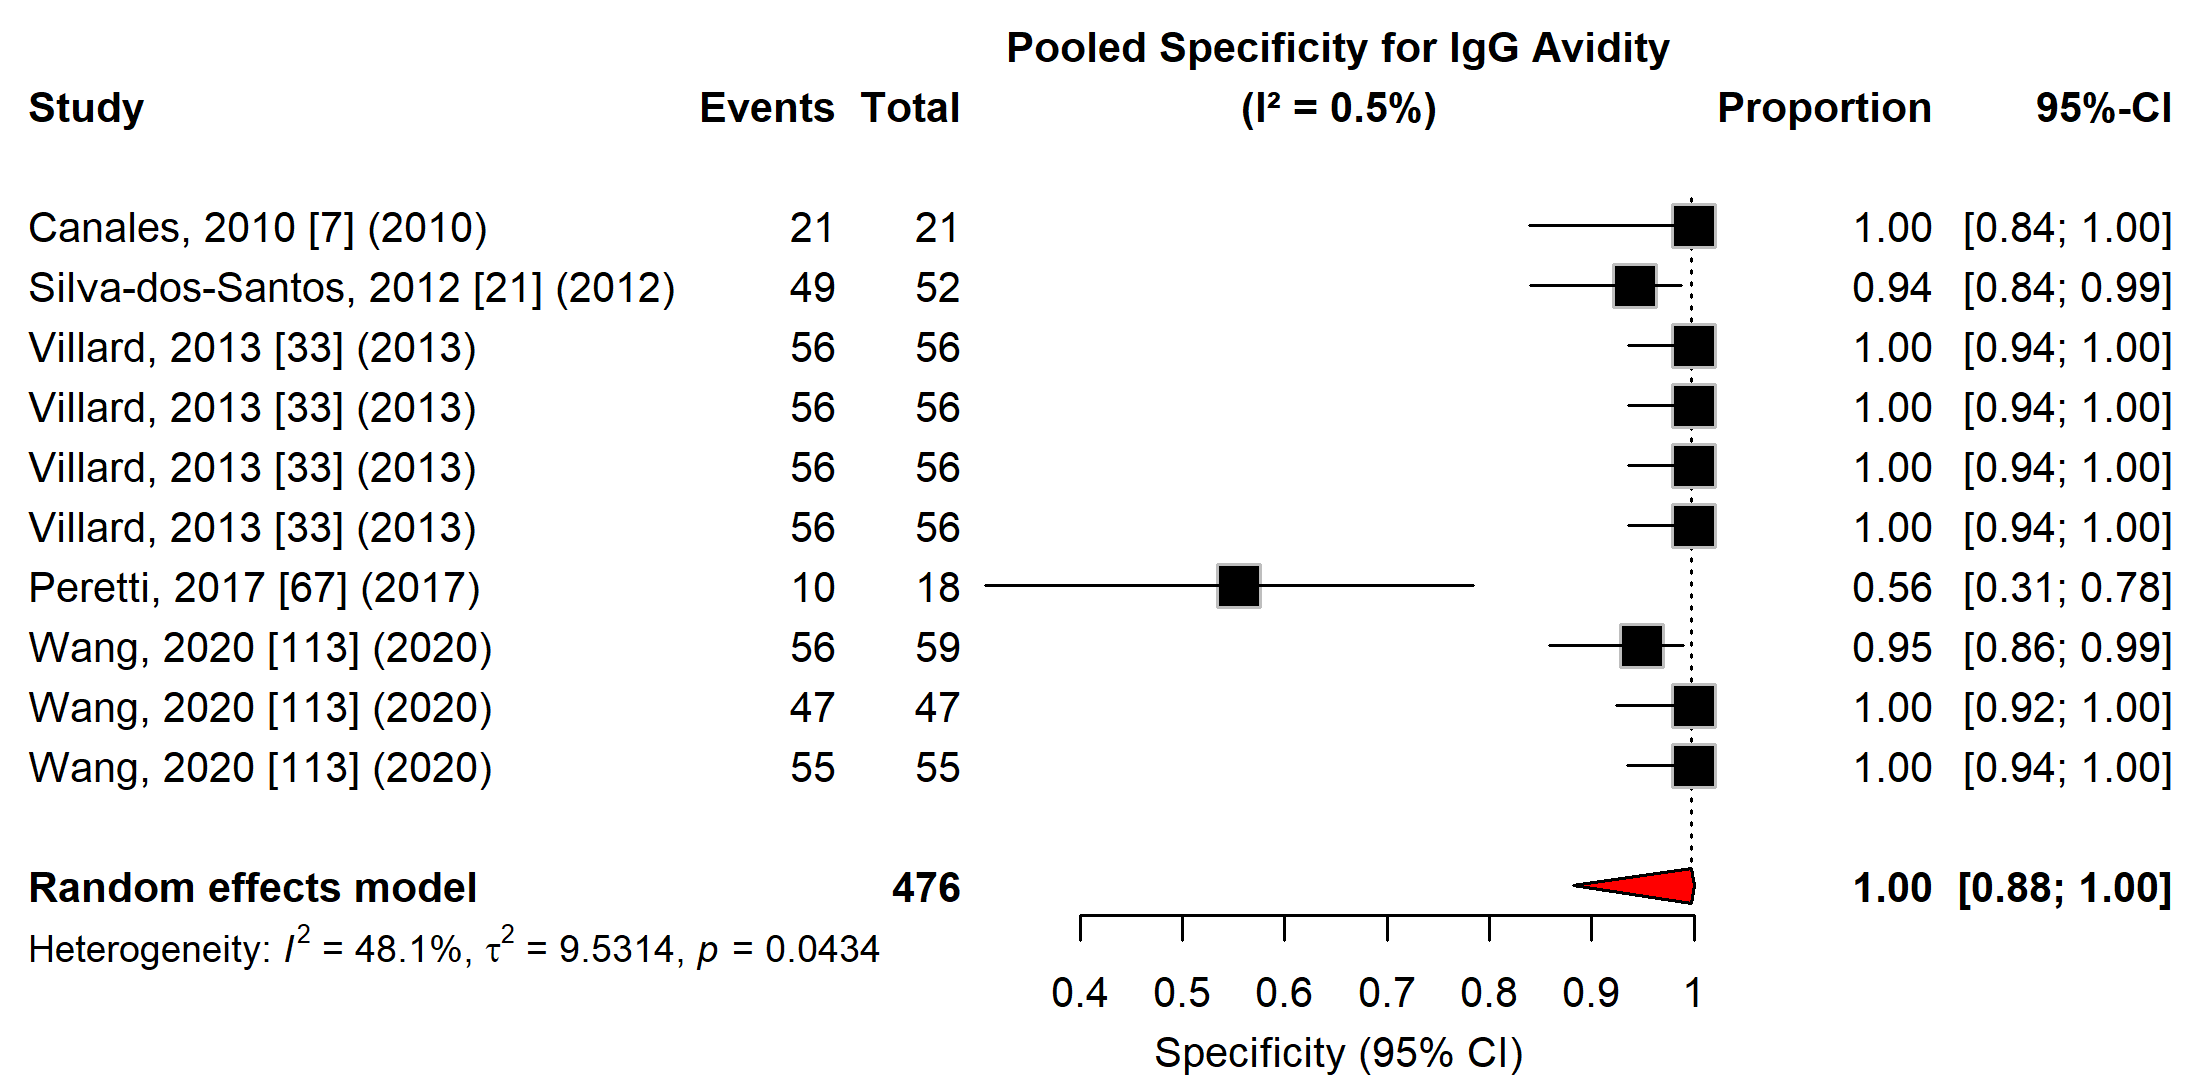


**Figure S39**. Forest plot of specificity for the IgG avidity detection target subgroup (k = 10). Individual study specificity estimates with 95% confidence intervals are shown, illustrating variability in specificity across IgG avidity evaluations.


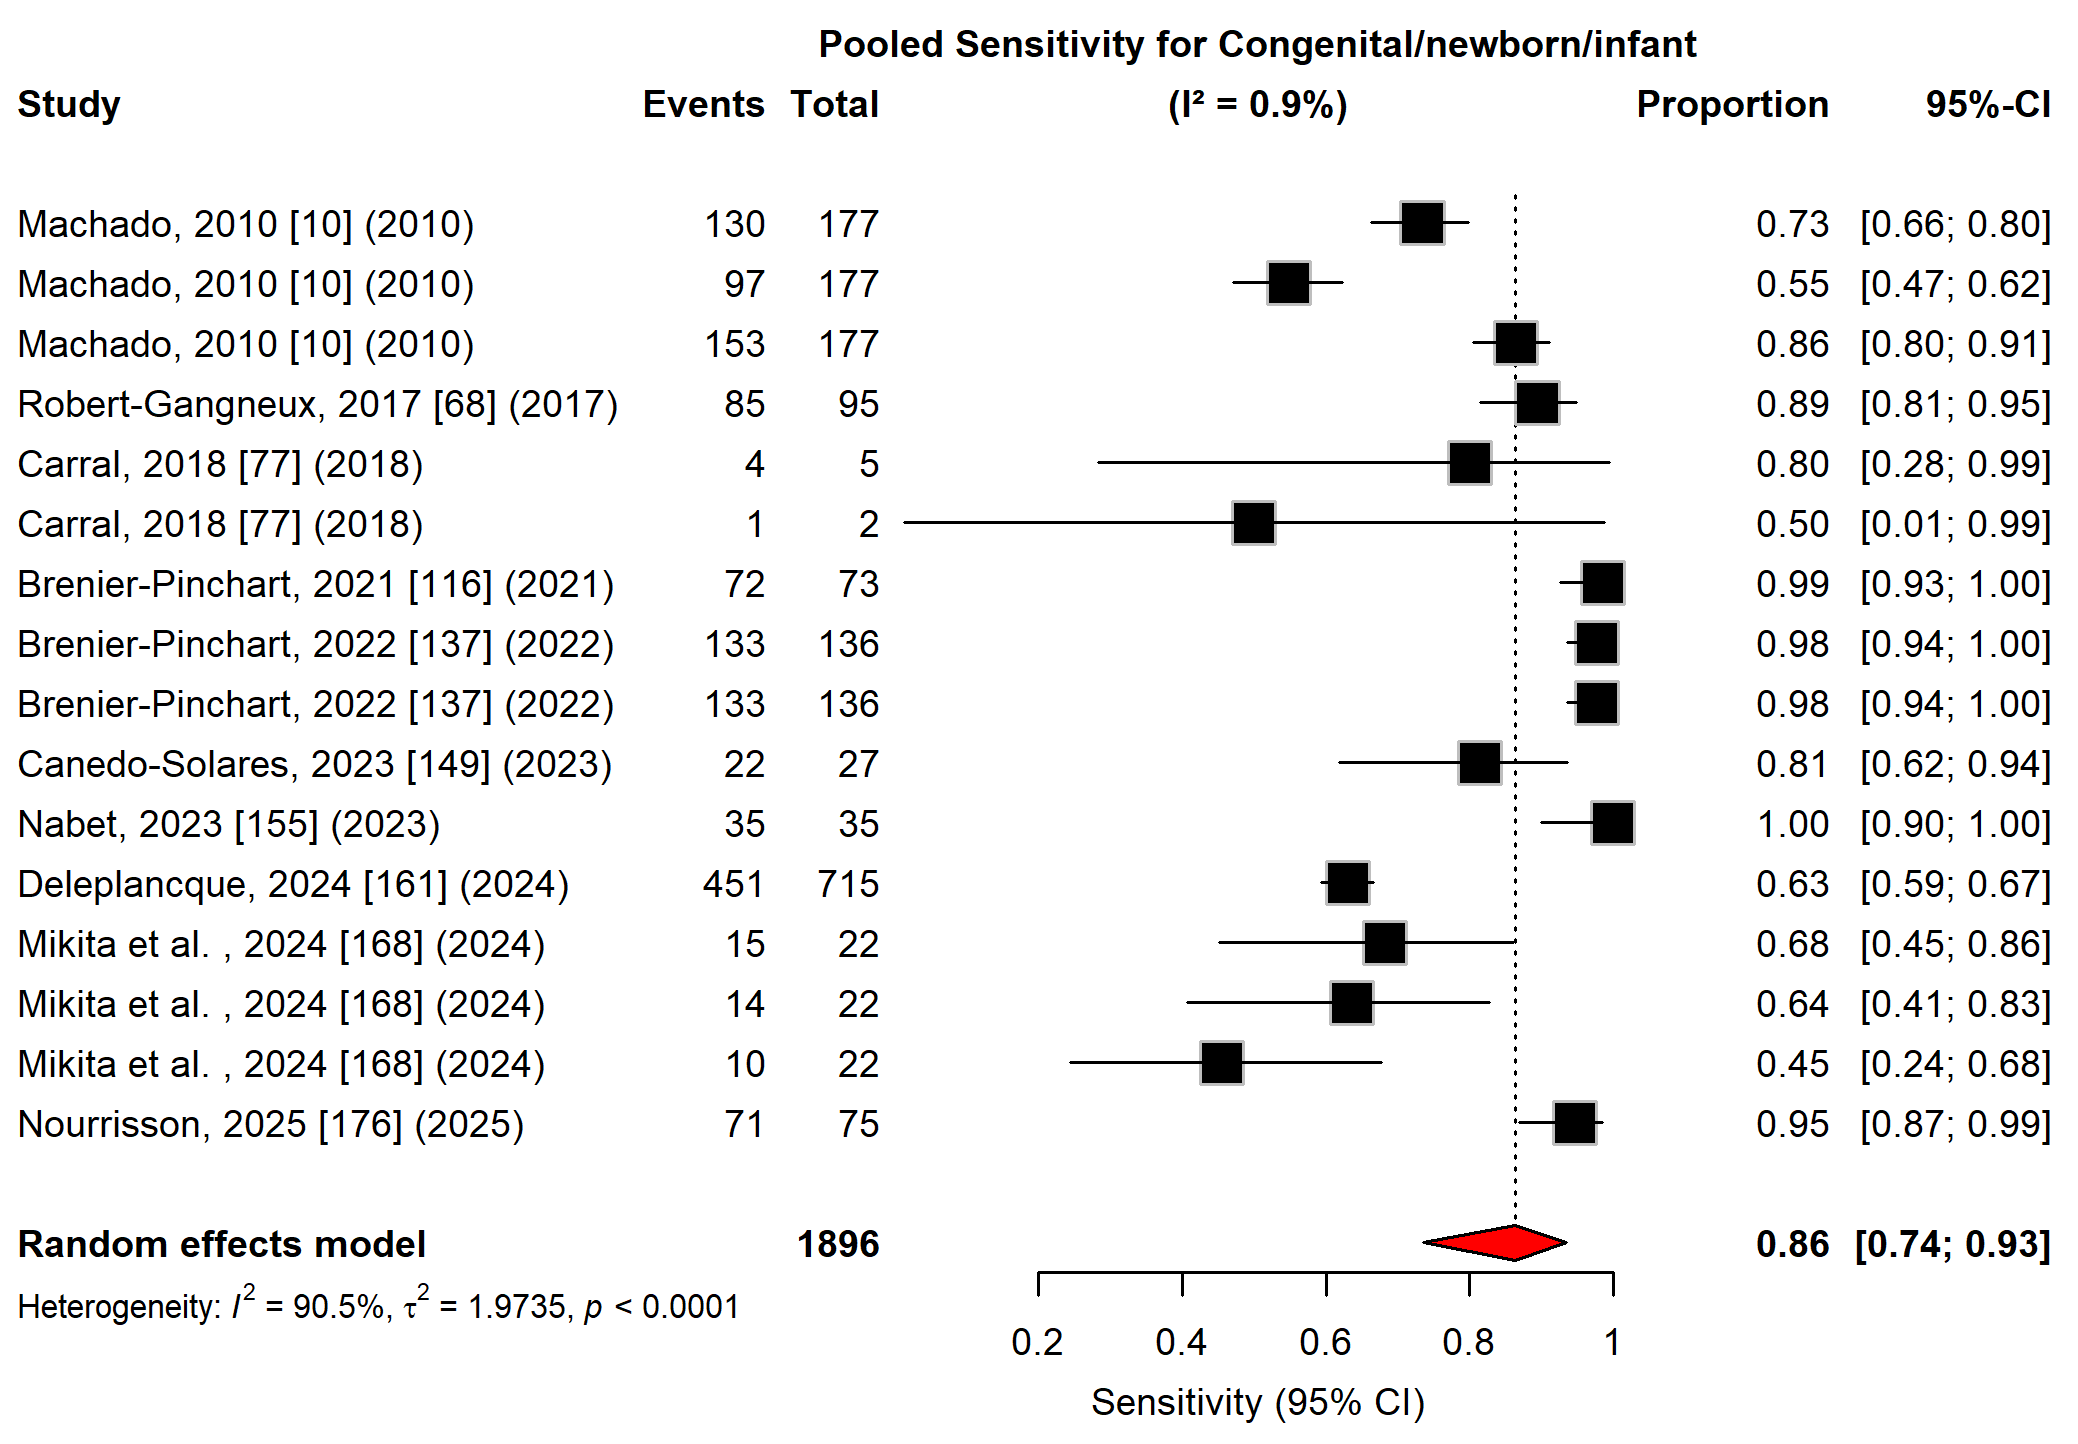


**Figure S40**. Forest plot of sensitivity for the congenital/newborn/infant population subgroup (k = 16). Individual study sensitivity estimates with 95% confidence intervals are displayed, illustrating between-study variability in sensitivity across congenital/newborn/infant evaluations.


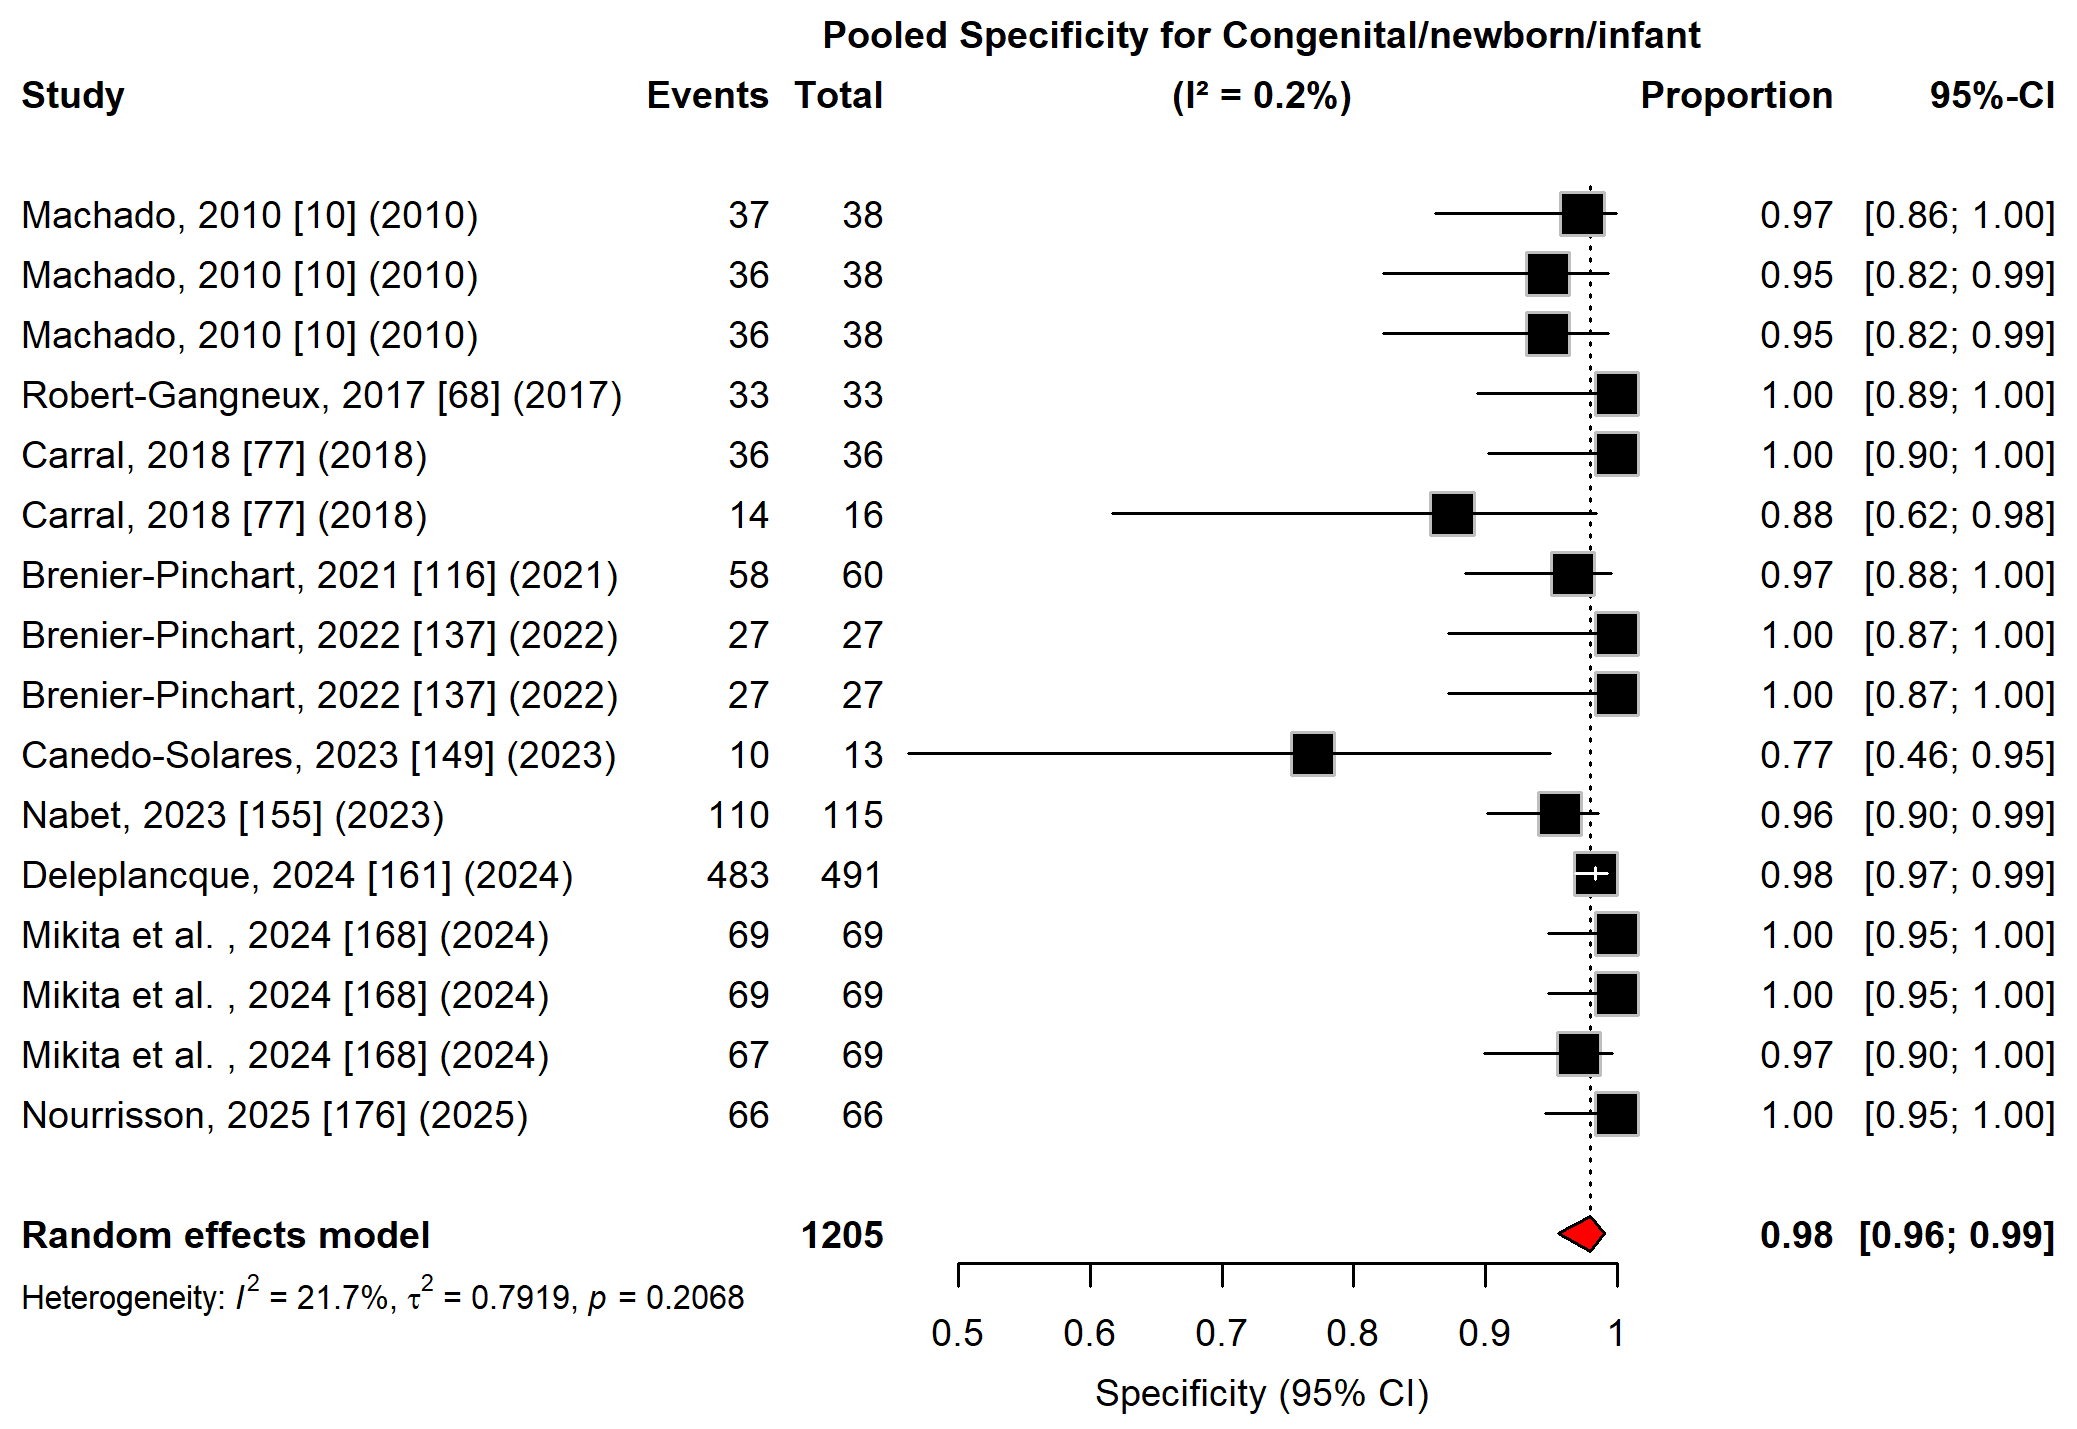


**Figure S41**. Forest plot of specificity for the congenital/newborn/infant population subgroup (k = 16). Individual study specificity estimates with 95% confidence intervals are displayed, illustrating variability in specificity across congenital/newborn/infant evaluations.


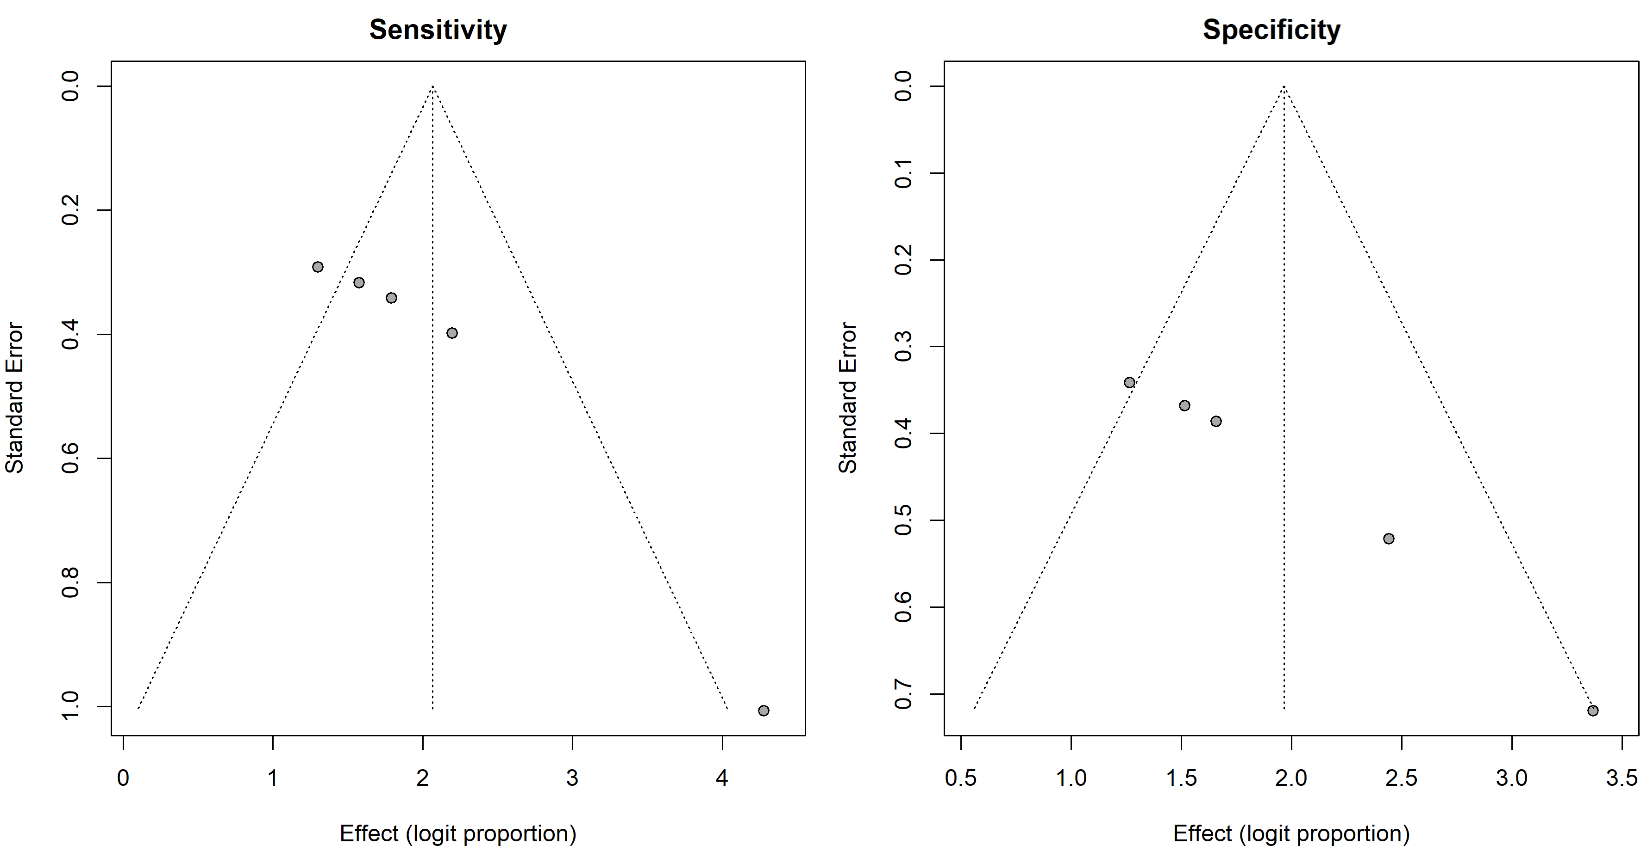


**Figure S42.** Funnel plots for antigen evaluations showing sensitivity and specificity. Plots display study-level estimates against a measure of precision to visually assess small-study effects and potential publication bias within the antigen subgroup (k = 5).


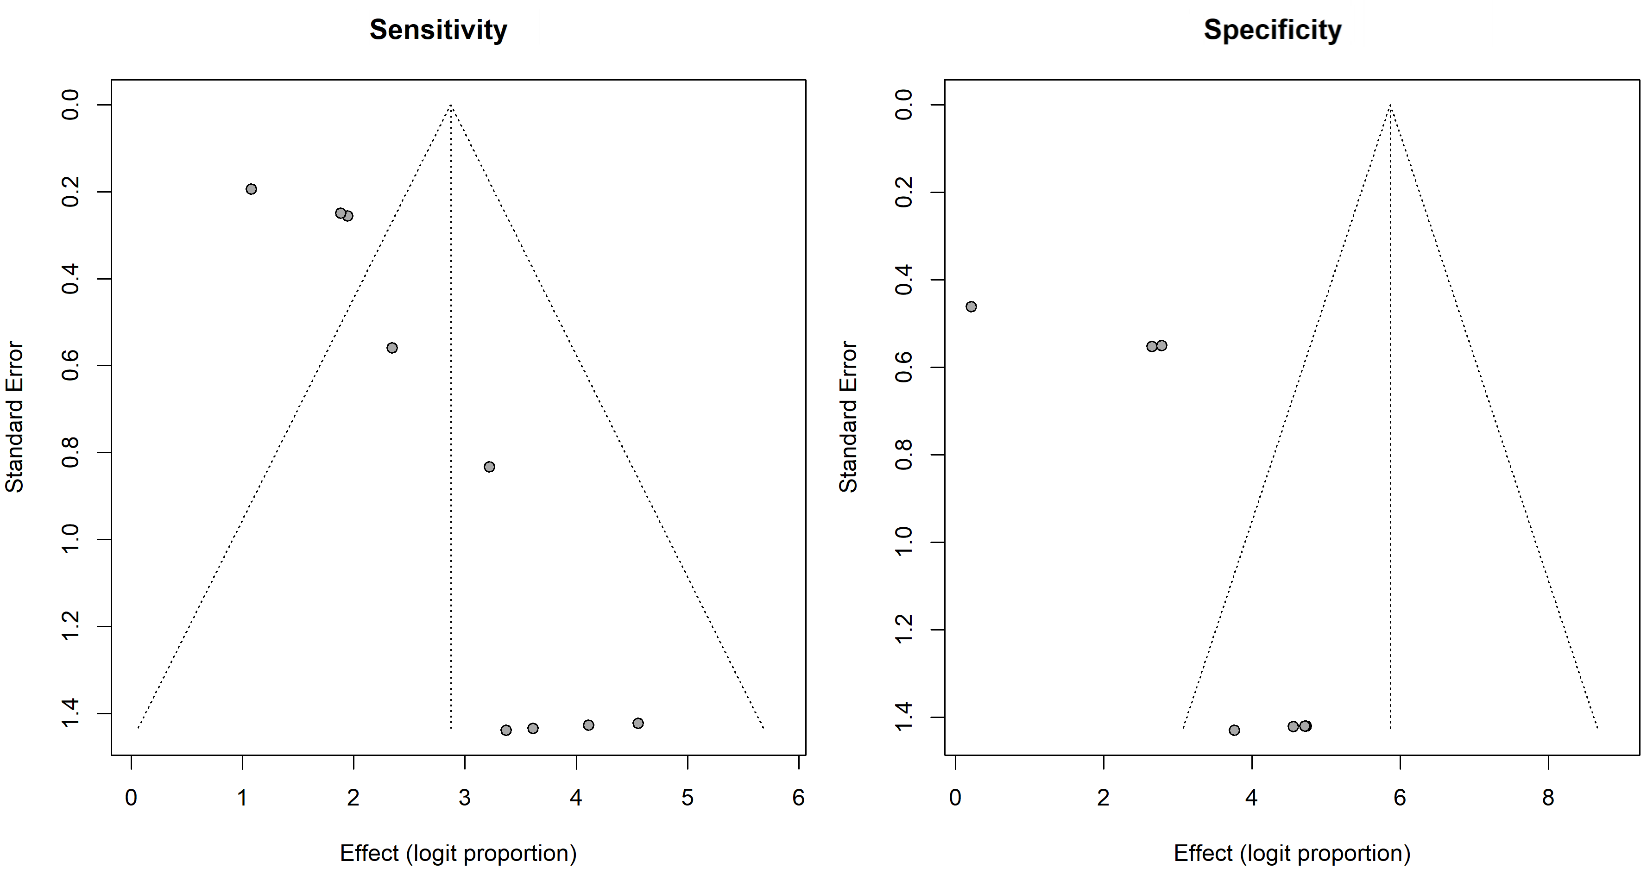


**Figure S43.** Funnel plots for IgG avidity evaluations showing sensitivity and specificity. Plots display study-level estimates against a measure of precision to visually assess small-study effects and potential publication bias within the IgG avidity subgroup (k = 10).


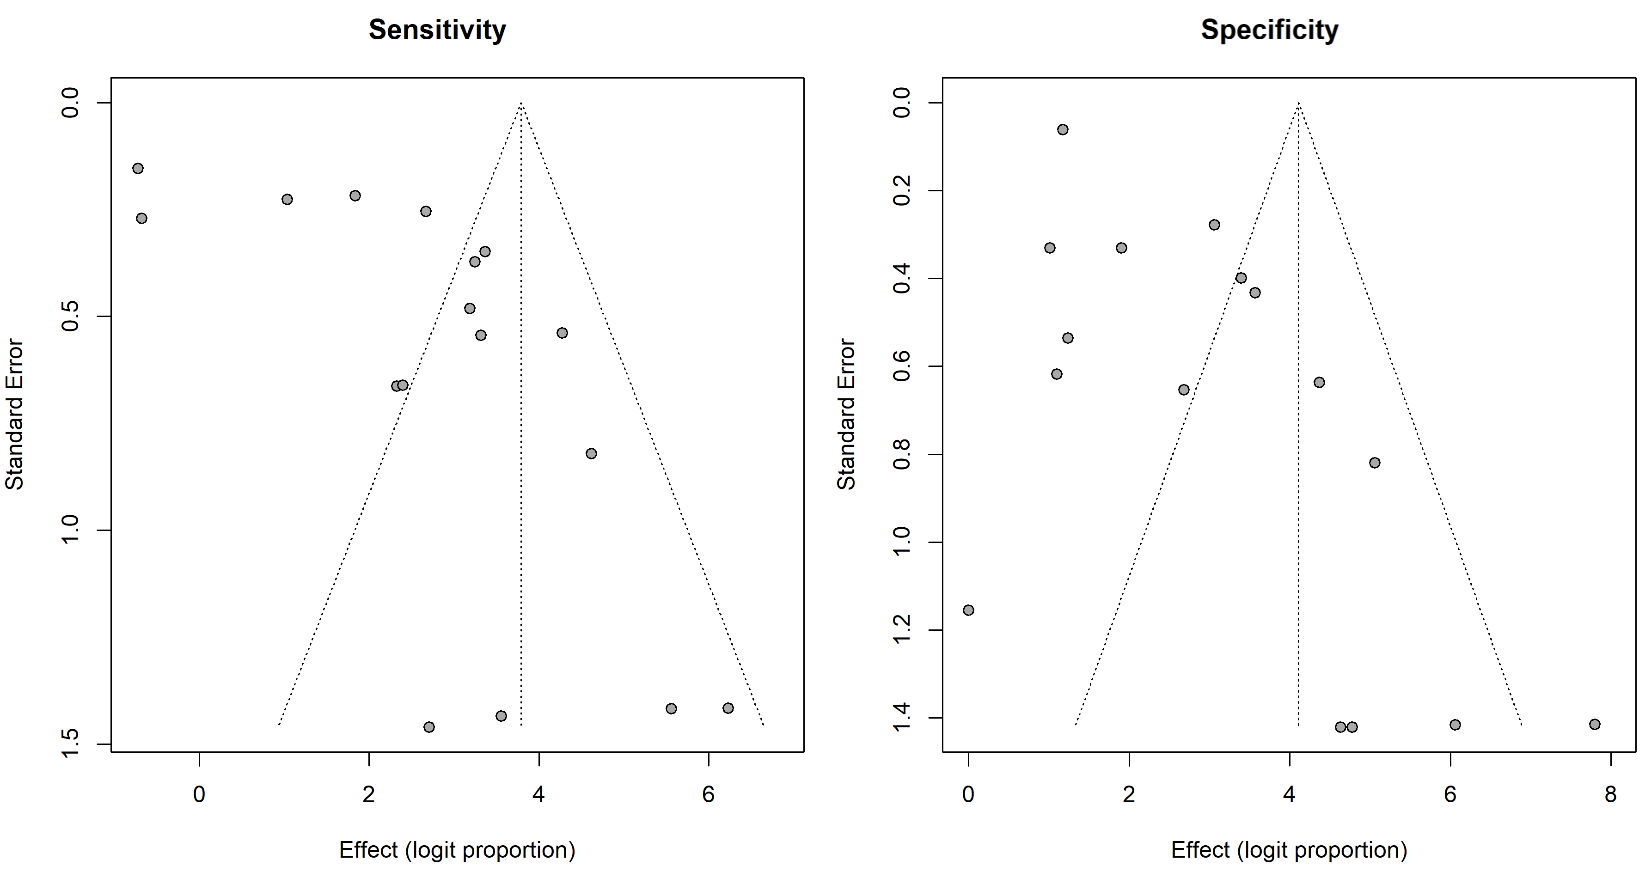


**Figure S44.** Funnel plots for IgG+IgM (combined) evaluations showing sensitivity and specificity. Plots display study-level estimates against a measure of precision to visually assess small-study effects and potential publication bias within the IgG+IgM subgroup (k = 22).


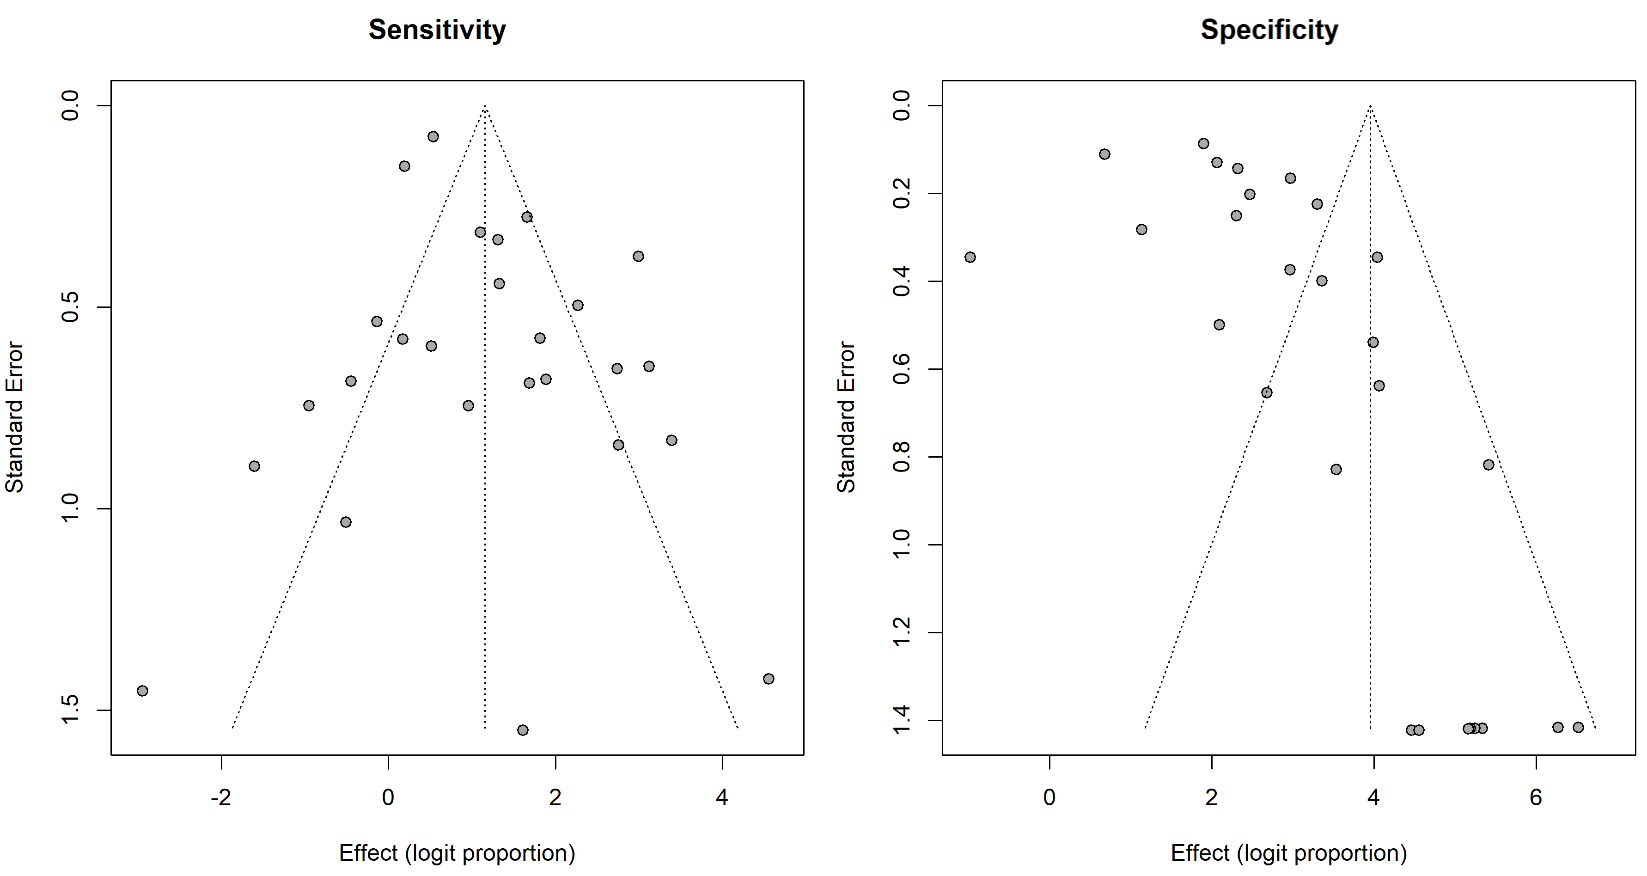


**Figure S45.** Funnel plots for IgM evaluations showing sensitivity and specificity. Plots display study-level estimates against a measure of precision to visually assess small-study effects and potential publication bias within the IgM subgroup (k = 29).


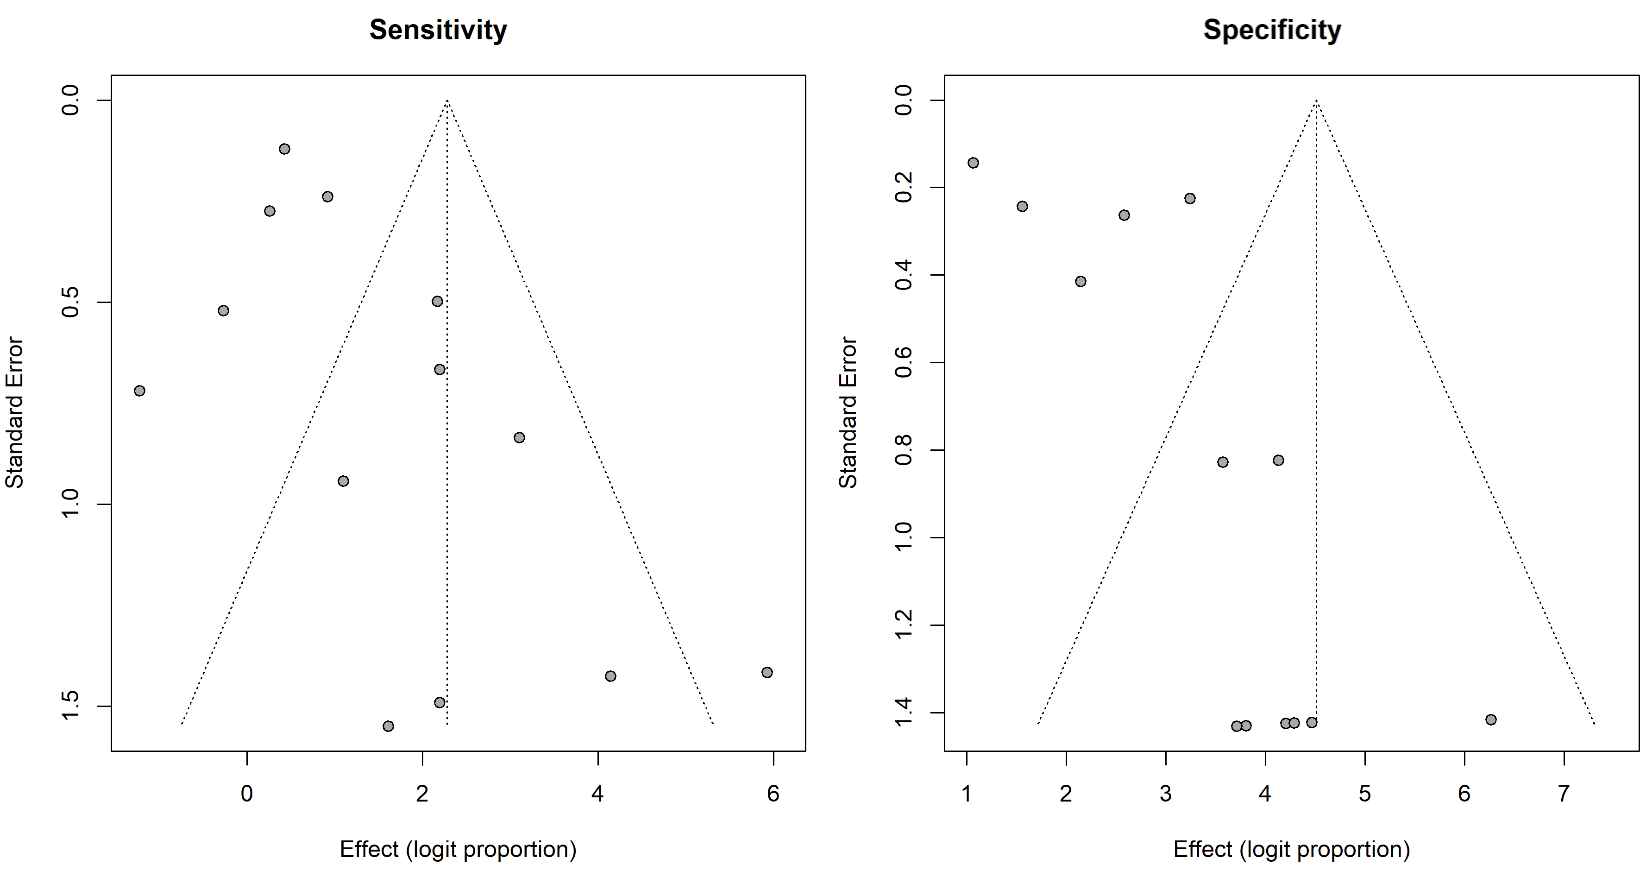


**Figure S46.** Funnel plots for the Other detection-target category showing sensitivity and specificity. Plots display study-level estimates against a measure of precision to visually assess small-study effects and potential publication bias within this subgroup (k = 14).


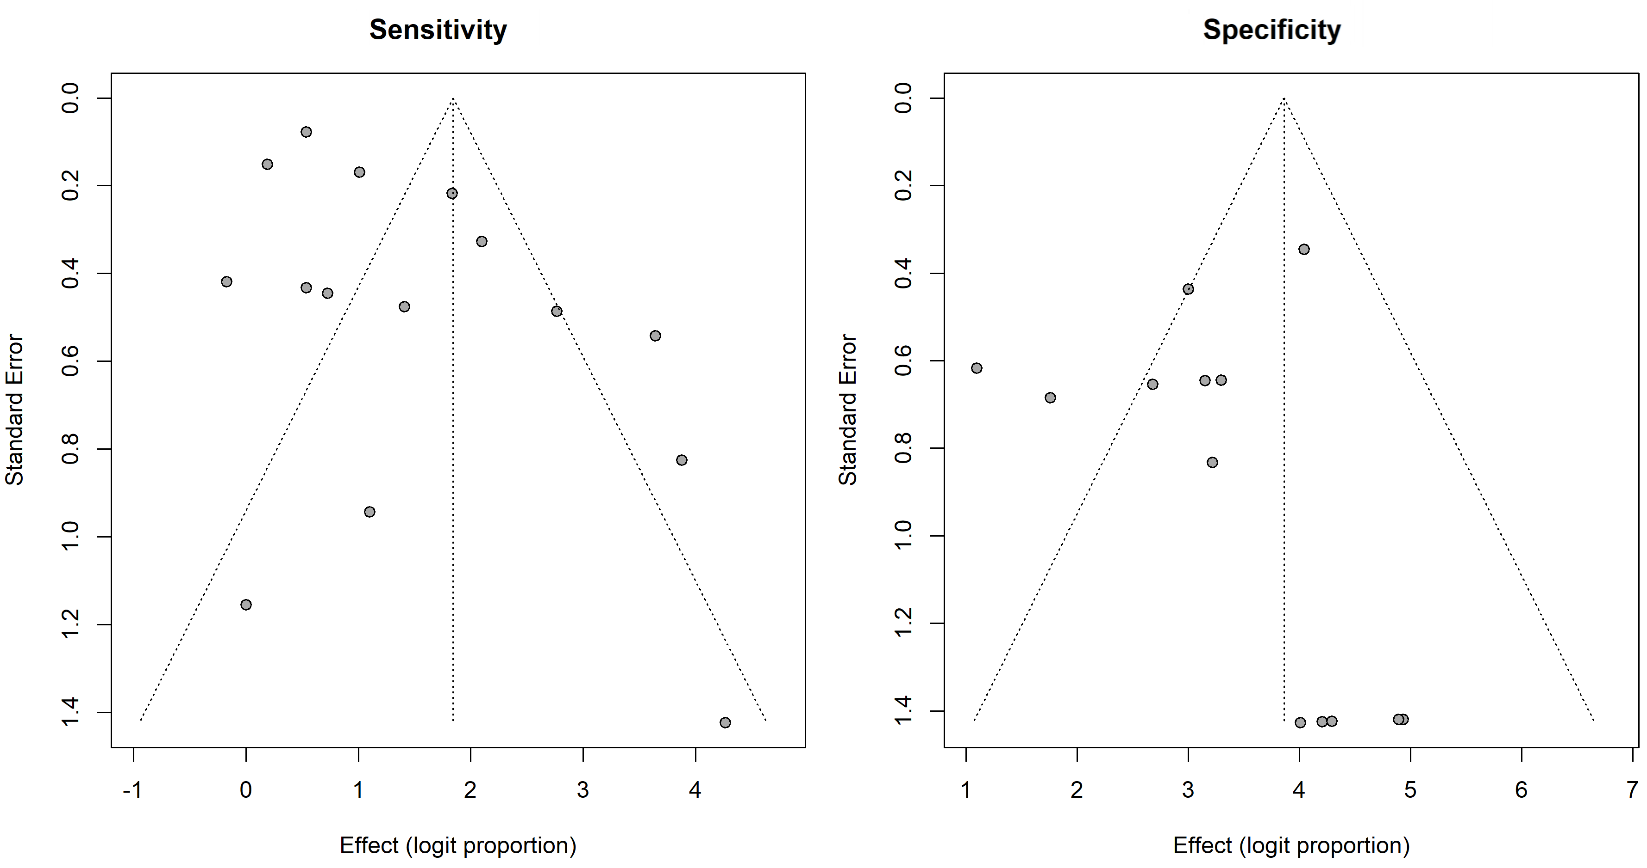


**Figure S47.** Funnel plots for congenital/newborn/infant evaluations showing sensitivity and specificity. Plots display study-level estimates against a measure of precision to visually assess small-study effects and potential publication bias within this subgroup (k = 16).


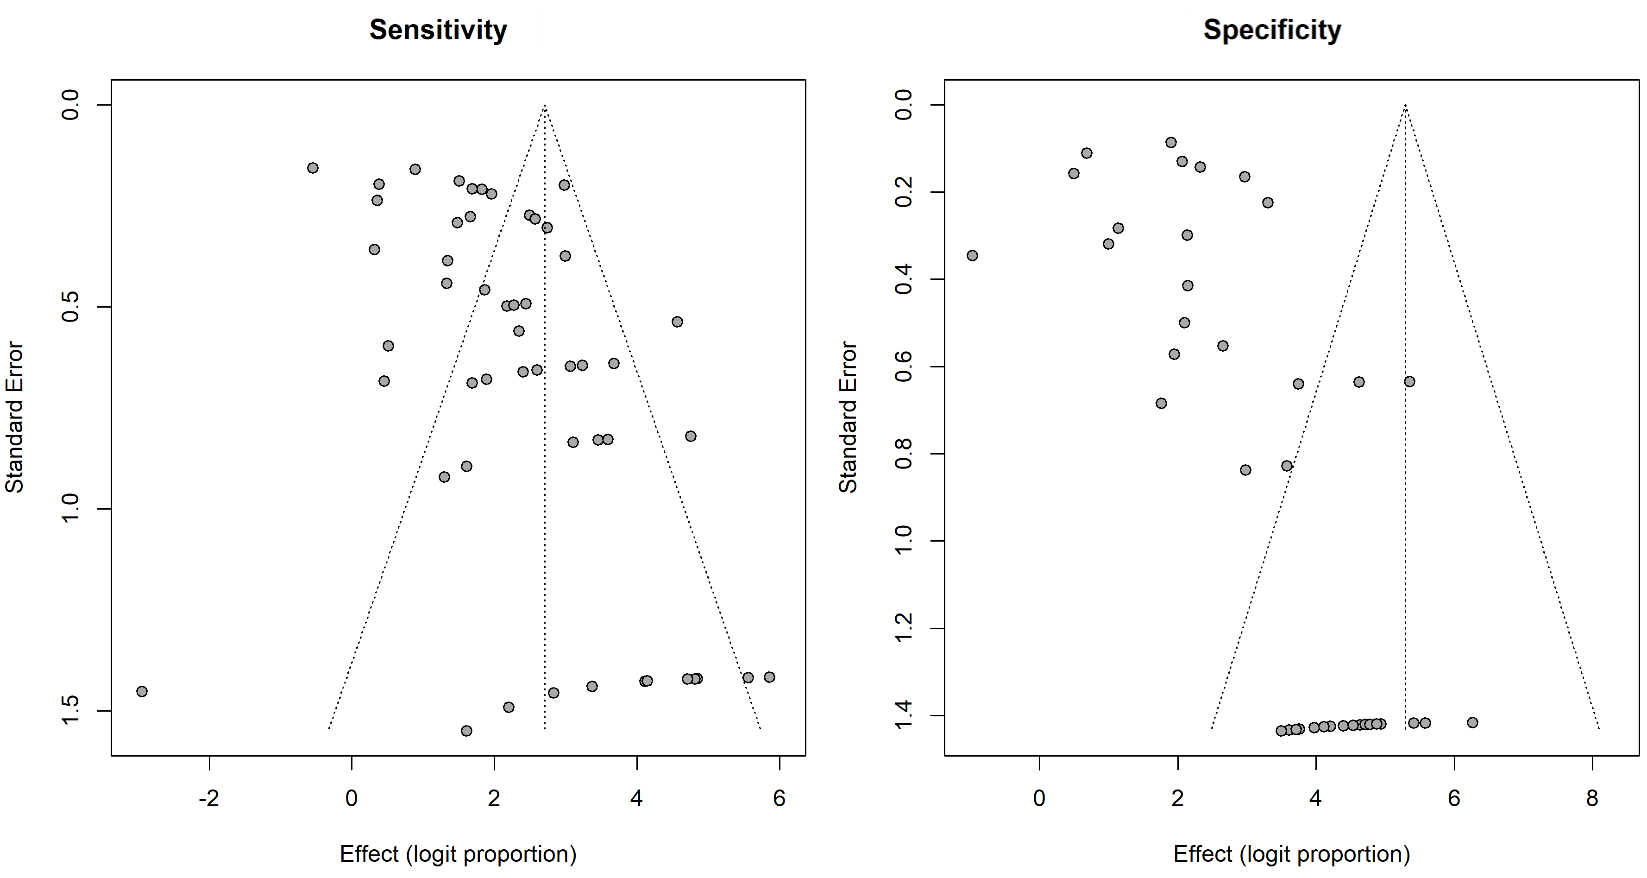


**Figure S48.** Funnel plots for general/mixed/other evaluations showing sensitivity and specificity. Plots display study-level estimates against a measure of precision to visually assess small-study effects and potential publication bias within this subgroup (k = 58).


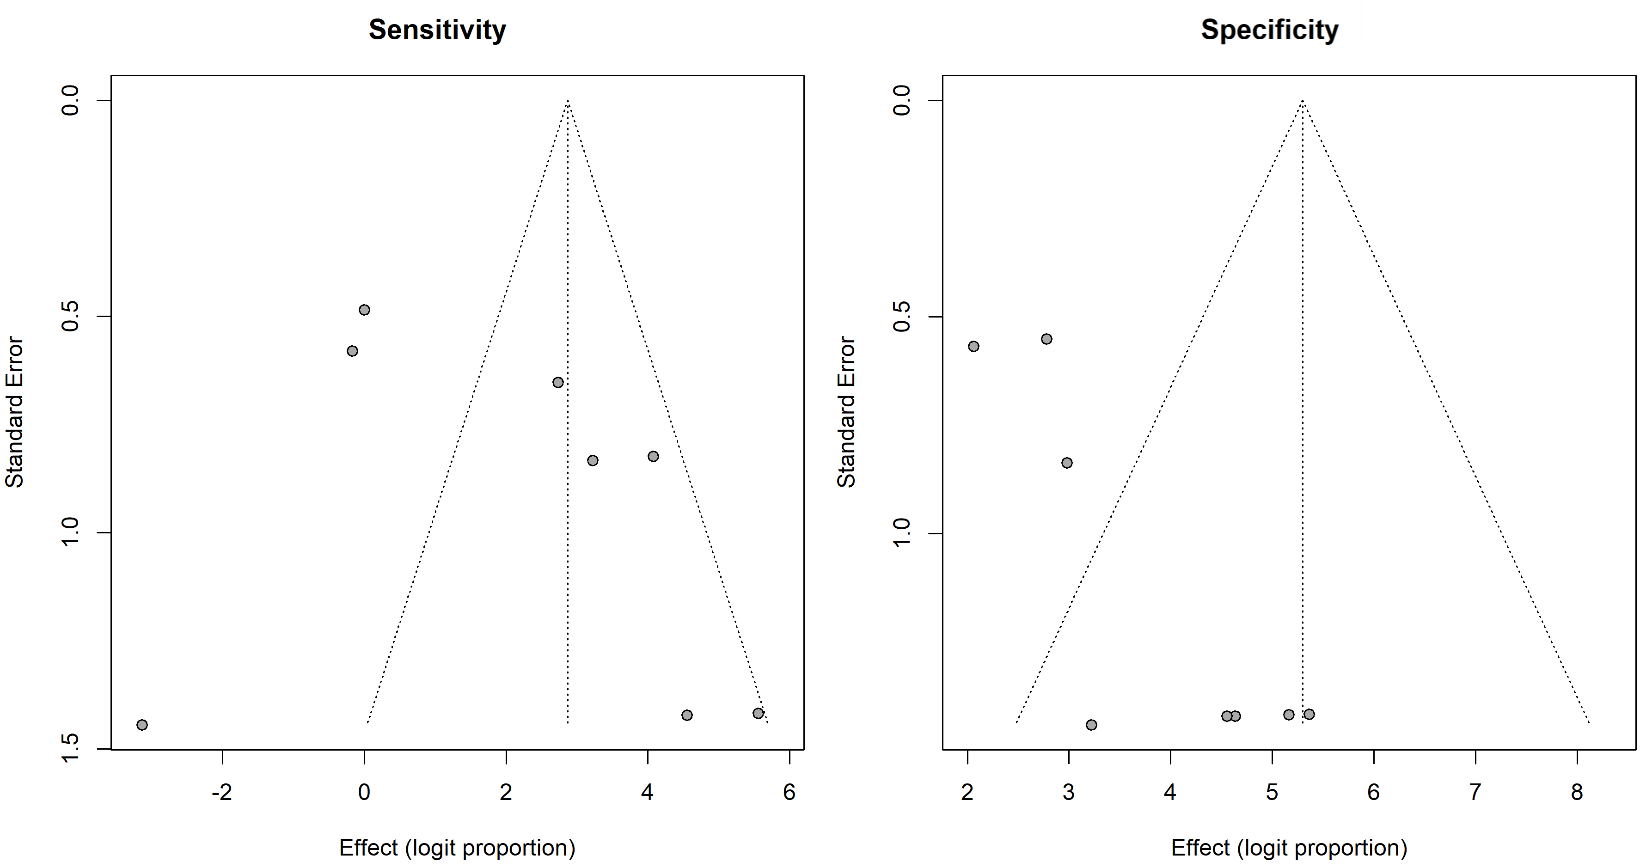


**Figure S49.** Funnel plots for HIV/AIDS evaluations showing sensitivity and specificity. Plots display study-level estimates against a measure of precision to visually assess small-study effects and potential publication bias within the HIV/AIDS subgroup (k = 10).


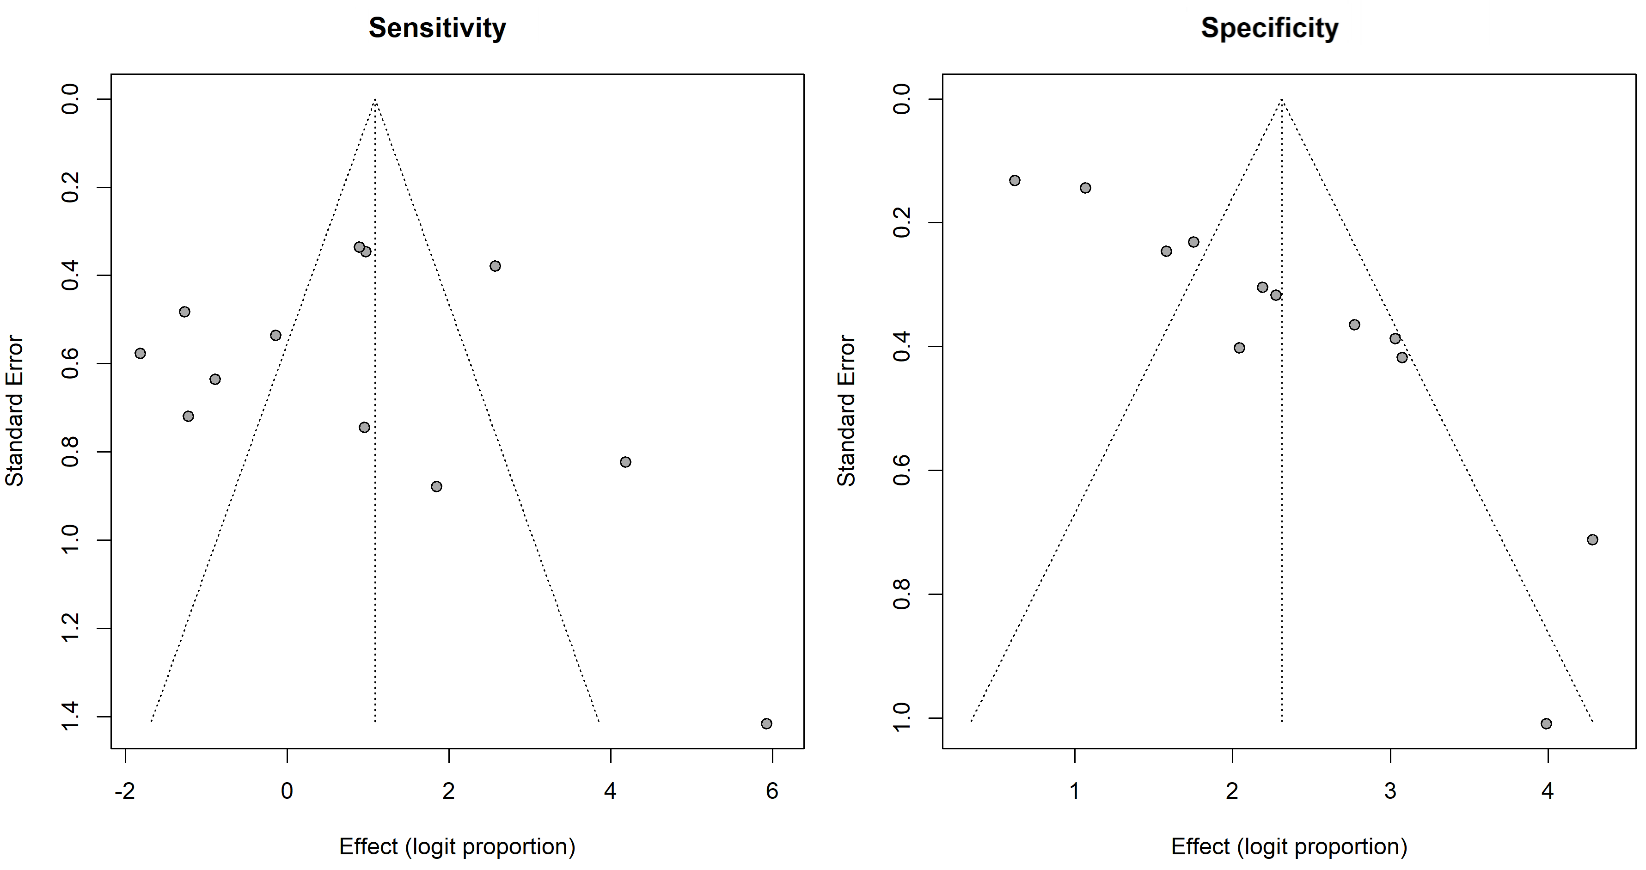


**Figure S50.** Funnel plots for ocular toxoplasmosis/ophthalmology evaluations showing sensitivity and specificity. Plots display study-level estimates against a measure of precision to visually assess small-study effects and potential publication bias within this subgroup (k = 12).


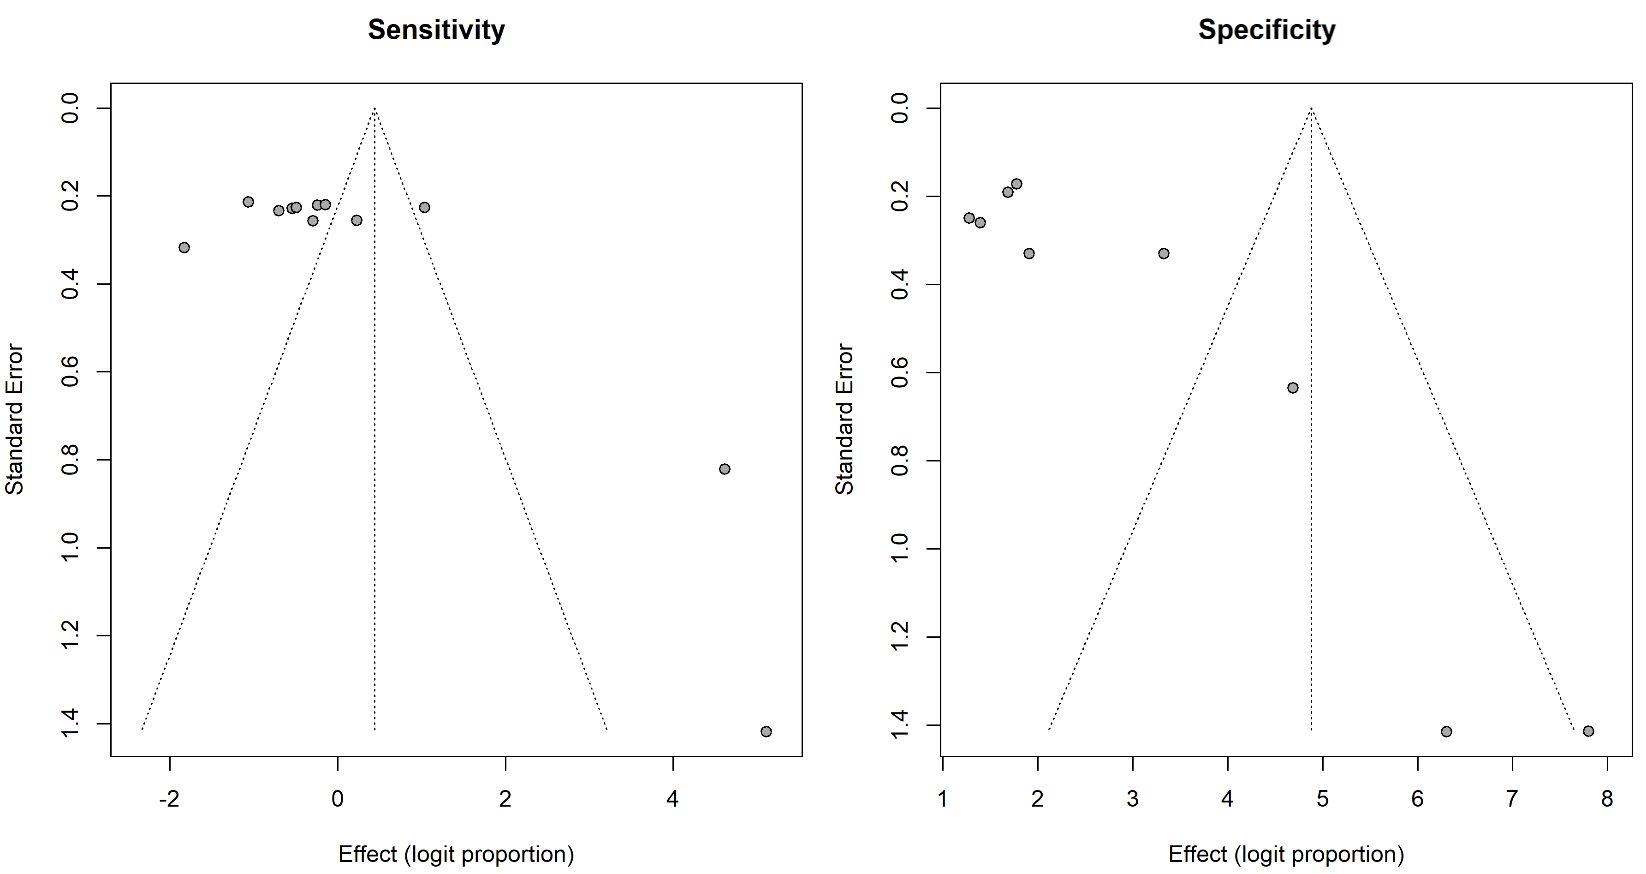


**Figure S51.** Funnel plots for other immunocompromised evaluations showing sensitivity and specificity. Plots display study-level estimates against a measure of precision to visually assess small-study effects and potential publication bias within this subgroup (k = 12).


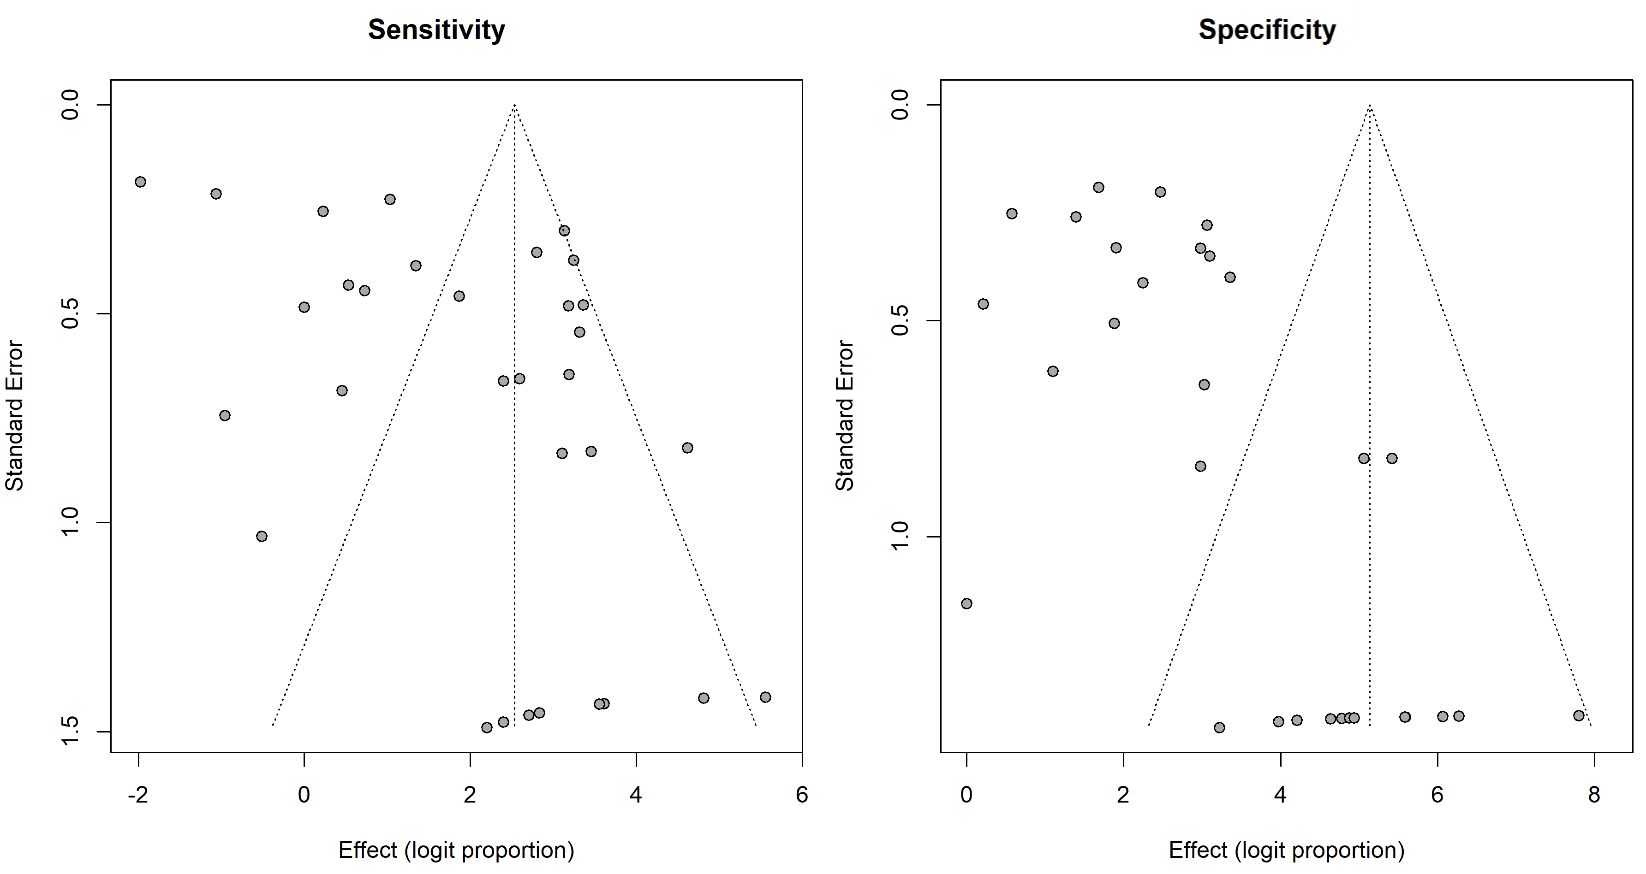


**Figure S52.** Funnel plots for POCT evaluations showing sensitivity and specificity. Plots display study-level estimates against a measure of precision to visually assess small-study effects and potential publication bias within the POCT subgroup (k = 40).

**Table S4.** PRISMA-DTA checklist for reporting diagnostic test accuracy systematic reviews. The table maps each PRISMA-DTA item to the corresponding manuscript section/page to document reporting completeness and transparency.


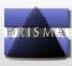


**PRISMA-DTA Checklist**

**A Systematic Review and Meta-Analysis of Diagnostic Test Accuracy for Human Toxoplasmosis: Performance, Populations, and Validation Gaps**

Dodit Suprianto, Loeki Enggar Fitri, Aulia Rahmi Pawestri, Nuning Winaris, Akhmad Sabarudin, Wayan Firdaus Mahmudy, Muhammad Hatta Prabowo, Werasak Surareungchai

| **Section/topic** | **#** | **PRISMA-DTA Checklist Item** | **Reported on page #** |
| --- | --- | --- | --- |
| **TITLE / ABSTRACT** | | |  |
| Title | 1 | Identify the report as a systematic review (+/- meta-analysis) of diagnostic test accuracy (DTA) studies. | **Title** (manuscript title) |
| Abstract | 2 | Abstract: See PRISMA-DTA for abstracts. | **Abstract** (Background, Methods, Results, Conclusion, Keywords) |
| **INTRODUCTION** | | |  |
| Rationale | 3 | Describe the rationale for the review in the context of what is already known. | **Introduction** (paragraph outlining diagnostic challenges, fragmented evidence base, and need for evidence mapping/synthesis) |
| Clinical role of index test | D1 | State the scientific and clinical background, including the intended use and clinical role of the index test, and if applicable, the rationale for minimally acceptable test accuracy (or minimum difference in accuracy for comparative design). | **Introduction** (the role of diagnostics in at-risk populations; clinical context of serology/molecular tests/POCT and limitations in implementation) |
| Objectives | 4 | Provide an explicit statement of question(s) being addressed in terms of participants, index test(s), and target condition(s). | **Introduction** (purpose paragraph: "maps the evidence.../summarizes diagnostic performance...identifies evidence gaps") + Materials and Methods – Study Design and Registration (primary/secondary aims) |
| **METHODS** | | |  |
| Protocol and registration | 5 | Indicate if a review protocol exists, if and where it can be accessed (e.g., Web address), and, if available, provide registration information including registration number. | **Materials and Methods** – Study Design and Registration (internal protocol; not prospectively registered) |
| Eligibility criteria | 6 | Specify study characteristics (participants, setting, index test(s), reference standard(s), target condition(s), and study design) and report characteristics (e.g., years considered, language, publication status) used as criteria for eligibility, giving rationale. | **Materials and Methods** – Eligibility Criteria (inclusion/exclusion criteria, year range, language, meta-analysis requirements) |
| Information sources | 7 | Describe all information sources (e.g., databases with dates of coverage, contact with study authors to identify additional studies) in the search and date last searched. | **Materials and Methods** – Information Sources and Search Strategies (list of databases/registries and search coverage period) |
| Search | 8 | Present full search strategies for all electronic databases and other sources searched, including any limits used, such that they could be repeated. | **Materials and Methods** – Information Sources and Search Strategies (search strategy summary & limits) + Supplementary Table S1 (full search strings) |
| Study selection | 9 | State the process for selecting studies (i.e., screening, eligibility, included in systematic review, and, if applicable, included in the meta-analysis). | **Materials and Methods** – Study Selection and Data Extraction (two reviewers, title/abstract & full-text screening, conflict resolution) + reference to PRISMA flow diagram (Figure 1) |
| Data collection process | 10 | Describe method of data extraction from reports (e.g., piloted forms, independently, in duplicate) and any processes for obtaining and confirming data from investigators. | **Materials and Methods** – Study Selection and Data Extraction (duplicate extraction, standardized forms, Excel) |
| Definitions for data extraction | 11 | Provide definitions used in data extraction and classifications of target condition(s), index test(s), reference standard(s) and other characteristics (e.g. study design, clinical setting). | **Materials and Methods** – Study Selection and Data Extraction (definitions of extracted items: population, sample type, target, platform, etc.) + Validation Stage Classification (Tiered Framework) (Tier 0–3) |
| Risk of bias and applicability | 12 | Describe methods used for assessing risk of bias in individual studies and concerns regarding the applicability to the review question. | **Materials and Methods** – **Risk of Bias Assessment** (QUADAS-2, domains, assessment procedure) |
| Diagnostic accuracy measures | 13 | State the principal diagnostic accuracy measure(s) reported (e.g. sensitivity, specificity) and state the unit of assessment (e.g. per-patient, per-lesion). | **Materials and Methods** – **Data Synthesis and Analysis** → **Diagnostic Test Accuracy Meta-Analysis (Performance)** (sensitivity, specificity; 2x2 basis for meta-analysis) |
| Synthesis of results | 14 | Describe methods of handling data, combining results of studies and describing variability between studies. This could include, but is not limited to: a) handling of multiple definitions of target condition. b) handling of multiple thresholds of test positivity, c) handling multiple index test readers, d) handling of indeterminate test results, e) grouping and comparing tests,  f) handling of different reference standards | **Materials and Methods** – **Data Synthesis and Analysis** (Descriptive Analysis & Evidence Mapping; DTA Meta-analysis; Subgroup/Heterogeneity/Sensitivity Analyses) + explanation of heterogeneity/visual synthesis in results section |

*Adapted From:* McInnes MDF, Moher D, Thombs BD, McGrath TA, Bossuyt PM, The PRISMA-DTA Group (2018). Preferred Reporting Items for a Systematic Review and Meta-analysis of Diagnostic Test Accuracy Studies: The PRISMA-DTA Statement. JAMA. 2018 Jan 23;319(4):388-396. doi: 10.1001/jama.2017.19163.
